# Supplementary material for: Bioinformatic Analysis of the Type VI Secretion System and Its Potential Toxins in the Acinetobacter Genus
Source: Front Microbiol. 2019 Nov 1;10:2519. doi: 10.3389/fmicb.2019.02519 (PMC6838775; doi:10.3389/fmicb.2019.02519)
Supplement: TABLE S4 — BlastP-homology search for PAAR proteins in the Acinetobacter genus. [file Table_4.XLS]

## Sheet: Sheet1
Table S4. BlastP-homology search for PAAR proteins in the Acinetobacter genus (1)
Query gene acc. No	Subject protein accession and description	Organism	Location	Length (AA)	Classification (according to Shneider et al., 2013)	% identity	alignment length	mismatches	gap opens	q. start	q. end	q. cov	s. start	s. end	evalue	bit score	(1) Since when using DSM30011 PAAR-1 and PAAR-2 as query almost the same results were obtained, only the hits obtained for the former are presented.
DSM30011_11445	AVO91882.1 PAAR domain-containing protein	Acinetobacter baumannii	T6SSI-main cluster	87	1	100.00	87	0	0	1	87	100	1	87	1e-56	175
DSM30011_11445	AVE54876.1 PAAR domain-containing protein	Acinetobacter baumannii	T6SSI-main cluster	87	1	100.00	87	0	0	1	87	100	1	87	1e-56	175
DSM30011_11445	ARN31285.1 hypothetical protein A4U85_11220	Acinetobacter baumannii	T6SSI-main cluster	87	1	100.00	87	0	0	1	87	100	1	87	1e-56	175
DSM30011_11445	ARG38215.1 hypothetical protein B7L35_04870	Acinetobacter baumannii WKA02	T6SSI-main cluster*	87	1	100.00	87	0	0	1	87	100	1	87	1e-56	175
DSM30011_11445	APX50337.1 hypothetical protein AT570_14010	Acinetobacter baumannii	T6SSI-main cluster	87	1	100.00	87	0	0	1	87	100	1	87	1e-56	175
DSM30011_11445	ATD20730.1 PAAR domain-containing protein	Acinetobacter baumannii	T6SSI-main cluster	87	1	100.00	87	0	0	1	87	100	1	87	1e-56	175
DSM30011_11445	APJ20068.1 hypothetical protein BS064_13470	Acinetobacter baumannii	T6SSI-main cluster	87	1	100.00	87	0	0	1	87	100	1	87	1e-56	175
DSM30011_11445	ANC38434.1 hypothetical protein Aba3207_18125	Acinetobacter baumannii 3207	T6SSI-main cluster*	87	1	100.00	87	0	0	1	87	100	1	87	1e-56	175
DSM30011_11445	ANA37231.1 hypothetical protein AWN74_05650	Acinetobacter baumannii	T6SSI-main cluster	87	1	100.00	87	0	0	1	87	100	1	87	1e-56	175
DSM30011_11445	AKQ27370.1 PAAR domain-containing protein family protein	Acinetobacter baumannii	T6SSI-main cluster	87	1	100.00	87	0	0	1	87	100	1	87	1e-56	175
DSM30011_11445	AKQ31061.1 PAAR domain-containing protein family protein	Acinetobacter baumannii	T6SSI-main cluster	87	1	100.00	87	0	0	1	87	100	1	87	1e-56	175
DSM30011_11445	AIS06014.1 PAAR domain-containing protein family protein	Acinetobacter baumannii AbH12O-A2	T6SSI-main cluster*	87	1	100.00	87	0	0	1	87	100	1	87	1e-56	175
DSM30011_11445	AIL77812.1 PAAR domain-containing protein family protein	Acinetobacter baumannii AB030	T6SSI-main cluster*	87	1	100.00	87	0	0	1	87	100	1	87	1e-56	175
DSM30011_11445	AWL19694.1 PAAR domain-containing protein	Acinetobacter nosocomialis NCTC 8102	T6SSI-main cluster	87	1	98.85	87	1	0	1	87	100	1	87	3e-56	174
DSM30011_11445	AVF44730.1 PAAR domain-containing protein	Acinetobacter nosocomialis FDAARGOS_129	T6SSI-main cluster	87	1	98.85	87	1	0	1	87	100	1	87	3e-56	174
DSM30011_11445	PJG67640.1 PAAR domain-containing protein	Acinetobacter seifertii	T6SSI-main cluster	87	1	98.85	87	1	0	1	87	100	1	87	3e-56	174
DSM30011_11445	PJF05748.1 PAAR domain-containing protein	Acinetobacter seifertii	T6SSI-main cluster	87	1	98.85	87	1	0	1	87	100	1	87	3e-56	174
DSM30011_11445	ARG17456.1 hypothetical protein B7L44_13175	Acinetobacter nosocomialis SSA3	T6SSI-main cluster*	87	1	98.85	87	1	0	1	87	100	1	87	3e-56	174
DSM30011_11445	AJB48724.1 PAAR domain-containing protein family protein	Acinetobacter nosocomialis 6411	T6SSI-main cluster*	87	1	98.85	87	1	0	1	87	100	1	87	3e-56	174
DSM30011_11445	SQI56154.1 PAAR motif family protein	Acinetobacter baumannii	T6SSI-main cluster	87	1	98.85	87	1	0	1	87	100	1	87	4e-56	174
DSM30011_11445	SCD15511.1 PAAR motif family protein	Acinetobacter calcoaceticus	T6SSI-main cluster	87	1	98.85	87	1	0	1	87	100	1	87	4e-56	174
DSM30011_11445	AWW78012.1 hypothetical protein BWI80_11545	Acinetobacter baumannii	T6SSI-main cluster	87	1	98.85	87	1	0	1	87	100	1	87	4e-56	174
DSM30011_11445	AWW81802.1 PAAR domain-containing protein	Acinetobacter baumannii	T6SSI-main cluster	87	1	98.85	87	1	0	1	87	100	1	87	4e-56	174
DSM30011_11445	AWS03190.1 PAAR domain-containing protein	Acinetobacter baumannii	T6SSI-main cluster	87	1	98.85	87	1	0	1	87	100	1	87	4e-56	174
DSM30011_11445	AWO15869.1 PAAR domain-containing protein	Acinetobacter baumannii DA33098	T6SSI-main cluster* (RI insertion)	87	1	98.85	87	1	0	1	87	100	1	87	4e-56	174
DSM30011_11445	AVN04649.1 PAAR motif family protein	Acinetobacter baumannii	T6SSI-main cluster	87	1	98.85	87	1	0	1	87	100	1	87	4e-56	174
DSM30011_11445	AVN29257.1 PAAR domain-containing protein	Acinetobacter baumannii	T6SSI-main cluster	87	1	98.85	87	1	0	1	87	100	1	87	4e-56	174
DSM30011_11445	AVN13937.1 PAAR domain-containing protein	Acinetobacter baumannii	T6SSI-main cluster	87	1	98.85	87	1	0	1	87	100	1	87	4e-56	174
DSM30011_11445	AVN25414.1 PAAR domain-containing protein	Acinetobacter baumannii	T6SSI-main cluster	87	1	98.85	87	1	0	1	87	100	1	87	4e-56	174
DSM30011_11445	AVE90766.1 PAAR domain-containing protein	Acinetobacter baumannii	T6SSI-main cluster	87	1	98.85	87	1	0	1	87	100	1	87	4e-56	174
DSM30011_11445	AVF08054.1 PAAR domain-containing protein	Acinetobacter baumannii AR_0078	T6SSI-main cluster* (RI insertion)	87	1	98.85	87	1	0	1	87	100	1	87	4e-56	174
DSM30011_11445	AVG27175.1 PAAR domain-containing protein	Acinetobacter baumannii	T6SSI-main cluster	87	1	98.85	87	1	0	1	87	100	1	87	4e-56	174
DSM30011_11445	AVE45274.1 PAAR domain-containing protein	Acinetobacter baumannii	T6SSI-main cluster	87	1	98.85	87	1	0	1	87	100	1	87	4e-56	174
DSM30011_11445	ATY44634.1 PAAR motif protein	Acinetobacter baumannii	T6SSI-main cluster	87	1	98.85	87	1	0	1	87	100	1	87	4e-56	174
DSM30011_11445	ATU53230.1 PAAR domain-containing protein	Acinetobacter baumannii	T6SSI-main cluster	87	1	98.85	87	1	0	1	87	100	1	87	4e-56	174
DSM30011_11445	ATU22665.1 hypothetical protein AYP_001385	Acinetobacter baumannii	T6SSI-main cluster	87	1	98.85	87	1	0	1	87	100	1	87	4e-56	174
DSM30011_11445	ATR88374.1 PAAR domain-containing protein	Acinetobacter baumannii AbPK1	T6SSI-main cluster* (hcp internal STOP codon)	87	1	98.85	87	1	0	1	87	100	1	87	4e-56	174
DSM30011_11445	ATP87675.1 PAAR motif protein	Acinetobacter baumannii	T6SSI-main cluster	87	1	98.85	87	1	0	1	87	100	1	87	4e-56	174
DSM30011_11445	ASF76834.1 PAAR motif protein	Acinetobacter baumannii	T6SSI-main cluster	87	1	98.85	87	1	0	1	87	100	1	87	4e-56	174
DSM30011_11445	ARG31301.1 hypothetical protein B7L41_08785	Acinetobacter baumannii	T6SSI-main cluster	87	1	98.85	87	1	0	1	87	100	1	87	4e-56	174
DSM30011_11445	ARG36321.1 hypothetical protein B7L46_15920	Acinetobacter baumannii	T6SSI-main cluster	87	1	98.85	87	1	0	1	87	100	1	87	4e-56	174
DSM30011_11445	ARG24868.1 hypothetical protein B7L40_12690	Acinetobacter baumannii	T6SSI-main cluster	87	1	98.85	87	1	0	1	87	100	1	87	4e-56	174
DSM30011_11445	ARG26573.1 hypothetical protein B7L39_02770	Acinetobacter baumannii	T6SSI-main cluster	87	1	98.85	87	1	0	1	87	100	1	87	4e-56	174
DSM30011_11445	ARG21051.1 hypothetical protein B7L42_11360	Acinetobacter baumannii	T6SSI-main cluster	87	1	98.85	87	1	0	1	87	100	1	87	4e-56	174
DSM30011_11445	ARG13180.1 hypothetical protein B7L36_10135	Acinetobacter baumannii	T6SSI-main cluster	87	1	98.85	87	1	0	1	87	100	1	87	4e-56	174
DSM30011_11445	AQU55687.1 hypothetical protein AXK18_01360	Acinetobacter baumannii	T6SSI-main cluster	87	1	98.85	87	1	0	1	87	100	1	87	4e-56	174
DSM30011_11445	APQ93433.1 hypothetical protein AOT18_11620	Acinetobacter baumannii	T6SSI-main cluster	87	1	98.85	87	1	0	1	87	100	1	87	4e-56	174
DSM30011_11445	APQ89660.1 hypothetical protein AOT17_11625	Acinetobacter baumannii	T6SSI-main cluster	87	1	98.85	87	1	0	1	87	100	1	87	4e-56	174
DSM30011_11445	APQ85798.1 hypothetical protein AOT16_11640	Acinetobacter baumannii	T6SSI-main cluster	87	1	98.85	87	1	0	1	87	100	1	87	4e-56	174
DSM30011_11445	APM49401.1 hypothetical protein BS615_11705	Acinetobacter baumannii	T6SSI-main cluster	87	1	98.85	87	1	0	1	87	100	1	87	4e-56	174
DSM30011_11445	APJ23770.1 hypothetical protein BS065_11870	Acinetobacter baumannii	T6SSI-main cluster*	87	1	98.85	87	1	0	1	87	100	1	87	4e-56	174
DSM30011_11445	APF44212.1 hypothetical protein BKJ37_11840	Acinetobacter baumannii	T6SSI-main cluster	87	1	98.85	87	1	0	1	87	100	1	87	4e-56	174
DSM30011_11445	AOX77747.1 hypothetical protein KAB03_02135	Acinetobacter baumannii	T6SSI-main cluster	87	1	98.85	87	1	0	1	87	100	1	87	4e-56	174
DSM30011_11445	AOX69346.1 hypothetical protein KAB01_01457	Acinetobacter baumannii	T6SSI-main cluster	87	1	98.85	87	1	0	1	87	100	1	87	4e-56	174
DSM30011_11445	AMN01085.1 hypothetical protein AZE33_07790	Acinetobacter baumannii	T6SSI-main cluster	87	1	98.85	87	1	0	1	87	100	1	87	4e-56	174
DSM30011_11445	AML74844.1 hypothetical protein AYR70_11420	Acinetobacter baumannii	T6SSI-main cluster	87	1	98.85	87	1	0	1	87	100	1	87	4e-56	174
DSM30011_11445	AML71287.1 hypothetical protein AYR69_11530	Acinetobacter baumannii	T6SSI-main cluster	87	1	98.85	87	1	0	1	87	100	1	87	4e-56	174
DSM30011_11445	AML66680.1 hypothetical protein AYR68_06470	Acinetobacter baumannii	T6SSI-main cluster	87	1	98.85	87	1	0	1	87	100	1	87	4e-56	174
DSM30011_11445	AML64119.1 hypothetical protein AYR67_11615	Acinetobacter baumannii	T6SSI-main cluster	87	1	98.85	87	1	0	1	87	100	1	87	4e-56	174
DSM30011_11445	CUW34706.1 PAAR motif family protein	Acinetobacter baumannii	T6SSI-main cluster	87	1	98.85	87	1	0	1	87	100	1	87	4e-56	174
DSM30011_11445	CRL94023.1 PAAR motif family protein	Acinetobacter baumannii	T6SSI-main cluster	87	1	98.85	87	1	0	1	87	100	1	87	4e-56	174
DSM30011_11445	ALJ88385.1 hypothetical protein AN415_02481	Acinetobacter baumannii	T6SSI-main cluster	87	1	98.85	87	1	0	1	87	100	1	87	4e-56	174
DSM30011_11445	CRX65188.1 PAAR motif family protein	Acinetobacter baumannii R2090	T6SSI-main cluster (missing genes, ISN1 insertion)	87	1	98.85	87	1	0	1	87	100	1	87	4e-56	174
DSM30011_11445	AKJ46294.1 PAAR domain-containing protein family protein	Acinetobacter baumannii	T6SSI-main cluster	87	1	98.85	87	1	0	1	87	100	1	87	4e-56	174
DSM30011_11445	AKA32294.1 hypothetical protein ABUW_2570	Acinetobacter baumannii	T6SSI-main cluster	87	1	98.85	87	1	0	1	87	100	1	87	4e-56	174
DSM30011_11445	ANB89213.1 hypothetical protein SG90_011990	Acinetobacter baumannii	T6SSI-main cluster	87	1	98.85	87	1	0	1	87	100	1	87	4e-56	174
DSM30011_11445	AJF81311.1 PAAR motif family protein	Acinetobacter baumannii	T6SSI-main cluster	87	1	98.85	87	1	0	1	87	100	1	87	4e-56	174
DSM30011_11445	AIA52747.1 PAAR domain-containing protein family protein	Acinetobacter baumannii	T6SSI-main cluster	87	1	98.85	87	1	0	1	87	100	1	87	4e-56	174
DSM30011_11445	AHJ92819.1 PAAR motif family protein	Acinetobacter baumannii PKAB07	T6SSI-main cluster	87	1	98.85	87	1	0	1	87	100	1	87	4e-56	174
DSM30011_11445	AHB91897.1 hypothetical protein P795_10860	Acinetobacter baumannii ZW85-1	T6SSI-main cluster	87	1	98.85	87	1	0	1	87	100	1	87	4e-56	174
DSM30011_11445	AOP62686.1 hypothetical protein DU202_01520	Acinetobacter baumannii DU202	T6SSI-main cluster	87	1	98.85	87	1	0	1	87	100	1	87	4e-56	174
DSM30011_11445	AGQ09968.1 hypothetical protein BJAB0868_01419	Acinetobacter baumannii BJAB0868	T6SSI-main cluster	87	1	98.85	87	1	0	1	87	100	1	87	4e-56	174
DSM30011_11445	AGQ06136.1 hypothetical protein BJAB0715_01490	Acinetobacter baumannii BJAB0715	T6SSI-main cluster	87	1	98.85	87	1	0	1	87	100	1	87	4e-56	174
DSM30011_11445	AGQ13837.1 hypothetical protein BJAB07104_01469	Acinetobacter baumannii BJAB07104	T6SSI-main cluster	87	1	98.85	87	1	0	1	87	100	1	87	4e-56	174
DSM30011_11445	AHX64168.1 hypothetical protein B856_02560	Acinetobacter baumannii AC30	T6SSI-main cluster	87	1	98.85	87	1	0	1	87	100	1	87	4e-56	174
DSM30011_11445	AFU37767.1 hypothetical protein M3Q_1675	Acinetobacter baumannii TYTH-1	T6SSI-main cluster	87	1	98.85	87	1	0	1	87	100	1	87	4e-56	174
DSM30011_11445	AEP05924.1 conserve hypothetical protein	Acinetobacter baumannii MDR-ZJ06	T6SSI-main cluster	87	1	98.85	87	1	0	1	87	100	1	87	4e-56	174
DSM30011_11445	ADX91907.1 hypothetical protein ABTW07_1478	Acinetobacter baumannii TCDC-AB0715	T6SSI-main cluster	87	1	98.85	87	1	0	1	87	100	1	87	4e-56	174
DSM30011_11445	ADX03388.1 Putative uncharacterized protein	Acinetobacter baumannii 1656-2	T6SSI-main cluster	87	1	98.85	87	1	0	1	87	100	1	87	4e-56	174
DSM30011_11445	AFI96002.1 hypothetical protein ABTJ_02404	Acinetobacter baumannii MDR-TJ	T6SSI-main cluster	87	1	98.85	87	1	0	1	87	100	1	87	4e-56	174
DSM30011_11445	CAM87255.1 conserved hypothetical protein	Acinetobacter baumannii AYE	T6SSI-main cluster	87	1	98.85	87	1	0	1	87	100	1	87	4e-56	174
DSM30011_11445	ACJ40507.1 hypothetical protein AB57_1489	Acinetobacter baumannii AB0057	T6SSI-main cluster	87	1	98.85	87	1	0	1	87	100	1	87	4e-56	174
DSM30011_11445	ACJ59379.1 PAAR motif family protein	Acinetobacter baumannii AB307-0294	T6SSI-main cluster	87	1	98.85	87	1	0	1	87	100	1	87	4e-56	174
DSM30011_11445	ACC56618.1 uncharacterized conserved protein	Acinetobacter baumannii ACICU	T6SSI-main cluster	87	1	98.85	87	1	0	1	87	100	1	87	4e-56	174
DSM30011_11445	KMV01936.1 PAAR motif family protein	Acinetobacter baumannii	T6SSI-main cluster	87	1	97.70	87	2	0	1	87	100	1	87	8e-56	173
DSM30011_11445	BAP67172.1 hypothetical protein IOMTU433_2394	Acinetobacter baumannii	T6SSI-main cluster	87	1	97.70	87	2	0	1	87	100	1	87	8e-56	173
DSM30011_11445	CAP01564.1 conserved hypothetical protein	Acinetobacter baumannii SDF	T6SSI-main cluster	87	1	96.55	87	3	0	1	87	100	1	87	8e-55	171
DSM30011_11445	ENU42280.1 hypothetical protein F985_03168	Acinetobacter seifertii	T6SSI-main cluster	87	1	96.55	87	3	0	1	87	100	1	87	1e-54	170
DSM30011_11445	AUM26762.1 hypothetical protein BVD86_07510	Acinetobacter pittii XJ88	T6SSI-main cluster	87	1	95.40	87	4	0	1	87	100	1	87	1e-53	168
DSM30011_11445	AMX18976.1 PAAR motif protein	Acinetobacter pittii IEC338SC	T6SSI-main cluster	87	1	95.40	87	4	0	1	87	100	1	87	1e-53	168
DSM30011_11445	AMM29123.1 hypothetical protein AYJ52_12060	Acinetobacter pittii AP_882	T6SSI-main cluster (missing genes, ISN1 insertion in tssG)	87	1	95.40	87	4	0	1	87	100	1	87	1e-53	168
DSM30011_11445	AQV16126.1 hypothetical protein BMU11_11330	Acinetobacter pittii YMC2010/8/T346	T6SSI-main cluster	87	1	94.25	87	5	0	1	87	100	1	87	3e-53	167
DSM30011_11445	AQZ81333.1 hypothetical protein BUM88_06790	Acinetobacter calcoaceticus	T6SSI-main cluster	87	1	94.25	87	5	0	1	87	100	1	87	6e-53	166
DSM30011_11445	ARD29412.1 hypothetical protein OTEC02_11845	Acinetobacter lactucae	T6SSI-main cluster	87	1	94.25	87	5	0	1	87	100	1	87	1e-52	165
DSM30011_11445	ADI91330.1 hypothetical protein AOLE_12215	Acinetobacter oleivorans DR1	T6SSI-main cluster	87	1	93.10	87	6	0	1	87	100	1	87	2e-52	164
DSM30011_11445	SBS23031.1 PAAR motif family protein,Uncharacterized conserved protein,PAAR motif	Acinetobacter baumannii		280	2a	88.37	86	10	0	1	86	99	1	86	7e-49	162
DSM30011_11445	AWW82305.1 PAAR domain-containing protein	Acinetobacter baumannii		280	2a	88.37	86	10	0	1	86	99	1	86	7e-49	162
DSM30011_11445	AWS02761.1 PAAR domain-containing protein	Acinetobacter baumannii		280	2a	88.37	86	10	0	1	86	99	1	86	7e-49	162
DSM30011_11445	AVO88913.1 PAAR domain-containing protein	Acinetobacter baumannii		280	2a	88.37	86	10	0	1	86	99	1	86	7e-49	162
DSM30011_11445	AVG27583.1 PAAR domain-containing protein	Acinetobacter baumannii		280	2a	88.37	86	10	0	1	86	99	1	86	7e-49	162
DSM30011_11445	ATU57310.1 PAAR domain-containing protein	Acinetobacter baumannii		280	2a	88.37	86	10	0	1	86	99	1	86	7e-49	162
DSM30011_11445	ATU49977.1 PAAR domain-containing protein	Acinetobacter baumannii		280	2a	88.37	86	10	0	1	86	99	1	86	7e-49	162
DSM30011_11445	ARG05215.1 hypothetical protein B7L43_07120	Acinetobacter baumannii SSMA17		280	2a	88.37	86	10	0	1	86	99	1	86	7e-49	162
DSM30011_11445	ARF95850.1 hypothetical protein B7L38_06350	Acinetobacter baumannii		280	2a	88.37	86	10	0	1	86	99	1	86	7e-49	162
DSM30011_11445	ARG02911.1 hypothetical protein B7L45_14485	Acinetobacter baumannii		280	2a	88.37	86	10	0	1	86	99	1	86	7e-49	162
DSM30011_11445	ARG38662.1 hypothetical protein B7L35_07295	Acinetobacter baumannii		280	2a	88.37	86	10	0	1	86	99	1	86	7e-49	162
DSM30011_11445	ARG14476.1 hypothetical protein B7L36_17250	Acinetobacter baumannii		280	2a	88.37	86	10	0	1	86	99	1	86	7e-49	162
DSM30011_11445	ARG09875.1 hypothetical protein B7L31_12215	Acinetobacter baumannii		280	2a	88.37	86	10	0	1	86	99	1	86	7e-49	162
DSM30011_11445	APQ93847.1 hypothetical protein AOT18_13800	Acinetobacter baumannii		280	2a	88.37	86	10	0	1	86	99	1	86	7e-49	162
DSM30011_11445	APQ90070.1 hypothetical protein AOT17_13755	Acinetobacter baumannii		280	2a	88.37	86	10	0	1	86	99	1	86	7e-49	162
DSM30011_11445	APQ86212.1 hypothetical protein AOT16_13820	Acinetobacter baumannii		280	2a	88.37	86	10	0	1	86	99	1	86	7e-49	162
DSM30011_11445	APM49852.1 hypothetical protein BS615_14090	Acinetobacter baumannii		280	2a	88.37	86	10	0	1	86	99	1	86	7e-49	162
DSM30011_11445	APJ24183.1 hypothetical protein BS065_14095	Acinetobacter baumannii		280	2a	88.37	86	10	0	1	86	99	1	86	7e-49	162
DSM30011_11445	AOX95988.1 hypothetical protein KAB08_01000	Acinetobacter baumannii		280	2a	88.37	86	10	0	1	86	99	1	86	7e-49	162
DSM30011_11445	AOX92135.1 hypothetical protein KAB07_01003	Acinetobacter baumannii		280	2a	88.37	86	10	0	1	86	99	1	86	7e-49	162
DSM30011_11445	AOX88296.1 hypothetical protein KAB06_01015	Acinetobacter baumannii		280	2a	88.37	86	10	0	1	86	99	1	86	7e-49	162
DSM30011_11445	AOX84420.1 hypothetical protein KAB05_01034	Acinetobacter baumannii KAB05		280	2a	88.37	86	10	0	1	86	99	1	86	7e-49	162
DSM30011_11445	AOX82309.1 hypothetical protein KAB04_02873	Acinetobacter baumannii		280	2a	88.37	86	10	0	1	86	99	1	86	7e-49	162
DSM30011_11445	AOX72724.1 PAAR motif protein	Acinetobacter baumannii		280	2a	88.37	86	10	0	1	86	99	1	86	7e-49	162
DSM30011_11445	AMN00565.1 hypothetical protein AZE33_05030	Acinetobacter baumannii		280	2a	88.37	86	10	0	1	86	99	1	86	7e-49	162
DSM30011_11445	AML75290.1 hypothetical protein AYR70_13775	Acinetobacter baumannii		280	2a	88.37	86	10	0	1	86	99	1	86	7e-49	162
DSM30011_11445	AML70016.1 hypothetical protein AYR69_04880	Acinetobacter baumannii		280	2a	88.37	86	10	0	1	86	99	1	86	7e-49	162
DSM30011_11445	AML66264.1 hypothetical protein AYR68_04275	Acinetobacter baumannii		280	2a	88.37	86	10	0	1	86	99	1	86	7e-49	162
DSM30011_11445	AKJ46773.1 membrane protein	Acinetobacter baumannii		280	2a	88.37	86	10	0	1	86	99	1	86	7e-49	162
DSM30011_11445	AJB67802.1 membrane protein	Acinetobacter baumannii		280	2a	88.37	86	10	0	1	86	99	1	86	7e-49	162
DSM30011_11445	AFU37287.1 hypothetical protein M3Q_1195	Acinetobacter baumannii TYTH-1		280	2a	88.37	86	10	0	1	86	99	1	86	7e-49	162
DSM30011_11445	AWW78417.1 hypothetical protein BWI80_13720	Acinetobacter baumannii		280	2a	88.37	86	10	0	1	86	99	1	86	9e-49	161
DSM30011_11445	AQU56077.1 hypothetical protein AXK18_03505	Acinetobacter baumannii		280	2a	88.37	86	10	0	1	86	99	1	86	9e-49	161
DSM30011_11445	AOX76659.1 Membrane protein	Acinetobacter baumannii		280	2a	88.37	86	10	0	1	86	99	1	86	9e-49	161
DSM30011_11445	AOX68910.1 Membrane protein	Acinetobacter baumannii		280	2a	88.37	86	10	0	1	86	99	1	86	9e-49	161
DSM30011_11445	AIA50287.1 membrane protein	Acinetobacter baumannii		280	2a	88.37	86	10	0	1	86	99	1	86	9e-49	161
DSM30011_11445	AHJ92403.1 paar domain-containing protein family protein	Acinetobacter baumannii PKAB07		280	2a	88.37	86	10	0	1	86	99	1	86	9e-49	161
DSM30011_11445	AHX65958.1 membrane protein	Acinetobacter baumannii AC30		280	2a	88.37	86	10	0	1	86	99	1	86	9e-49	161
DSM30011_11445	ENX34299.1 hypothetical protein F889_02063	Acinetobacter colistiniresistens NIPH 1859	T6SSI-main cluster	176	2a	87.21	86	11	0	1	86	99	1	86	1e-48	158
DSM30011_11445	ATI38726.1 hypothetical protein BS103_09060	Acinetobacter baumannii	orphan PAAR gene	271	2a	87.21	86	11	0	1	86	99	1	86	4e-48	159
DSM30011_11445	PKF33851.1 PAAR domain-containing protein	Acinetobacter proteolyticus	T6SSI-main cluster	87	1	83.91	87	14	0	1	87	100	1	87	4e-48	154
DSM30011_11445	OBY75985.1 PAAR domain-containing protein family protein	Acinetobacter gyllenbergii FMP01	T6SSI-main cluster	87	1	83.91	87	14	0	1	87	100	1	87	4e-48	154
DSM30011_11445	ESK50137.1 hypothetical protein F987_01683	Acinetobacter gyllenbergii NIPH 230	T6SSI-main cluster (missing genes)	87	1	83.91	87	14	0	1	87	100	1	87	4e-48	154
DSM30011_11445	EPG38565.1 hypothetical protein F907_01150	Acinetobacter colistiniresistens NIPH 2036	T6SSI-main cluster (missing genes, ISAba19 insertion)	87	1	83.91	87	14	0	1	87	100	1	87	5e-48	153
DSM30011_11445	ATY44919.1 PAAR motif protein	Acinetobacter baumannii		271	2a	84.88	86	13	0	1	86	99	1	86	6e-48	159
DSM30011_11445	ACJ56429.1 PAAR motif family protein	Acinetobacter baumannii AB307-0294		271	2a	84.88	86	13	0	1	86	99	1	86	6e-48	159
DSM30011_11445	AVF08371.1 PAAR domain-containing protein	Acinetobacter baumannii		271	2a	86.05	86	12	0	1	86	99	1	86	8e-48	159
DSM30011_11445	APX50829.1 hypothetical protein AT570_16590	Acinetobacter baumannii AB042	orphan PAAR gene	271	2a	86.05	86	12	0	1	86	99	1	86	8e-48	159
DSM30011_11445	AKQ26878.1 membrane protein	Acinetobacter baumannii		271	2a	86.05	86	12	0	1	86	99	1	86	8e-48	159
DSM30011_11445	AVO92382.1 PAAR domain-containing protein	Acinetobacter baumannii		272	2a	86.05	86	12	0	1	86	99	1	86	8e-48	159
DSM30011_11445	AVE55281.1 PAAR domain-containing protein	Acinetobacter baumannii		272	2a	86.05	86	12	0	1	86	99	1	86	8e-48	159
DSM30011_11445	ATD21324.1 PAAR domain-containing protein	Acinetobacter baumannii		272	2a	86.05	86	12	0	1	86	99	1	86	8e-48	159
DSM30011_11445	APJ19474.1 hypothetical protein BS064_10335	Acinetobacter baumannii AF-401	orphan PAAR gene	272	2a	86.05	86	12	0	1	86	99	1	86	8e-48	159
DSM30011_11445	PJG67885.1 paar motif family protein	Acinetobacter seifertii V1371 18		184	2a	83.72	86	14	0	1	86	99	1	86	2e-47	155
DSM30011_11445	SQI56576.1 paar motif family	Acinetobacter baumannii		180	2a	84.88	86	13	0	1	86	99	1	86	3e-47	154
DSM30011_11445	ATP87859.1 PAAR motif protein	Acinetobacter baumannii A388		180	2a	84.88	86	13	0	1	86	99	1	86	3e-47	154
DSM30011_11445	ASF76653.1 PAAR motif protein	Acinetobacter baumannii		180	2a	84.88	86	13	0	1	86	99	1	86	3e-47	154
DSM30011_11445	ATD21616.1 PAAR domain-containing protein	Acinetobacter baumannii		180	2a	84.88	86	13	0	1	86	99	1	86	3e-47	154
DSM30011_11445	ACJ40326.1 paar motif family protein	Acinetobacter baumannii AB0057		180	2a	84.88	86	13	0	1	86	99	1	86	3e-47	154
DSM30011_11445	ARG20299.1 paar motif family protein	Acinetobacter baumannii		180	2a	84.88	86	13	0	1	86	99	1	86	3e-47	154
DSM30011_11445	ARD27797.1 paar motif family protein	Acinetobacter lactucae OTEC-02		178	2b	84.88	86	13	0	1	86	99	1	86	3e-47	154
DSM30011_11445	ENW02610.1 hypothetical protein F934_03117	Acinetobacter beijerinckii ANC 3835	T6SSI-main cluster	87	1	80.46	87	17	0	1	87	100	1	87	4e-47	151
DSM30011_11445	AWL20111.1 PAAR domain-containing protein	Acinetobacter nosocomialis NCTC 8102		181	2a	83.72	86	14	0	1	86	99	1	86	6e-47	154
DSM30011_11445	AJB49096.1 paar motif family protein	Acinetobacter nosocomialis 6411	orphan PAAR gene	181	2a	83.72	86	14	0	1	86	99	1	86	6e-47	154
DSM30011_11445	AVN28821.1 PAAR domain-containing protein	Acinetobacter baumannii AR_0088	orphan PAAR gene	181	2a	83.72	86	14	0	1	86	99	1	86	7e-47	154
DSM30011_11445	ARG35882.1 paar motif family protein	Acinetobacter baumannii HWBA8		181	2a	83.72	86	14	0	1	86	99	1	86	7e-47	154
DSM30011_11445	ATD18670.1 PAAR domain-containing protein	Acinetobacter baumannii 11510	orphan PAAR gene	181	2a	83.72	86	14	0	1	86	99	1	86	7e-47	154
DSM30011_11445	AIL77266.1 paar motif family protein	Acinetobacter baumannii AB030		181	2a	83.72	86	14	0	1	86	99	1	86	7e-47	154
DSM30011_11445	ENW08734.1 hypothetical protein F933_00061	Acinetobacter beijerinckii CIP 110307	T6SSI-main cluster	87	1	80.46	87	17	0	1	87	100	1	87	9e-47	150
DSM30011_11445	ALH95843.1 hypothetical protein AOY20_10060	Acinetobacter equi	T6SSI-main cluster	87	1	80.46	87	17	0	1	87	100	1	87	1e-46	150
DSM30011_11445	ATZ67635.1 paar motif family protein	Acinetobacter haemolyticus XH900		176	2a	83.72	86	14	0	1	86	99	1	86	1e-46	152
DSM30011_11445	ARG17891.1 paar motif family protein	Acinetobacter nosocomialis SSA3	orphan PAAR gene	181	2a	82.56	86	15	0	1	86	99	1	86	2e-46	152
DSM30011_11445	AVF45148.1 PAAR domain-containing protein	Acinetobacter nosocomialis FDAARGOS_129		181	2a	82.56	86	15	0	1	86	99	1	86	3e-46	152
DSM30011_11445	APR69682.1 hypothetical protein AHTJS_04265	Acinetobacter haemolyticus TJS01	T6SSI-main cluster* (only 4 genes)	87	1	81.61	87	16	0	1	87	100	1	87	4e-46	149
DSM30011_11445	APR69969.1 paar motif family protein	Acinetobacter haemolyticus TJS01		176	2a	82.56	86	15	0	1	86	99	1	86	8e-46	150
DSM30011_11445	ESK35400.1 hypothetical protein F987_04312	Acinetobacter gyllenbergii NIPH 230		172	2b	82.14	84	15	0	1	84	97	1	84	3e-45	149
DSM30011_11445	APO58385.1 hypothetical protein BBX32_07465	Acinetobacter baumannii		280	2a	83.72	86	14	0	1	86	99	1	86	5e-45	152
DSM30011_11445	AIY38207.1 hypothetical protein ABLAC_28520	Acinetobacter baumannii LAC-4		280	2a	83.72	86	14	0	1	86	99	1	86	5e-45	152
DSM30011_11445	ATZ67759.1 paar motif family protein	Acinetobacter haemolyticus XH900	orphan PAAR gene	188	2a	81.40	86	16	0	1	86	99	1	86	6e-45	149
DSM30011_11445	APR69792.1 hypothetical protein AHTJS_04860	Acinetobacter haemolyticus TJS01	orphan PAAR gene	296	2a	82.56	86	15	0	1	86	99	1	86	9e-45	151
DSM30011_11445	ATU44800.1 hypothetical protein CS557_04620	Acinetobacter junii	T6SSI-main cluster	87	1	79.76	84	17	0	1	84	97	1	84	1e-44	145
DSM30011_11445	SBS21979.1 PAAR motif family protein,Uncharacterized conserved protein,PAAR motif	Acinetobacter baumannii		279	2a	81.40	86	16	0	1	86	99	1	86	3e-44	149
DSM30011_11445	AWW77502.1 hypothetical protein BWI80_08880	Acinetobacter baumannii XH731	orphan PAAR gene	279	2a	81.40	86	16	0	1	86	99	1	86	3e-44	149
DSM30011_11445	AWW81239.1 PAAR domain-containing protein	Acinetobacter baumannii		279	2a	81.40	86	16	0	1	86	99	1	86	3e-44	149
DSM30011_11445	AWS03802.1 PAAR domain-containing protein	Acinetobacter baumannii		279	2a	81.40	86	16	0	1	86	99	1	86	3e-44	149
DSM30011_11445	AWO15366.1 PAAR domain-containing protein	Acinetobacter baumannii		279	2a	81.40	86	16	0	1	86	99	1	86	3e-44	149
DSM30011_11445	AVO88035.1 PAAR domain-containing protein	Acinetobacter baumannii		279	2a	81.40	86	16	0	1	86	99	1	86	3e-44	149
DSM30011_11445	AVE90258.1 PAAR domain-containing protein	Acinetobacter baumannii		279	2a	81.40	86	16	0	1	86	99	1	86	3e-44	149
DSM30011_11445	AVG26661.1 PAAR domain-containing protein	Acinetobacter baumannii		279	2a	81.40	86	16	0	1	86	99	1	86	3e-44	149
DSM30011_11445	AVE44768.1 PAAR domain-containing protein	Acinetobacter baumannii		279	2a	81.40	86	16	0	1	86	99	1	86	3e-44	149
DSM30011_11445	AUG11132.1 PAAR domain-containing protein	Acinetobacter baumannii		279	2a	81.40	86	16	0	1	86	99	1	86	3e-44	149
DSM30011_11445	ATU52722.1 PAAR domain-containing protein	Acinetobacter baumannii		279	2a	81.40	86	16	0	1	86	99	1	86	3e-44	149
DSM30011_11445	ATU56359.1 PAAR domain-containing protein	Acinetobacter baumannii		279	2a	81.40	86	16	0	1	86	99	1	86	3e-44	149
DSM30011_11445	ATU49025.1 PAAR domain-containing protein	Acinetobacter baumannii		279	2a	81.40	86	16	0	1	86	99	1	86	3e-44	149
DSM30011_11445	ATR87827.1 PAAR domain-containing protein	Acinetobacter baumannii		279	2a	81.40	86	16	0	1	86	99	1	86	3e-44	149
DSM30011_11445	ARG04435.1 hypothetical protein B7L43_02965	Acinetobacter baumannii SSMA17	orphan PAAR gene	279	2a	81.40	86	16	0	1	86	99	1	86	3e-44	149
DSM30011_11445	ARF94962.1 hypothetical protein B7L38_01670	Acinetobacter baumannii		279	2a	81.40	86	16	0	1	86	99	1	86	3e-44	149
DSM30011_11445	ARG02029.1 hypothetical protein B7L45_09870	Acinetobacter baumannii		279	2a	81.40	86	16	0	1	86	99	1	86	3e-44	149
DSM30011_11445	ARG25378.1 hypothetical protein B7L40_15335	Acinetobacter baumannii		279	2a	81.40	86	16	0	1	86	99	1	86	3e-44	149
DSM30011_11445	ARG27082.1 hypothetical protein B7L39_05390	Acinetobacter baumannii		279	2a	81.40	86	16	0	1	86	99	1	86	3e-44	149
DSM30011_11445	ARF91556.1 hypothetical protein B6S64_03225	Acinetobacter baumannii		279	2a	81.40	86	16	0	1	86	99	1	86	3e-44	149
DSM30011_11445	ARG20582.1 hypothetical protein B7L42_08945	Acinetobacter baumannii		279	2a	81.40	86	16	0	1	86	99	1	86	3e-44	149
DSM30011_11445	ARG13497.1 hypothetical protein B7L36_11840	Acinetobacter baumannii		279	2a	81.40	86	16	0	1	86	99	1	86	3e-44	149
DSM30011_11445	ARG08993.1 hypothetical protein B7L31_07600	Acinetobacter baumannii		279	2a	81.40	86	16	0	1	86	99	1	86	3e-44	149
DSM30011_11445	APM48994.1 hypothetical protein BS615_09530	Acinetobacter baumannii		279	2a	81.40	86	16	0	1	86	99	1	86	3e-44	149
DSM30011_11445	APJ23250.1 hypothetical protein BS065_09195	Acinetobacter baumannii		279	2a	81.40	86	16	0	1	86	99	1	86	3e-44	149
DSM30011_11445	AOX96916.1 hypothetical protein KAB08_01933	Acinetobacter baumannii		279	2a	81.40	86	16	0	1	86	99	1	86	3e-44	149
DSM30011_11445	AOX93057.1 hypothetical protein KAB07_01930	Acinetobacter baumannii		279	2a	81.40	86	16	0	1	86	99	1	86	3e-44	149
DSM30011_11445	AOX89222.1 hypothetical protein KAB06_01946	Acinetobacter baumannii		279	2a	81.40	86	16	0	1	86	99	1	86	3e-44	149
DSM30011_11445	AOX85362.1 hypothetical protein KAB05_01981	Acinetobacter baumannii		279	2a	81.40	86	16	0	1	86	99	1	86	3e-44	149
DSM30011_11445	AOX81383.1 hypothetical protein KAB04_01942	Acinetobacter baumannii		279	2a	81.40	86	16	0	1	86	99	1	86	3e-44	149
DSM30011_11445	AOX77199.1 hypothetical protein KAB03_01586	Acinetobacter baumannii		279	2a	81.40	86	16	0	1	86	99	1	86	3e-44	149
DSM30011_11445	AOX73648.1 hypothetical protein KAB02_01933	Acinetobacter baumannii		279	2a	81.40	86	16	0	1	86	99	1	86	3e-44	149
DSM30011_11445	AOX69891.1 hypothetical protein KAB01_02003	Acinetobacter baumannii		279	2a	81.40	86	16	0	1	86	99	1	86	3e-44	149
DSM30011_11445	AMC15495.1 hypothetical protein AXA63_08190	Acinetobacter baumannii		279	2a	81.40	86	16	0	1	86	99	1	86	3e-44	149
DSM30011_11445	ALX99505.1 Paar domain-containing protein family protein	Acinetobacter baumannii		279	2a	81.40	86	16	0	1	86	99	1	86	3e-44	149
DSM30011_11445	BAN87639.1 hypothetical protein AB237_1703	Acinetobacter baumannii NCGM 237	orphan PAAR gene	279	2a	81.40	86	16	0	1	86	99	1	86	3e-44	149
DSM30011_11445	AHJ93348.1 paar domain-containing protein family protein	Acinetobacter baumannii PKAB07		279	2a	81.40	86	16	0	1	86	99	1	86	3e-44	149
DSM30011_11445	AOP63301.1 hypothetical protein DU202_02137	Acinetobacter baumannii DU202		279	2a	81.40	86	16	0	1	86	99	1	86	3e-44	149
DSM30011_11445	AHX65181.1 membrane protein	Acinetobacter baumannii AC30		279	2a	81.40	86	16	0	1	86	99	1	86	3e-44	149
DSM30011_11445	AFU38281.1 hypothetical protein M3Q_2189	Acinetobacter baumannii TYTH-1	orphan PAAR gene	279	2a	81.40	86	16	0	1	86	99	1	86	3e-44	149
DSM30011_11445	AFI95473.1 hypothetical protein ABTJ_01870	Acinetobacter baumannii MDR-TJ		279	2a	81.40	86	16	0	1	86	99	1	86	3e-44	149
DSM30011_11445	ACC57146.1 uncharacterized conserved protein	Acinetobacter baumannii ACICU		279	2a	81.40	86	16	0	1	86	99	1	86	3e-44	149
DSM30011_11445	EPG37574.1 hypothetical protein F907_01544	Acinetobacter colistiniresistens NIPH 2036	orphan PAAR gene	183	2a	78.57	84	18	0	1	84	97	1	84	3e-44	147
DSM30011_11445	AVF43520.1 PAAR domain-containing protein	Acinetobacter nosocomialis FDAARGOS_129	orphan PAAR gene	171	2a	80.23	86	17	0	1	86	99	1	86	1e-43	145
DSM30011_11445	ARG16299.1 paar motif family protein	Acinetobacter nosocomialis		171	2a	80.23	86	17	0	1	86	99	1	86	1e-43	145
DSM30011_11445	EOR10583.1 hypothetical protein I593_00754	Acinetobacter tandoii DSM 14970 = CIP 107469	T6SSI-main cluster	88	1	75.29	85	21	0	1	85	98	1	85	2e-43	142
DSM30011_11445	ENX33879.1 hypothetical protein F889_02543	Acinetobacter colistiniresistens		183	2a	77.38	84	19	0	1	84	97	1	84	2e-43	145
DSM30011_11445	AOA58832.1 hypothetical protein BFG52_11035	Acinetobacter larvae	T6SSI-main cluster	88	1	79.76	84	17	0	1	84	97	1	84	2e-43	141
DSM30011_11445	AWL18533.1 PAAR domain-containing protein	Acinetobacter nosocomialis		174	2a	80.23	86	17	0	1	86	99	1	86	2e-43	144
DSM30011_11445	CAP00408.1 putative bacteriophage protein	Acinetobacter baumannii SDF		178	2a	79.07	86	18	0	1	86	99	1	86	1e-42	142
DSM30011_11445	AWV85777.1 PAAR domain-containing protein	Acinetobacter radioresistens	T6SSI-main cluster	88	1	76.19	84	20	0	1	84	97	1	84	1e-41	137
DSM30011_11445	ATZ67872.1 hypothetical protein BSR56_11280	Acinetobacter haemolyticus XH900	T6SSI-main cluster (missing genes, IS insertion)	86	1	83.78	74	12	0	1	74	85	1	74	4e-39	130
DSM30011_11445	ENV53359.1 hypothetical protein F952_02420	Acinetobacter baylyi DSM 14961 = CIP 107474	T6SSI-main cluster	88	1	69.88	83	25	0	1	83	95	1	83	2e-34	119
DSM30011_11445	CAG69435.1 conserved hypothetical protein	Acinetobacter sp. ADP1	T6SSI-main cluster	88	1	69.88	83	25	0	1	83	95	1	83	2e-34	119
DSM30011_11445	APV34695.1 hypothetical protein BEN76_01160	Acinetobacter soli	T6SSI-main cluster	88	1	68.67	83	26	0	1	83	95	1	83	3e-34	118
DSM30011_11445	ATZ61879.1 hypothetical protein BSR55_00200	Acinetobacter bereziniae	T6SSI-main cluster	88	1	71.08	83	24	0	1	83	95	1	83	8e-34	117
DSM30011_11445	BAP39238.1 hypothetical protein AS4_42980	Acinetobacter guillouiae	T6SSI-main cluster	88	1	68.67	83	26	0	1	83	95	1	83	2e-32	114
DSM30011_11445	ENV14868.1 hypothetical protein F964_04455	Acinetobacter guillouiae NIPH 991	T6SSI-main cluster	88	1	68.67	83	26	0	1	83	95	1	83	2e-32	114
DSM30011_11445	ENU57571.1 hypothetical protein F981_03549	Acinetobacter guillouiae CIP 63.46	T6SSI-main cluster	88	1	68.67	83	26	0	1	83	95	1	83	2e-32	114
DSM30011_11445	AGQ09556.1 hypothetical protein BJAB0868_01006	Acinetobacter baumannii BJAB0868		257	2c	87.10	62	8	0	25	86	71	2	63	7e-32	117
DSM30011_11445	AGQ05630.1 hypothetical protein BJAB0715_00984	Acinetobacter baumannii BJAB0715		257	2c	87.10	62	8	0	25	86	71	2	63	7e-32	117
DSM30011_11445	AGQ13368.1 hypothetical protein BJAB07104_01000	Acinetobacter baumannii BJAB07104		257	2c	87.10	62	8	0	25	86	71	2	63	7e-32	117
DSM30011_11445	AEP05456.1 conserve hypothetical protein	Acinetobacter baumannii MDR-ZJ06		257	2c	87.10	62	8	0	25	86	71	2	63	7e-32	117
DSM30011_11445	AMW80238.1 hypothetical protein AMD27_15920	Acinetobacter sp. TGL-Y2	orphan PAAR gene	88 (T6SS-1Bb)	1	65.06	83	29	0	1	83	95	1	83	3e-31	111
DSM30011_11445	AIS06600.1 membrane protein	Acinetobacter baumannii		249	2c	83.87	62	10	0	25	86	71	2	63	6e-31	114
DSM30011_11445	AIL80851.1 membrane protein	Acinetobacter baumannii		249	2c	83.87	62	10	0	25	86	71	2	63	6e-31	114
DSM30011_11445	KMV08050.1 PAAR motif family protein	Acinetobacter baumannii B8342	orphan PAAR gene	161	2a	82.26	62	11	0	25	86	71	2	63	1e-30	111
DSM30011_11445	ADI90764.1 hypothetical protein AOLE_09375	Acinetobacter oleivorans DR1		256	2c	82.26	62	11	0	25	86	71	2	63	2e-29	110
DSM30011_11445	AVN06025.1 PAAR motif family protein	Acinetobacter baumannii		256	2c	82.26	62	11	0	25	86	71	2	63	4e-29	109
DSM30011_11445	ATU23206.1 hypothetical protein AYP_001929	Acinetobacter baumannii		256	2c	82.26	62	11	0	25	86	71	2	63	4e-29	109
DSM30011_11445	AQU58820.1 hypothetical protein AXK18_17045	Acinetobacter baumannii		256	2c	82.26	62	11	0	25	86	71	2	63	4e-29	109
DSM30011_11445	APQ94849.1 hypothetical protein AOT18_08965	Acinetobacter baumannii		256	2c	82.26	62	11	0	25	86	71	2	63	4e-29	109
DSM30011_11445	APQ89138.1 hypothetical protein AOT17_08960	Acinetobacter baumannii		256	2c	82.26	62	11	0	25	86	71	2	63	4e-29	109
DSM30011_11445	APQ87196.1 hypothetical protein AOT16_08985	Acinetobacter baumannii		256	2c	82.26	62	11	0	25	86	71	2	63	4e-29	109
DSM30011_11445	APF45640.1 hypothetical protein BKJ37_09165	Acinetobacter baumannii		256	2c	82.26	62	11	0	25	86	71	2	63	4e-29	109
DSM30011_11445	AML72640.1 hypothetical protein AYR69_08885	Acinetobacter baumannii		256	2c	82.26	62	11	0	25	86	71	2	63	4e-29	109
DSM30011_11445	AML69069.1 hypothetical protein AYR68_08635	Acinetobacter baumannii		256	2c	82.26	62	11	0	25	86	71	2	63	4e-29	109
DSM30011_11445	AML65421.1 hypothetical protein AYR67_08975	Acinetobacter baumannii		256	2c	82.26	62	11	0	25	86	71	2	63	4e-29	109
DSM30011_11445	AKJ47763.1 membrane protein	Acinetobacter baumannii		256	2c	82.26	62	11	0	25	86	71	2	63	4e-29	109
DSM30011_11445	ANB88704.1 hypothetical protein SG90_009335	Acinetobacter baumannii ORAB01	orphan PAAR gene	256	2c	82.26	62	11	0	25	86	71	2	63	4e-29	109
DSM30011_11445	AIA52609.1 membrane protein	Acinetobacter baumannii		256	2c	82.26	62	11	0	25	86	71	2	63	4e-29	109
DSM30011_11445	AGQ10522.1 hypothetical protein BJAB0868_01973	Acinetobacter baumannii BJAB0868	orphan PAAR gene	256	2c	82.26	62	11	0	25	86	71	2	63	4e-29	109
DSM30011_11445	AGQ14272.1 hypothetical protein BJAB07104_01904	Acinetobacter baumannii BJAB07104		256	2c	82.26	62	11	0	25	86	71	2	63	4e-29	109
DSM30011_11445	AEP06474.1 conserve hypothetical protein	Acinetobacter baumannii MDR-ZJ06		256	2c	82.26	62	11	0	25	86	71	2	63	4e-29	109
DSM30011_11445	ADX92476.1 hypothetical protein ABTW07_2047	Acinetobacter baumannii TCDC-AB0715		256	2c	82.26	62	11	0	25	86	71	2	63	4e-29	109
DSM30011_11445	ADX03927.1 Putative uncharacterized protein	Acinetobacter baumannii 1656-2		256	2c	82.26	62	11	0	25	86	71	2	63	4e-29	109
DSM30011_11445	ADI90481.1 hypothetical protein AOLE_07950	Acinetobacter oleivorans DR1		256	2c	82.26	62	11	0	25	86	71	2	63	5e-29	109
DSM30011_11445	EPF74481.1 hypothetical protein F945_01520	Acinetobacter rudis CIP 110305	T6SSI-main cluster* (only 7 genes)	88	1	64.29	84	30	0	1	84	97	1	84	1e-28	104
DSM30011_11445	OBY75316.1 hypothetical protein NG55_01185	Acinetobacter gyllenbergii FMP01	orphan PAAR gene	97	2a	55.81	86	38	0	1	86	99	1	86	1e-26	99.8
DSM30011_11445	ESK56987.1 hypothetical protein F987_00269	Acinetobacter gyllenbergii NIPH 230	orphan PAAR gene	97	2a	54.65	86	39	0	1	86	99	1	86	2e-26	99.0
DSM30011_11445	ENV31552.1 hypothetical protein F960_03914	Acinetobacter gerneri DSM 14967 = CIP 107464	orphan PAAR gene (in proximity of tRNA-Arg)	346	2a	60.49	81	31	1	5	84	92	4	84	3e-23	94.7
DSM30011_11445	AVH13777.1 PAAR domain-containing protein	Acinetobacter indicus SGAir0564	orphan PAAR gene	88 (T6SS-1Bb)	1	39.29	84	51	0	1	84	97	1	84	9e-13	63.2
DSM30011_11445	ATO20820.1 hypothetical protein BS636_14585	Acinetobacter sp. LoGeW2-3	orphan PAAR gene	88 (T6SS-1Bb)	1	36.14	83	53	0	1	83	95	1	83	3e-11	58.9
DSM30011_11445	AUX89799.1 PAAR domain-containing protein	Acinetobacter sp. ACNIH1	orphan PAAR gene	88 (T6SS-1Bb)	1	39.76	83	50	0	1	83	95	1	83	6e-11	58.2
DSM30011_11445	APX62534.1 PAAR motif-containing protein	Acinetobacter schindleri ACE	orphan PAAR gene	88 (T6SS-1Bb)	1	34.94	83	54	0	1	83	95	1	83	2e-10	57.0
DSM30011_11445	AWD71061.1 PAAR domain-containing protein	Acinetobacter schindleri SGAir0122	orphan PAAR gene*	88 (T6SS-1Bb)	1	34.94	83	54	0	1	83	95	1	83	2e-10	56.6
DSM30011_11445	AUC08106.1 PAAR domain-containing protein	Acinetobacter lwoffii ZS207	orphan PAAR gene	88 (T6SS-1Bb)	1	37.35	83	52	0	1	83	95	1	83	2e-10	56.6
DSM30011_11445	AMW78104.1 hypothetical protein AMD27_03820	Acinetobacter sp. TGL-Y2	orphan PAAR gene	170	2a	40.00	80	47	1	6	84	91	5	84	3e-10	57.0
DSM30011_11445	ODA12802.1 hypothetical protein BBP83_09640	Acinetobacter celticus	orphan PAAR gene	88 (T6SS-1Bb)	1	36.90	84	53	0	1	84	97	1	84	2e-09	53.9
DSM30011_11445	ENV70502.1 hypothetical protein F947_00504	Acinetobacter towneri DSM 14962 = CIP 107472		186	2a	36.90	84	53	0	1	84	97	1	84	2e-09	54.7
DSM30011_11445	ALV73196.1 hypothetical protein RZ95_10030	Acinetobacter johnsonii XBB1	orphan PAAR gene	88 (T6SS-1Bb)	1	33.73	83	55	0	1	83	95	1	83	3e-09	53.5
DSM30011_11445	KYQ70790.1 hypothetical protein AZH43_03465	Acinetobacter pragensis	orphan PAAR gene	88 (T6SS-1Bb)	1	34.52	84	55	0	1	84	97	1	84	4e-09	53.1
DSM30011_11445	CAP02070.1 conserved hypothetical protein; putative phage-related protein	Acinetobacter baumannii SDF		177	2a	41.25	80	47	0	4	83	92	3	82	5e-09	53.9
DSM30011_11445	CUW34121.1 phage-like protein	Acinetobacter baumannii		177	2a	41.25	80	47	0	4	83	92	3	82	5e-09	53.5
DSM30011_11445	CRL93438.1 phage-like protein	Acinetobacter baumannii		177	2a	41.25	80	47	0	4	83	92	3	82	5e-09	53.5
DSM30011_11445	SFS74195.1 Zn-binding Pro-Ala-Ala-Arg (PAAR) domain-containing protein, incolved in TypeVI secretion	Acinetobacter bohemicus ANC 5076	orphan PAAR gene	88 (T6SS-1Bb)	1	34.52	84	55	0	1	84	97	1	84	7e-09	52.4
DSM30011_11445	ADY81874.1 hypothetical protein BDGL_001288	Acinetobacter pittii PHEA-2	orphan PAAR gene	177	2a	39.51	81	49	0	4	84	93	3	83	1e-08	52.4
DSM30011_11445	CAP02972.1 hypothetical protein ABSDF_p20032 (plasmid)	Acinetobacter baumannii SDF	orphan PAAR gene (plasmidic)	200	2a	41.25	80	46	1	6	84	91	5	84	1e-08	52.8
DSM30011_11445	PKF35507.1 PAAR domain-containing protein	Acinetobacter proteolyticus		178	2a	38.75	80	48	1	6	84	91	5	84	3e-08	51.6
DSM30011_11445	AHB92538.1 paar motif family protein	Acinetobacter baumannii ZW85-1		177	2a	40.00	80	48	0	4	83	92	3	82	3e-08	51.6
DSM30011_11445	ENU19338.1 hypothetical protein F994_02197	Acinetobacter bohemicus ANC 3994	orphan PAAR gene	88 (T6SS-1Bb)	1	33.33	84	56	0	1	84	97	1	84	3e-08	50.8
DSM30011_11445	ENV82500.1 hypothetical protein F941_01884	Acinetobacter bouvetii DSM 14964 = CIP 107468	orphan PAAR gene	88 (T6SS-1Bb)	1	32.14	84	57	0	1	84	97	1	84	4e-08	50.4
DSM30011_11445	OBY73307.1 hypothetical protein NG55_15960	Acinetobacter gyllenbergii FMP01	orphan PAAR gene (associated to putative effector gene-VRR_Nuc domain)	179	2a	40.70	86	48	2	1	84	97	1	85	2e-07	49.3
DSM30011_11445	ESK36633.1 hypothetical protein F987_03769	Acinetobacter gyllenbergii NIPH 230	orphan PAAR gene (associated to putative effector gene-VRR_Nuc domain)	179	2a	40.70	86	48	2	1	84	97	1	85	2e-07	49.3
DSM30011_11445	SNQ29620.1 Zn-binding Pro-Ala-Ala-Arg (PAAR) domain-containing protein, incolved in TypeVI secretion	Acinetobacter apis	orphan PAAR gene	88 (T6SS-1Bb)	1	39.73	73	44	0	12	84	84	11	83	3e-07	47.8
DSM30011_11445	AVH13769.1 hypothetical protein CTZ23_05410	Acinetobacter indicus		284	2b	38.36	73	45	0	9	81	84	9	81	6e-07	49.3
DSM30011_11445	AMW78901.1 hypothetical protein AMD27_08435	Acinetobacter sp. TGL-Y2		275	2a	35.80	81	52	0	6	86	93	5	85	6e-07	49.3
DSM30011_11445	PPZ93328.1 PAAR domain-containing protein	Acinetobacter ursingii		174	2a	34.18	79	51	1	6	83	90	5	83	6e-07	47.8
DSM30011_11445	PMC97304.1 PAAR domain-containing protein	Acinetobacter ursingii		174	2a	34.18	79	51	1	6	83	90	5	83	6e-07	47.8
DSM30011_11445	OUY08250.1 hypothetical protein CAP51_01105	Acinetobacter populi	T6SSII-main cluster	87	1	37.04	81	51	0	1	81	93	1	81	7e-07	47.0
DSM30011_11445	OBY73915.1 hypothetical protein NG55_12090	Acinetobacter gyllenbergii FMP01		171	2b	35.00	80	51	1	5	83	91	4	83	8e-07	47.4
DSM30011_11445	ENV33195.1 hypothetical protein F960_02561	Acinetobacter gerneri DSM 14967 = CIP 107464	orphan PAAR gene	86 (T6SS-1Bb)	1	32.91	79	53	0	6	84	91	5	83	1e-06	46.2
DSM30011_11445	ENV70927.1 hypothetical protein F947_00211	Acinetobacter towneri DSM 14962 = CIP 107472	orphan PAAR gene*	88 (T6SS-1Bb)	1	33.33	84	56	0	1	84	97	1	84	2e-06	45.8
DSM30011_11445	ENV15804.1 hypothetical protein F964_03666	Acinetobacter guillouiae NIPH 991		184	2a	36.71	79	49	1	6	83	90	5	83	2e-06	46.6
DSM30011_11445	ENX34393.1 hypothetical protein F889_01675	Acinetobacter colistiniresistens		176	2a	35.00	80	51	1	6	84	91	5	84	5e-06	45.4
DSM30011_11445	ENV33874.1 hypothetical protein F960_01880	Acinetobacter gerneri DSM 14967 = CIP 107464	T6SSII-main cluster	88	1	31.76	85	58	0	1	85	98	1	85	6e-06	44.3
DSM30011_11445	EPG36858.1 hypothetical protein F907_02555	Acinetobacter colistiniresistens		176	2a	35.00	80	51	1	6	84	91	5	84	7e-06	45.1
DSM30011_11445	ATZ64949.1 hypothetical protein BSR55_17215	Acinetobacter bereziniae		177	2a	37.50	80	49	1	1	79	91	1	80	8e-06	44.7
DSM30011_11445	ATZ62304.1 hypothetical protein BSR55_02570	Acinetobacter bereziniae		177	2a	37.50	80	49	1	1	79	91	1	80	1e-05	44.7
DSM30011_11445	PKF32710.1 hypothetical protein CW311_13280	Acinetobacter proteolyticus		171	2b	33.75	80	52	1	5	83	91	4	83	1e-05	44.3
DSM30011_11445	ENV17008.1 hypothetical protein F964_02757	Acinetobacter guillouiae NIPH 991		183	2b	44.64	56	31	0	29	84	64	29	84	2e-05	44.3
DSM30011_11445	ESK36764.1 hypothetical protein F987_03577	Acinetobacter gyllenbergii NIPH 230		185	2a	46.94	49	26	0	36	84	56	36	84	2e-05	44.3
DSM30011_11445	EPF71004.1 hypothetical protein F945_02767	Acinetobacter rudis CIP 110305		176	2a	36.78	87	47	2	1	84	97	1	82	2e-05	43.9
DSM30011_11445	EPG34566.1 hypothetical protein F907_03484	Acinetobacter colistiniresistens		181	2b	31.25	80	54	1	5	83	91	4	83	2e-05	43.9
DSM30011_11445	OBY73737.1 hypothetical protein NG55_13860	Acinetobacter gyllenbergii		176	2a	32.50	80	53	1	6	84	91	5	84	3e-05	43.5
DSM30011_11445	ESK41599.1 hypothetical protein F987_02338	Acinetobacter gyllenbergii NIPH 230	orphan PAAR gene	144	2a	32.50	80	53	1	6	84	91	5	84	3e-05	42.7
DSM30011_11445	BAP35365.1 hypothetical protein AS4_04250	Acinetobacter guillouiae		174	2a	44.90	49	27	0	36	84	56	36	84	4e-05	43.1
DSM30011_11445	ENV18037.1 hypothetical protein F964_01356	Acinetobacter guillouiae NIPH 991		168	2a	44.90	49	27	0	36	84	56	36	84	5e-05	42.7
DSM30011_11445	ENV32392.1 hypothetical protein F960_03791	Acinetobacter gerneri DSM 14967 = CIP 107464		278	2a	42.86	49	28	0	36	84	56	35	83	5e-05	43.5
DSM30011_11445	CAP00799.1 conserved hypothetical protein	Acinetobacter baumannii SDF	orphan PAAR gene	133	5	40.85	71	40	2	9	78	80	39	108	8e-05	41.6
DSM30011_11445	ENU57922.1 hypothetical protein F981_02209	Acinetobacter guillouiae CIP 63.46		187	2a	44.90	49	27	0	36	84	56	36	84	9e-05	42.4
DSM30011_11445	ESK54751.1 hypothetical protein F987_00711	Acinetobacter gyllenbergii NIPH 230		174	2a	39.29	84	49	1	1	84	97	1	82	9e-05	42.0
DSM30011_11445	KMV24725.1 PAAR motif family protein	Acinetobacter baumannii		96	2a	42.86	49	28	0	36	84	56	36	84	9e-05	40.8
DSM30011_11445	ACC57458.1 hypothetical protein ACICU_02146	Acinetobacter baumannii ACICU		142	5	40.85	71	40	2	9	78	80	48	117	0.0001	41.2
DSM30011_11445	CAP00798.1 conserved hypothetical protein	Acinetobacter baumannii SDF	orphan PAAR gene	179	2a	30.95	84	58	0	1	84	97	1	84	0.0001	41.6
DSM30011_11445	AMW78666.1 hypothetical protein AMD27_07050	Acinetobacter sp. TGL-Y2		176	2a	35.00	80	51	1	6	84	91	5	84	0.0001	41.6
DSM30011_11445	ATZ64175.1 hypothetical protein BSR55_12775	Acinetobacter bereziniae		177	2a	29.76	84	59	0	1	84	97	1	84	0.0001	41.6
DSM30011_11445	ENV34234.1 hypothetical protein F960_01552	Acinetobacter gerneri DSM 14967 = CIP 107464		259	2a	35.44	79	51	0	9	87	91	8	86	0.0002	42.0
DSM30011_11445	ACC57459.1 putative bacteriophage	Acinetobacter baumannii ACICU		183	2a	32.14	84	57	0	1	84	97	1	84	0.0002	41.6
DSM30011_11445	ENU58141.1 hypothetical protein F981_02429	Acinetobacter guillouiae CIP 63.46		172	2a	46.94	49	26	0	36	84	56	36	84	0.0003	40.4
DSM30011_11445	ENU60235.1 hypothetical protein F981_00706	Acinetobacter guillouiae CIP 63.46	orphan PAAR gene	399	2b	41.07	56	33	0	29	84	64	29	84	0.0003	41.6
DSM30011_11445	ESK38927.1 hypothetical protein F987_02941	Acinetobacter gyllenbergii NIPH 230		168	2a	35.53	76	49	0	9	84	87	8	83	0.0004	40.4
DSM30011_11445	EPF74385.1 hypothetical protein F945_01598	Acinetobacter rudis CIP 110305	T6SSII-main cluster	88	1	28.40	81	58	0	1	81	93	1	81	0.0004	38.9
DSM30011_11445	ATZ64702.1 hypothetical protein BSR55_15800	Acinetobacter bereziniae		172	2a	44.90	49	27	0	36	84	56	36	84	0.0006	39.7
DSM30011_11445	APV37730.1 hypothetical protein BEN76_16925 (plasmid)	Acinetobacter soli		186	2a	30.95	84	58	0	1	84	97	1	84	1	38.9
DSM30011_11445	CAP02689.1 conserved hypothetical protein	Acinetobacter baumannii SDF	orphan PAAR gene	183	2b	30.95	84	58	0	1	84	97	1	84	1	38.9
DSM30011_11445	PMC98265.1 PAAR domain-containing protein	Acinetobacter ursingii		181	2a	34.67	75	49	0	1	75	86	1	75	1	38.9
DSM30011_11445	ENV80969.1 hypothetical protein F942_00120	Acinetobacter ursingii ANC 3649		181	2a	34.67	75	49	0	1	75	86	1	75	1	38.9
DSM30011_11445	ENV53089.1 hypothetical protein F952_02918	Acinetobacter baylyi DSM 14961 = CIP 107474		182	2a	30.95	84	58	0	1	84	97	1	84	2	38.5
DSM30011_11445	CAG67034.1 conserved hypothetical protein; putative bacteriophage	Acinetobacter sp. ADP1		182	2a	30.95	84	58	0	1	84	97	1	84	2	38.5
DSM30011_11445	EPF74631.1 hypothetical protein F945_01398	Acinetobacter rudis CIP 110305		190	2a	33.78	74	49	0	9	82	85	8	81	3	38.1
DSM30011_11445	OBY74237.1 hypothetical protein NG55_10400	Acinetobacter gyllenbergii		171	2a	38.78	49	30	0	36	84	56	35	83	6	37.0
DSM30011_11445	AOA58291.1 hypothetical protein BFG52_07915	Acinetobacter larvae		172	2a	33.78	74	49	0	11	84	85	10	83	8	36.6
DSM30011_11445	EPF79737.1 hypothetical protein F945_00625	Acinetobacter rudis CIP 110305	orphan PAAR gene	368	2a	32.47	77	52	0	11	87	89	11	87	14	36.6
DSM30011_11445	AVN22876.1 PAAR domain-containing protein	Acinetobacter pittii		179	2a	32.14	84	57	0	1	84	97	1	84	14	36.2
DSM30011_11445	AQV15643.1 hypothetical protein BMU11_08770	Acinetobacter pittii		172	2a	38.78	49	30	0	36	84	56	36	84	14	35.8
DSM30011_11445	AMM28735.1 hypothetical protein AYJ52_09960	Acinetobacter pittii		177	2a	32.14	84	57	0	1	84	97	1	84	15	35.8
DSM30011_11445	ARN31857.1 hypothetical protein A4U85_14235	Acinetobacter baumannii		172	2a	36.73	49	31	0	36	84	56	36	84	23	35.4
DSM30011_11445	CAP02688.1 conserved hypothetical protein	Acinetobacter baumannii SDF	orphan PAAR gene	161	5	33.80	71	45	2	9	78	80	67	136	26	35.0
DSM30011_11445	CAP00084.1 hypothetical protein ABSDF0708	Acinetobacter baumannii SDF	orphan PAAR gene	278	2a	36.73	49	31	0	36	84	56	35	83	57	34.7
DSM30011_11445	CAP01151.1 conserved hypothetical protein	Acinetobacter baumannii SDF		178	2a	36.73	49	31	0	36	84	56	35	83	60	34.3
DSM30011_11445	SCD15077.1 putative bacteriophage	Acinetobacter calcoaceticus		172	2a	29.76	84	59	0	1	84	97	1	84	62	34.3
DSM30011_11445	AJB67794.1 hypothetical protein RU84_13195	Acinetobacter baumannii		172	2a	29.76	84	59	0	1	84	97	1	84	65	34.3
DSM30011_11445	ATI37893.1 hypothetical protein BS103_04545	Acinetobacter baumannii		197	2a	29.76	84	59	0	1	84	97	1	84	81	33.9
DSM30011_11445	ATZ64701.1 hypothetical protein BSR55_15795	Acinetobacter bereziniae		148	5	36.71	79	46	3	9	84	87	48	125	0.14	33.1
DSM30011_11445	ATZ65096.1 hypothetical protein BSR55_18060	Acinetobacter bereziniae		148	5	36.05	86	50	4	2	83	94	40	124	0.27	32.3
DSM30011_11445	AVH13768.1 hypothetical protein CTZ23_05405	Acinetobacter indicus		149	5	27.14	70	51	0	9	78	80	48	117	0.63	31.2
DSM30011_11445	EPF72148.1 hypothetical protein F945_02200	Acinetobacter rudis CIP 110305		125	2a	54.17	24	11	0	61	84	28	5	28	0.89	30.8
DSM30011_11445	ENV32391.1 hypothetical protein F960_03790	Acinetobacter gerneri DSM 14967 = CIP 107464		144	5	39.02	41	24	1	3	42	46	41	81	9.7	28.1
Query gene acc. No	Subject protein accession and description	Organism	Co-occurrence with another PAAR gene	Length (AA)	Classification (according to Shneider et al., 2013)	% identity	alignment length	mismatches	gap opens	q. start	q. end	q. cov	s. start	s. end	evalue	bit score
CAG67033.1	CAG67033.1 conserved hypothetical protein [Acinetobacter sp. ADP1]		5+”2a”	151	5	100.00	151	0	0	1	151	100	1	151	4e-107	308
CAG67033.1	ENV53090.1 hypothetical protein F952_02919 [Acinetobacter baylyi DSM 14961 = CIP 107474]		5+”2a”	147	5	100.00	147	0	0	5	151	97	1	147	2e-103	299
CAG67033.1	APV37731.1 hypothetical protein BEN76_16930 (plasmid) [Acinetobacter soli]		5+”2a”	147	5	91.84	147	12	0	5	151	97	1	147	3e-94	276
CAG67033.1	ENV17007.1 hypothetical protein F964_02756 [Acinetobacter guillouiae NIPH 991]		5+”2b”	147	5	75.51	147	36	0	5	151	97	1	147	2e-76	231
CAG67033.1	ATZ65096.1 hypothetical protein BSR55_18060 [Acinetobacter bereziniae]		5+”2a”	148	5	74.32	148	37	1	5	151	97	1	148	1e-74	226
CAG67033.1	ENU57923.1 hypothetical protein F981_02210 [Acinetobacter guillouiae CIP 63.46]		5+”2a”	147	5	72.11	147	41	0	5	151	97	1	147	5e-74	224
CAG67033.1	ATZ64701.1 hypothetical protein BSR55_15795 [Acinetobacter bereziniae]		5+”2a”	148	5	66.89	148	48	1	5	151	97	1	148	2e-68	210
CAG67033.1	OBY74440.1 hypothetical protein NG55_11545 [Acinetobacter gyllenbergii]		5+”2a” (pseudogene)	147	5	66.91	139	46	0	5	143	92	1	139	8e-63	196
CAG67033.1	APR69353.1 hypothetical protein AHTJS_02420 [Acinetobacter haemolyticus]		5+”2a” (pseudogene)	151	5	69.34	137	41	1	7	143	91	2	137	8e-62	193
CAG67033.1	ATI37892.1 hypothetical protein BS103_04540 [Acinetobacter baumannii]		5+”2a”	142	5	63.31	139	51	0	5	143	92	1	139	5e-61	191
CAG67033.1	SCD15076.1 Uncharacterized conserved protein [Acinetobacter calcoaceticus]		5+”2a”	142	5	63.31	139	51	0	5	143	92	1	139	6e-61	191
CAG67033.1	ACC57458.1 hypothetical protein ACICU_02146 [Acinetobacter baumannii ACICU]		5+”2a”	142	5	61.97	142	54	0	5	146	94	1	142	1e-59	187
CAG67033.1	ARN31858.1 hypothetical protein A4U85_14240 [Acinetobacter baumannii]		5+”2a”	146	5	60.71	140	55	0	5	144	93	1	140	1e-58	185
CAG67033.1	AQV15642.1 hypothetical protein BMU11_08765 [Acinetobacter pittii]		5+”2a”	142	5	61.15	139	54	0	5	143	92	1	139	7e-58	183
CAG67033.1	AMM28734.1 hypothetical protein AYJ52_09955 [Acinetobacter pittii]		5+”2a”	142	5	60.43	139	55	0	5	143	92	1	139	4e-57	181
CAG67033.1	AVN22877.1 hypothetical protein C6N17_14655 [Acinetobacter pittii]		5+”2a”	142	5	59.71	139	56	0	5	143	92	1	139	5e-56	178
CAG67033.1	AJB67795.1 hypothetical protein RU84_13200 [Acinetobacter baumannii]		5+”2a”	142	5	60.43	139	55	0	5	143	92	1	139	7e-56	178
CAG67033.1	OBY74238.1 hypothetical protein NG55_10405 [Acinetobacter gyllenbergii]		5+”2a”	142	5	57.55	139	59	0	5	143	92	1	139	6e-55	176
CAG67033.1	CAP00799.1 conserved hypothetical protein [Acinetobacter baumannii SDF]		5+”2a”	133	5	59.40	133	54	0	14	146	88	1	133	5e-53	170
CAG67033.1	KMV24726.1 PAAR motif family protein [Acinetobacter baumannii]		5+”2a”	142	5	55.40	139	62	0	5	143	92	1	139	5e-50	163
CAG67033.1	AVH13768.1 hypothetical protein CTZ23_05405 [Acinetobacter indicus]		5+”2b”	149	5	53.57	140	65	0	5	144	93	1	140	4e-49	161
CAG67033.1	ENV32391.1 hypothetical protein F960_03790 [Acinetobacter gerneri DSM 14967 = CIP 107464]		5+”2a”	144	5	55.40	139	62	0	5	143	92	1	139	4e-46	153
CAG67033.1	ENU58140.1 hypothetical protein F981_02428 [Acinetobacter guillouiae CIP 63.46]		5+”2a”	104	5	53.06	147	26	1	5	151	97	1	104	2e-44	147
CAG67033.1	CAP02688.1 conserved hypothetical protein [Acinetobacter baumannii SDF]		5+”2b”	161	5	46.76	139	74	0	5	143	92	20	158	3e-39	136
CAG67033.1	BAP35364.1 hypothetical protein AS4_04240 [Acinetobacter guillouiae]		5+”2a”	143	5	44.29	140	77	1	5	143	92	1	140	1e-31	116
CAG67033.1	ENV18036.1 hypothetical protein F964_01355 [Acinetobacter guillouiae NIPH 991]		5+”2a”	143	5	43.57	140	78	1	5	143	92	1	140	2e-31	115
CAG67033.1	ENU60236.1 hypothetical protein F981_00707 [Acinetobacter guillouiae CIP 63.46]		5+”2b”	143	5	42.86	140	79	1	5	143	92	1	140	4e-30	112
CAG67033.1	OBY74300.1 hypothetical protein NG55_10750 [Acinetobacter gyllenbergii]		5+”2a” (pseudogene)	140	5	41.41	128	74	1	17	143	84	10	137	4e-27	104
CAG67033.1	ESK36763.1 hypothetical protein F987_03576 [Acinetobacter gyllenbergii NIPH 230]		5+”2a”	140	5	40.46	131	77	1	14	143	86	7	137	3e-25	99.4
