# Supplementary material for: Bioinformatic Analysis of the Type VI Secretion System and Its Potential Toxins in the Acinetobacter Genus
Source: Front Microbiol. 2019 Nov 1;10:2519. doi: 10.3389/fmicb.2019.02519 (PMC6838775; doi:10.3389/fmicb.2019.02519)
Supplement: TABLE S6 — BlastP-homology search for toxins in PAAR and vgrG genetic islands in Acinetobacter spp. [file Table_6.XLS]

## Sheet: Sheet1
Table S6. BlastP-homology search for toxins in PAAR and vgrG genetic islands in Acinetobacter spp.
BlastP-homology search for toxins in PAAR gene neighbourhoods in Acinetobacter spp.
Query gene acc. No	Query description	Subject protein accession and description (1)	Comments	% identity	alignment length	mismatches	gap opens	q. start	q. end	q. cov	s. start	s. end	evalue	bit score	(1) Subject proteins appearing more than once are shown the same color
WP_004930875.1	Metallopeptidase Tpe1 [Acinetobacter baylyi ADP1]	ENV53088.1 hypothetical protein F952_02917 [Acinetobacter baylyi DSM 14961 = CIP 107474]	Co-occurrence with PAAR5-PAAR-2 gene tandem	100.00	210	0	0	1	210	100	1	210	4e-155	429
WP_004930875.1		CAG67035.1 hypothetical protein; putative zinc protease [Acinetobacter sp. ADP1]	Co-occurrence with PAAR5-PAAR-2 gene tandem	100.00	210	0	0	1	210	100	1	210	4e-155	429
WP_004930875.1		AVN22875.1 peptidase [Acinetobacter pittii]	Co-occurrence with PAAR5-PAAR-2 gene tandem	83.92	199	32	0	1	199	95	1	199	7e-127	357
WP_004930875.1		KMV24722.1 hypothetical protein AB987_0093 [Acinetobacter baumannii]	Co-occurrence with PAAR5-PAAR-2 gene tandem	56.31	206	82	5	13	210	94	13	218	6e-71	216
WP_004930875.1		SCD15078.1 zinc protease [Acinetobacter calcoaceticus]	Co-occurrence with PAAR5-PAAR-2 gene tandem	44.95	218	110	4	1	209	99	1	217	2e-56	179
WP_004930875.1		AJB67793.1 hypothetical protein RU84_13190 [Acinetobacter baumannii]	Co-occurrence with PAAR5-PAAR-2 gene tandem	44.95	218	110	4	1	209	99	1	217	2e-56	179
WP_004930875.1		AMM28736.1 hypothetical protein AYJ52_09965 [Acinetobacter pittii]	Co-occurrence with PAAR5-PAAR-2 gene tandem	44.64	224	95	7	1	209	99	1	210	2e-52	168
WP_004930875.1		ENX34300.1 hypothetical protein F889_02064 [Acinetobacter colistiniresistens]	Co-occurrence with PAAR-2 gene in the T6SS-main cluster	33.70	181	96	9	5	171	80	13	183	7e-22	87.8
WP_004930875.1		BAP35366.1 hypothetical protein AS4_04260 [Acinetobacter guillouiae]	Co-occurrence with PAAR5-PAAR-2 gene tandem	32.74	168	95	6	14	170	75	24	184	1e-20	84.0
WP_004930875.1		APR69968.1 zinc protease [Acinetobacter haemolyticus]	Co-occurrence with PAAR-2 gene	35.67	171	87	8	14	171	75	24	184	2e-20	84.0
WP_004930875.1		ARG18756.1 zinc protease [Acinetobacter nosocomialis]	Co-occurrence with PAAR-2 gene	34.12	170	90	8	14	171	75	19	178	2e-20	83.6
WP_004930875.1		AWL18531.1 zinc protease [Acinetobacter nosocomialis]	Co-occurrence with PAAR-2 gene	34.12	170	90	8	14	171	75	24	183	2e-20	83.6
WP_004930875.1		AVF43519.1 zinc protease [Acinetobacter nosocomialis]	Co-occurrence with PAAR-2 gene	34.12	170	90	8	14	171	75	24	183	2e-20	83.6
WP_004930875.1		ARD27798.1 hypothetical protein OTEC02_02770 [Acinetobacter lactucae]	Co-occurrence with PAAR-2 gene	30.05	193	108	7	2	186	88	13	186	4e-18	77.0
WP_004930875.1		CAP00407.1 conserved hypothetical protein [Acinetobacter baumannii SDF]	Co-occurrence with PAAR-2 gene	30.51	177	106	6	18	186	80	19	186	9e-18	75.9
WP_004930875.1		AQV15644.1 hypothetical protein BMU11_08775 [Acinetobacter pittii]	Co-occurrence with PAAR5-PAAR-2 gene tandem	33.12	157	85	6	30	174	69	49	197	2e-15	69.3
WP_004930875.1		ARN31856.1 hypothetical protein A4U85_14230 [Acinetobacter baumannii]	Co-occurrence with PAAR5-PAAR-2 gene tandem	33.12	157	85	6	30	174	69	44	192	2e-15	69.3
WP_004930875.1		ENV15803.1 hypothetical protein F964_03665 [Acinetobacter guillouiae NIPH 991]	Co-occurrence with PAAR-2 gene	28.64	199	100	7	2	173	82	28	211	4e-14	65.9
WP_004930875.1		OBY74236.1 hypothetical protein NG55_10395 [Acinetobacter gyllenbergii]	Co-occurrence with PAAR5-PAAR-2 gene tandem	31.21	157	88	6	30	174	69	44	192	1e-13	63.9
WP_004930875.1		PMC97305.1 zinc protease, partial [Acinetobacter ursingii]	Co-occurrence with PAAR-2 gene	32.61	92	47	4	88	170	40	6	91	2e-07	45.1
ACJ56263.1	Protein rhsD precursor Rhs1 [Acinetobacter baumannii AB307-0294]	EPF74236.1 hypothetical protein F945_01603 [Acinetobacter rudis CIP 110305]	Rhs toxin (RhsA+RHS_repeat domains) encoded in a vgrG island	58.96	1535	592	12	1	1526	96	1	1506	0.0	1838
ACJ56263.1		SNQ29618.1 RHS repeat-associated core domain-containing protein [Acinetobacter apis]	Rhs toxin (RhsA+YwqJ-deaminase domains) encoded in a vgrG island	33.97	1472	829	34	45	1397	85	34	1481	0.0	758
ACJ56263.1		ENV33198.1 hypothetical protein F960_02564 [Acinetobacter gerneri DSM 14967 = CIP 107464]	PAAR-3 (DUF4150+RhsA+Tox-ART-HYD1 domains) encoded in a vgrG island	29.11	948	476	28	631	1395	48	620	1554	7e-84	301
ACJ56464.1	Rhs2_nuclease_[Acinetobacter baumannii AB307-0294]	SNQ29618.1 RHS repeat-associated core domain-containing protein [Acinetobacter apis]	Rhs toxin (RhsA+YwqJ-deaminase domains) encoded in a vgrG island	51.16	1509	687	18	5	1496	92	4	1479	0.0	1545
ACJ56464.1		EPF74236.1 hypothetical protein F945_01603 [Acinetobacter rudis CIP 110305]	Rhs toxin (RhsA+RHS_repeat domains) encoded in a vgrG island	32.29	1499	826	35	35	1497	90	43	1388	0.0	701
ACJ56464.1		ENV33198.1 hypothetical protein F960_02564 [Acinetobacter gerneri DSM 14967 = CIP 107464]	PAAR-3 (DUF4150+RhsA+Tox-ART-HYD1 domains) encoded in a vgrG island	28.73	1006	499	27	671	1510	52	615	1568	5e-93	330
ABC38949.1	Tle1 phospholipases (DUF2235 superfamily)	EPF74387.1 hypothetical protein F945_01600 [Acinetobacter rudis CIP 110305]	Next to T6SS-2 cluster (vgrG island)	30.90	178	90	7	213	382	32	99	251	2e-10	60.5
ABV40898.1		EPF74387.1 hypothetical protein F945_01600 [Acinetobacter rudis CIP 110305]	Next to T6SS-2 cluster (vgrG island)	32.88	146	65	5	237	380	18	138	252	3e-10	59.7
CAU99379.1		EPF74387.1 hypothetical protein F945_01600 [Acinetobacter rudis CIP 110305]	Next to T6SS-2 cluster (vgrG island)	30.72	293	121	12	36	318	51	32	252	2e-21	94.4
AEN64673.1		EPF74387.1 hypothetical protein F945_01600 [Acinetobacter rudis CIP 110305]	Next to T6SS-2 cluster (vgrG island)	30.85	188	84	7	194	379	23	108	251	3e-10	60.1
AGB81986.1		EPF74387.1 hypothetical protein F945_01600 [Acinetobacter rudis CIP 110305]	Next to T6SS-2 cluster (vgrG island)	30.41	148	66	4	240	383	18	138	252	5e-09	55.8
AHM72170.1		EPF74387.1 hypothetical protein F945_01600 [Acinetobacter rudis CIP 110305]	Next to T6SS-2 cluster (vgrG island)	31.50	200	92	10	187	379	24	90	251	2e-08	53.9
AIU87498.1		EPF74387.1 hypothetical protein F945_01600 [Acinetobacter rudis CIP 110305]	Next to T6SS-2 cluster (vgrG island)	35.92	142	64	6	238	379	18	138	252	5e-13	68.6
AJE87774.1		EPF74387.1 hypothetical protein F945_01600 [Acinetobacter rudis CIP 110305]	Next to T6SS-2 cluster (vgrG island)	30.77	156	79	3	228	383	19	126	252	3e-10	60.1
AKL04938.1		EPF74387.1 hypothetical protein F945_01600 [Acinetobacter rudis CIP 110305]	Next to T6SS-2 cluster (vgrG island)	33.33	141	67	6	238	378	18	138	251	4e-11	62.4
ALR28087.1		EPF74387.1 hypothetical protein F945_01600 [Acinetobacter rudis CIP 110305]	Next to T6SS-2 cluster (vgrG island)	30.91	165	83	4	223	387	20	119	252	2e-10	60.5
AHJ76600.2	Lysozyme_like domain containing protein [Enterobacter sacchari]	ENV70924.1 hypothetical protein F947_00207 [Acinetobacter towneri DSM 14962 = CIP 107472]		23.84	172	82	4	474	635	23	340	472	2e-05	44.3
KKA54520.1	UP01_21690 Tae4 amidase [Enterobacter cloacae MNCRE16]	ATI37894.1 hypothetical protein BS103_04550 [Acinetobacter baumannii]	Co-occurrence with PAAR5-PAAR-2 gene tandem	24.86	181	99	10	2	164	99	20	181	1e-05	40.4
KKA54520.1		PKF35508.1 hypothetical protein CW311_04255 [Acinetobacter proteolyticus]		28.35	127	69	5	31	136	65	39	164	5e-05	38.9
KKA54520.1		ENX34392.1 hypothetical protein F889_01674 [Acinetobacter colistiniresistens]		29.91	117	59	6	42	136	58	51	166	9e-05	38.1
KKA54520.1		ESK41600.1 hypothetical protein F987_02339 [Acinetobacter gyllenbergii NIPH 230]		29.91	117	59	6	42	136	58	51	166	9e-05	38.1
KKA54520.1		EPG36859.1 hypothetical protein F907_02556 [Acinetobacter colistiniresistens]		29.91	117	59	6	42	136	58	51	166	9e-05	38.1
AAK89757.1	Atu3640 Tde2 DNAse [Agrobacterium fabrum str. C58]	ENV33198.1 hypothetical protein F960_02564 [Acinetobacter gerneri DSM 14967 = CIP 107464]	PAAR-3 (DUF4150+RhsA+Tox-ART-HYD1 domains) encoded in a vgrG island	30.00	210	122	6	35	233	38	15	210	3e-16	78.6
NP_356308.2	Atu4347 Tde [Agrobacterium fabrum str. C58]	CAP02973.1 conserved hypothetical protein (plasmid) [Acinetobacter baumannii SDF]		23.84	172	103	7	5	161	95	22	180	3e-06	42.0
NP_356308.2		ATI37894.1 hypothetical protein BS103_04550 [Acinetobacter baumannii]	Co-occurrence with PAAR-2 gene	21.39	173	106	9	5	161	95	23	181	0.0002	36.6
NP_356308.2		PKF35508.1 hypothetical protein CW311_04255 [Acinetobacter proteolyticus]		24.23	194	96	7	3	161	96	29	206	0.0006	35.8
NP_356308.2		OBY73738.1 hypothetical protein NG55_13865 [Acinetobacter gyllenbergii]		26.55	113	62	4	43	134	55	56	168	0.0007	35.4
NP_797794.1	VP1415 [Vibrio parahaemolyticus RIMD 2210633]	ENV33198.1 hypothetical protein F960_02564 [Acinetobacter gerneri DSM 14967 = CIP 107464]	PAAR-3 (DUF4150+RhsA+Tox-ART-HYD1 domains) encoded in a vgrG island	32.73	110	74	0	29	138	15	7	116	5e-11	62.8
ADM97066.1	Rhs-family protein RhsA DNAse [Dickeya dadantii 3937]	SNQ29618.1 RHS repeat-associated core domain-containing protein [Acinetobacter apis]	Rhs toxin (RhsA+YwqJ-deaminase domains) encoded in a vgrG island	28.04	1002	550	39	460	1336	65	549	1504	4e-69	253
ADM97066.1		EPF74236.1 hypothetical protein F945_01603 [Acinetobacter rudis CIP 110305]	Rhs toxin (RhsA+RHS_repeat domains) encoded in a vgrG island	25.87	924	558	28	460	1302	59	510	1387	3e-57	215
ADM97066.1		ENV33198.1 hypothetical protein F960_02564 [Acinetobacter gerneri DSM 14967 = CIP 107464]	PAAR-3 (DUF4150+RhsA+Tox-ART-HYD1 domains) encoded in a vgrG island	22.58	744	445	25	506	1151	55	574	1284	9e-25	109
ADM97066.1		ENV33198.1 hypothetical protein F960_02564 [Acinetobacter gerneri DSM 14967 = CIP 107464]	PAAR-3 (DUF4150+RhsA+Tox-ART-HYD1 domains) encoded in a vgrG island	41.46	123	54	3	1207	1313	55	1445	1565	8e-20	93.2
BlastP-homology search for toxins in vgrG gene neighbourhoods in Acinetobacter spp.
Query gene acc. No	Query description	Subject protein accession and description (1)	Comments	% identity	alignment length	mismatches	gap opens	q. start	q. end	q. cov	s. start	s. end	evalue	bit score
AAG04899.1	Tle4 [Pseudomonas aeruginosa PAO1]	ENV15135.1 hypothetical protein F964_03857 [Acinetobacter guillouiae NIPH 991]		31.08	576	306	22	50	555	89	40	594	7e-61	212
ABC38949.1	Phospholipase [Burkholderia thailandensis E264]	APX61752.1 hypothetical protein AsACE_CH00305 [Acinetobacter schindleri]		34.21	266	137	10	238	477	42	152	405	1e-29	121
ABV40898.1	conserved hypothetical protein [Serratia proteamaculans 568]	ENV75491.1 hypothetical protein F944_02596 [Acinetobacter ursingii DSM 16037 = CIP 107286]		32.34	368	182	16	58	415	44	28	338	9e-35	137
ABV40898.1	conserved hypothetical protein [Serratia proteamaculans 568]	ADI91675.1 hypothetical protein AOLE_13940 [Acinetobacter oleivorans DR1]		30.65	372	180	15	58	415	44	28	335	5e-33	132
ACJ56013.1	LysM domain protein [Acinetobacter baumannii AB307-0294]	SQI48223.1 LysM domain protein [Acinetobacter baumannii]	NLPC/P60 domain (484-556)	100.00	582	0	0	1	582	100	1	582	0.0	1202
ACJ56013.1		AVN26956.1 LysM peptidoglycan-binding domain-containing protein [Acinetobacter baumannii]		100.00	582	0	0	1	582	100	1	582	0.0	1202
ACJ56013.1		AVN12890.1 LysM peptidoglycan-binding domain-containing protein [Acinetobacter baumannii]		100.00	582	0	0	1	582	100	1	582	0.0	1202
ACJ56013.1		ATY42587.1 LysM domain protein [Acinetobacter baumannii]		100.00	582	0	0	1	582	100	1	582	0.0	1202
ACJ56013.1		ATP88908.1 LysM domain protein [Acinetobacter baumannii]		100.00	582	0	0	1	582	100	1	582	0.0	1202
ACJ56013.1		ASF79084.1 LysM domain protein [Acinetobacter baumannii]		100.00	582	0	0	1	582	100	1	582	0.0	1202
ACJ56013.1		ASF49874.1 peptidoglycan-binding protein LysM [Acinetobacter baumannii AB0057]		100.00	582	0	0	1	582	100	1	582	0.0	1202
ACJ56013.1		ALJ86146.1 hypothetical protein AN415_00197 [Acinetobacter baumannii]		100.00	582	0	0	1	582	100	1	582	0.0	1202
ACJ56013.1		AKA29912.1 hypothetical protein ABUW_0117 [Acinetobacter baumannii]		100.00	582	0	0	1	582	100	1	582	0.0	1202
ACJ56013.1		AJF83487.1 LysM domain protein [Acinetobacter baumannii]		100.00	582	0	0	1	582	100	1	582	0.0	1202
ACJ56013.1		ACJ56013.1 LysM domain protein [Acinetobacter baumannii AB307-0294]		100.00	582	0	0	1	582	100	1	582	0.0	1202
ACJ56013.1		CAM85105.1 hypothetical protein ABAYE0119 [Acinetobacter baumannii AYE]		100.00	582	0	0	1	582	100	1	582	0.0	1202
ACJ56013.1		AJB65424.1 peptidoglycan-binding protein LysM [Acinetobacter baumannii]		99.14	582	5	0	1	582	100	1	582	0.0	1190
ACJ56013.1		AHB89841.1 LysM domain protein [Acinetobacter baumannii ZW85-1]		99.14	582	5	0	1	582	100	1	582	0.0	1190
ACJ56013.1		AWL17654.1 LysM domain-containing protein [Acinetobacter nosocomialis]		83.68	582	95	0	1	582	100	1	582	0.0	1018
ACJ56013.1		ARG15355.1 peptidoglycan-binding protein LysM [Acinetobacter nosocomialis]		83.68	582	95	0	1	582	100	1	582	0.0	1018
ACJ56013.1		SFT14433.1 LysM domain-containing protein [Acinetobacter bohemicus]		35.29	153	95	4	4	155	65	2	151	3e-16	79.7
ACJ56013.1		SFT14433.1 LysM domain-containing protein [Acinetobacter bohemicus]		32.19	292	161	5	113	381	65	178	455	3e-28	117
ACJ56013.1		ARG22296.1 peptidoglycan-binding protein [Acinetobacter baumannii]		31.46	569	297	21	7	509	86	12	553	8e-63	218
ACJ56263.1	Protein rhsD precursor Rhs1 [Acinetobacter baumannii AB307-0294]	SQI56830.1 Rhs family protein [Acinetobacter baumannii]	toxin domain not detected	100.00	1590	0	0	1	1590	100	1	1590	0.0	3306
ACJ56263.1		AVN13713.1 type IV secretion protein Rhs [Acinetobacter baumannii]		100.00	1590	0	0	1	1590	100	1	1590	0.0	3306
ACJ56263.1		ATY44872.1 Putative deoxyribonuclease RhsC [Acinetobacter baumannii]		100.00	1590	0	0	1	1590	100	1	1590	0.0	3306
ACJ56263.1		ATP88006.1 Putative deoxyribonuclease RhsC [Acinetobacter baumannii]		100.00	1590	0	0	1	1590	100	1	1590	0.0	3306
ACJ56263.1		ASF76507.1 Putative deoxyribonuclease RhsC [Acinetobacter baumannii]		100.00	1590	0	0	1	1590	100	1	1590	0.0	3306
ACJ56263.1		ALJ88606.1 hypothetical protein AN415_02704 [Acinetobacter baumannii]		100.00	1590	0	0	1	1590	100	1	1590	0.0	3306
ACJ56263.1		AJF81072.1 Protein rhsD precursor [Acinetobacter baumannii]		100.00	1590	0	0	1	1590	100	1	1590	0.0	3306
ACJ56263.1		ACJ56263.1 Protein rhsD precursor [Acinetobacter baumannii AB307-0294]		100.00	1590	0	0	1	1590	100	1	1590	0.0	3306
ACJ56263.1		ACJ40183.1 type IV secretion protein Rhs [Acinetobacter baumannii AB0057]		100.00	1590	0	0	1	1590	100	1	1590	0.0	3306
ACJ56263.1		AKA32533.1 YD repeat protein [Acinetobacter baumannii]		99.94	1590	1	0	1	1590	100	1	1590	0.0	3305
ACJ56263.1		AVF07887.1 type IV secretion protein Rhs [Acinetobacter baumannii]		99.94	1590	1	0	1	1590	100	1	1590	0.0	3304
ACJ56263.1		KMV01706.1 RHS repeat-associated core domain protein [Acinetobacter baumannii]		95.97	1590	64	0	1	1590	100	1	1590	0.0	3164
ACJ56263.1		BAP67459.1 hypothetical protein IOMTU433_2683 [Acinetobacter baumannii]		95.97	1590	64	0	1	1590	100	1	1590	0.0	3164
ACJ56263.1		AJB67544.1 type IV secretion protein Rhs [Acinetobacter baumannii]		95.03	1590	79	0	1	1590	100	1	1590	0.0	3135
ACJ56263.1		CAP00739.1 putative Rhs family protein [Acinetobacter baumannii SDF]		94.84	1590	82	0	1	1590	100	2	1591	0.0	3128
ACJ56263.1		AVO91662.1 type IV secretion protein Rhs [Acinetobacter baumannii]		94.03	1590	95	0	1	1590	100	1	1590	0.0	3098
ACJ56263.1		AVE54656.1 type IV secretion protein Rhs [Acinetobacter baumannii]		94.03	1590	95	0	1	1590	100	1	1590	0.0	3098
ACJ56263.1		ATD18514.1 type IV secretion protein Rhs [Acinetobacter baumannii]		94.03	1590	95	0	1	1590	100	1	1590	0.0	3098
ACJ56263.1		APJ20344.1 type IV secretion protein Rhs [Acinetobacter baumannii]		94.03	1590	95	0	1	1590	100	1	1590	0.0	3098
ACJ56263.1		AIS05825.1 type IV secretion protein Rhs [Acinetobacter baumannii]		94.03	1590	95	0	1	1590	100	1	1590	0.0	3098
ACJ56263.1		AIL78115.1 type IV secretion protein Rhs [Acinetobacter baumannii]		94.03	1590	95	0	1	1590	100	1	1590	0.0	3098
ACJ56263.1		AOX96243.1 Rhs family protein [Acinetobacter baumannii]		93.89	1358	83	0	1	1358	85	1	1358	0.0	2662
ACJ56263.1		AOX92387.1 Rhs family protein [Acinetobacter baumannii]		93.89	1358	83	0	1	1358	85	1	1358	0.0	2662
ACJ56263.1		AOX88550.1 Rhs family protein [Acinetobacter baumannii]		93.89	1358	83	0	1	1358	85	1	1358	0.0	2662
ACJ56263.1		AOX82053.1 Rhs family protein [Acinetobacter baumannii]		93.89	1358	83	0	1	1358	85	1	1358	0.0	2662
ACJ56263.1		AOX72975.1 Putative deoxyribonuclease RhsC [Acinetobacter baumannii]		93.89	1358	83	0	1	1358	85	1	1358	0.0	2662
ACJ56263.1		AOX84676.1 Rhs family protein [Acinetobacter baumannii]		93.69	904	57	0	455	1358	57	1	904	0.0	1779
ACJ56263.1		BAN88308.1 RHS repeat-associated core domain protein [Acinetobacter baumannii NCGM 237]		90.61	1459	129	1	1	1459	92	2	1452	0.0	2744
ACJ56263.1		AWW81989.1 type IV secretion protein Rhs [Acinetobacter baumannii]		90.61	1459	129	1	1	1459	92	1	1451	0.0	2744
ACJ56263.1		AWS02988.1 type IV secretion protein Rhs [Acinetobacter baumannii]		90.61	1459	129	1	1	1459	92	1	1451	0.0	2744
ACJ56263.1		AWO16033.1 type IV secretion protein Rhs [Acinetobacter baumannii]		90.61	1459	129	1	1	1459	92	1	1451	0.0	2744
ACJ56263.1		AVN07103.1 RHS repeat-associated core domain protein [Acinetobacter baumannii]		90.61	1459	129	1	1	1459	92	1	1451	0.0	2744
ACJ56263.1		AVO88685.1 type IV secretion protein Rhs [Acinetobacter baumannii]		90.61	1459	129	1	1	1459	92	1	1451	0.0	2744
ACJ56263.1		AVE90961.1 type IV secretion protein Rhs [Acinetobacter baumannii]		90.61	1459	129	1	1	1459	92	1	1451	0.0	2744
ACJ56263.1		AVE45481.1 type IV secretion protein Rhs [Acinetobacter baumannii]		90.61	1459	129	1	1	1459	92	1	1451	0.0	2744
ACJ56263.1		AUG13979.1 type IV secretion protein Rhs [Acinetobacter baumannii]		90.61	1459	129	1	1	1459	92	1	1451	0.0	2744
ACJ56263.1		ATU57028.1 type IV secretion protein Rhs [Acinetobacter baumannii]		90.61	1459	129	1	1	1459	92	1	1451	0.0	2744
ACJ56263.1		ATU53427.1 type IV secretion protein Rhs [Acinetobacter baumannii]		90.61	1459	129	1	1	1459	92	1	1451	0.0	2744
ACJ56263.1		ATU49693.1 type IV secretion protein Rhs [Acinetobacter baumannii]		90.61	1459	129	1	1	1459	92	1	1451	0.0	2744
ACJ56263.1		ARF92211.1 type IV secretion protein Rhs [Acinetobacter baumannii]		90.61	1459	129	1	1	1459	92	1	1451	0.0	2744
ACJ56263.1		APM49564.1 type IV secretion protein Rhs [Acinetobacter baumannii]		90.61	1459	129	1	1	1459	92	1	1451	0.0	2744
ACJ56263.1		APF44378.1 type IV secretion protein Rhs [Acinetobacter baumannii]		90.61	1459	129	1	1	1459	92	1	1451	0.0	2744
ACJ56263.1		SBS22710.1 Rhs family protein,Cell wall-associated polypeptide CWBP200,Uncharacterized conserved protein,YD repeat (two copies),RHS Repeat [Acinetobacter baumannii]		90.61	1459	129	1	1	1459	92	1	1451	0.0	2744
ACJ56263.1		AML75039.1 type IV secretion protein Rhs [Acinetobacter baumannii]		90.61	1459	129	1	1	1459	92	1	1451	0.0	2744
ACJ56263.1		AMC14824.1 type IV secretion protein Rhs [Acinetobacter baumannii]		90.61	1459	129	1	1	1459	92	1	1451	0.0	2744
ACJ56263.1		ALY00197.1 RHS repeat-associated core domain protein [Acinetobacter baumannii]		90.61	1459	129	1	1	1459	92	1	1451	0.0	2744
ACJ56263.1		AKJ46478.1 type IV secretion protein Rhs [Acinetobacter baumannii]		90.61	1459	129	1	1	1459	92	1	1451	0.0	2744
ACJ56263.1		AGQ13669.1 Rhs family protein [Acinetobacter baumannii BJAB07104]		90.61	1459	129	1	1	1459	92	1	1451	0.0	2744
ACJ56263.1		AFU37587.1 Rhs family protein [Acinetobacter baumannii TYTH-1]		90.61	1459	129	1	1	1459	92	1	1451	0.0	2744
ACJ56263.1		AFI96201.1 RHS repeat-associated core domain protein [Acinetobacter baumannii MDR-TJ]		90.61	1459	129	1	1	1459	92	1	1451	0.0	2744
ACJ56263.1		AEP05726.1 Rhs family protein [Acinetobacter baumannii MDR-ZJ06]		90.61	1459	129	1	1	1459	92	1	1451	0.0	2744
ACJ56263.1		ADX91713.1 Rhs family protein [Acinetobacter baumannii TCDC-AB0715]		90.61	1459	129	1	1	1459	92	1	1451	0.0	2744
ACJ56263.1		ACC56430.1 Rhs family protein [Acinetobacter baumannii ACICU]		90.61	1459	129	1	1	1459	92	1	1451	0.0	2744
ACJ56263.1		AGQ09792.1 Rhs family protein [Acinetobacter baumannii BJAB0868]		90.54	1459	130	1	1	1459	92	1	1451	0.0	2741
ACJ56263.1		ARG26400.1 type IV secretion protein Rhs [Acinetobacter baumannii]		90.54	1459	130	1	1	1459	92	1	1451	0.0	2741
ACJ56263.1		ARG24687.1 type IV secretion protein Rhs [Acinetobacter baumannii]		90.54	1459	130	1	1	1459	92	1	1451	0.0	2741
ACJ56263.1		ARG21230.1 type IV secretion protein Rhs [Acinetobacter baumannii]		90.54	1459	130	1	1	1459	92	1	1451	0.0	2741
ACJ56263.1		AVG27357.1 type IV secretion protein Rhs [Acinetobacter baumannii]		90.54	1459	130	1	1	1459	92	1	1451	0.0	2741
ACJ56263.1		APQ93616.1 type IV secretion protein Rhs [Acinetobacter baumannii]		90.54	1459	130	1	1	1459	92	1	1451	0.0	2741
ACJ56263.1		APQ89839.1 type IV secretion protein Rhs [Acinetobacter baumannii]		90.54	1459	130	1	1	1459	92	1	1451	0.0	2741
ACJ56263.1		APQ85982.1 type IV secretion protein Rhs [Acinetobacter baumannii]		90.54	1459	130	1	1	1459	92	1	1451	0.0	2741
ACJ56263.1		APJ23952.1 type IV secretion protein Rhs [Acinetobacter baumannii]		90.54	1459	130	1	1	1459	92	1	1451	0.0	2741
ACJ56263.1		ANB89396.1 type IV secretion protein Rhs [Acinetobacter baumannii]		90.54	1459	130	1	1	1459	92	1	1451	0.0	2741
ACJ56263.1		AUM27024.1 type IV secretion protein Rhs [Acinetobacter pittii]		87.97	1455	166	1	1	1455	92	1	1446	0.0	2663
ACJ56263.1		ARG17738.1 type IV secretion protein Rhs [Acinetobacter nosocomialis]		83.37	1612	236	7	1	1586	99	1	1606	0.0	2732
ACJ56263.1		AWL19953.1 type IV secretion protein Rhs [Acinetobacter nosocomialis]		83.31	1612	237	7	1	1586	99	1	1606	0.0	2731
ACJ56263.1		ATZ62854.1 type IV secretion protein Rhs [Acinetobacter bereziniae]		70.05	1409	392	9	14	1396	87	25	1429	0.0	2048
ACJ56263.1		BAP36559.1 hypothetical protein AS4_16190 [Acinetobacter guillouiae]		69.62	1409	409	7	2	1395	88	11	1415	0.0	2082
ACJ56263.1		ENU58069.1 hypothetical protein F981_02357 [Acinetobacter guillouiae CIP 63.46]		69.41	1412	410	7	2	1395	88	11	1418	0.0	2077
ACJ56263.1		OBY75706.1 type IV secretion protein Rhs [Acinetobacter gyllenbergii]		68.09	1620	476	9	1	1586	99	1	1613	0.0	2277
ACJ56263.1		ENV16797.1 hypothetical protein F964_02545 [Acinetobacter guillouiae NIPH 991]		64.65	1601	524	12	5	1571	99	14	1606	0.0	2149
ACJ56263.1		AOA59586.1 type IV secretion protein Rhs [Acinetobacter larvae]		61.32	1391	526	8	10	1394	87	6	1390	0.0	1755
ACJ56263.1		EPF74236.1 hypothetical protein F945_01603 [Acinetobacter rudis CIP 110305]		58.96	1535	592	12	1	1526	96	1	1506	0.0	1838
ACJ56263.1		EPF71085.1 hypothetical protein F945_02848 [Acinetobacter rudis CIP 110305]		58.58	1603	618	17	1	1580	99	1	1580	0.0	1902
ACJ56263.1		ADY81214.1 hypothetical protein BDGL_000628 [Acinetobacter pittii PHEA-2]		42.86	420	194	9	1011	1395	48	1	409	2e-99	330
ACJ56263.1		ENV35528.1 hypothetical protein F960_00210 [Acinetobacter gerneri DSM 14967 = CIP 107464]		40.48	504	253	8	927	1396	48	34	524	1e-106	353
ACJ56263.1		AQV16110.1 type IV secretion protein Rhs [Acinetobacter pittii]		35.09	1459	802	35	61	1398	84	50	1484	0.0	759
ACJ56263.1		OBY76095.1 type IV secretion protein Rhs [Acinetobacter gyllenbergii]		34.60	1532	830	38	5	1398	88	10	1507	0.0	819
ACJ56263.1		PKF31562.1 type IV secretion protein Rhs [Acinetobacter proteolyticus]		34.53	1532	831	38	5	1398	88	10	1507	0.0	814
ACJ56263.1		ESK43108.1 hypothetical protein F987_01989 [Acinetobacter gyllenbergii NIPH 230]		34.48	1546	838	39	5	1412	89	10	1518	0.0	813
ACJ56263.1		PJF02600.1 type IV secretion protein Rhs [Acinetobacter seifertii]		34.29	1534	829	39	10	1395	87	10	1512	0.0	810
ACJ56263.1		AWL19753.1 type IV secretion protein Rhs [Acinetobacter nosocomialis]		34.21	1362	753	31	152	1396	78	161	1496	0.0	718
ACJ56263.1		ASF76790.1 Putative deoxyribonuclease RhsC [Acinetobacter baumannii]		34.18	1372	758	32	152	1405	79	162	1506	0.0	708
ACJ56263.1		SQI56230.1 RHS family protein [Acinetobacter baumannii]		34.18	1372	758	32	152	1405	79	162	1506	0.0	708
ACJ56263.1		AVN25458.1 type IV secretion protein Rhs [Acinetobacter baumannii]		34.18	1372	758	32	152	1405	79	162	1506	0.0	708
ACJ56263.1		AVN13895.1 type IV secretion protein Rhs [Acinetobacter baumannii]		34.18	1372	758	32	152	1405	79	162	1506	0.0	708
ACJ56263.1		ATY44678.1 Putative deoxyribonuclease RhsC [Acinetobacter baumannii]		34.18	1372	758	32	152	1405	79	162	1506	0.0	708
ACJ56263.1		ATP87721.1 Putative deoxyribonuclease RhsC [Acinetobacter baumannii]		34.18	1372	758	32	152	1405	79	162	1506	0.0	708
ACJ56263.1		ARG31257.1 type IV secretion protein Rhs [Acinetobacter baumannii]		34.18	1372	758	32	152	1405	79	162	1506	0.0	708
ACJ56263.1		ALJ88430.1 Rhs family protein [Acinetobacter baumannii]		34.18	1372	758	32	152	1405	79	162	1506	0.0	708
ACJ56263.1		AKA32340.1 RHS family protein [Acinetobacter baumannii]		34.18	1372	758	32	152	1405	79	162	1506	0.0	708
ACJ56263.1		AJF81267.1 core protein [Acinetobacter baumannii]		34.18	1372	758	32	152	1405	79	162	1506	0.0	708
ACJ56263.1		ACJ56464.1 core protein [Acinetobacter baumannii AB307-0294]		34.18	1372	758	32	152	1405	79	162	1506	0.0	708
ACJ56263.1		ACJ40461.1 type IV secretion protein Rhs [Acinetobacter baumannii AB0057]		34.18	1372	758	32	152	1405	79	162	1506	0.0	708
ACJ56263.1		ENV32716.1 hypothetical protein F960_03223 [Acinetobacter gerneri DSM 14967 = CIP 107464]		34.16	1528	836	39	8	1396	91	5	1501	0.0	736
ACJ56263.1		AVF44788.1 type IV secretion protein Rhs [Acinetobacter nosocomialis]		34.14	1362	754	31	152	1396	78	161	1496	0.0	715
ACJ56263.1		ARG17515.1 type IV secretion protein Rhs [Acinetobacter nosocomialis]		34.14	1362	754	31	152	1396	78	161	1496	0.0	715
ACJ56263.1		AJB67372.1 type IV secretion protein Rhs [Acinetobacter baumannii]		34.04	1516	838	36	14	1403	87	9	1488	0.0	757
ACJ56263.1		PJG65407.1 type IV secretion protein Rhs [Acinetobacter seifertii]		34.04	1363	754	32	152	1396	78	161	1496	0.0	688
ACJ56263.1		AWW81842.1 type IV secretion protein Rhs [Acinetobacter baumannii]		33.97	1510	831	37	14	1395	87	9	1480	0.0	748
ACJ56263.1		AWW78052.1 type IV secretion protein Rhs [Acinetobacter baumannii]		33.97	1510	831	37	14	1395	87	9	1480	0.0	748
ACJ56263.1		AWS03151.1 type IV secretion protein Rhs [Acinetobacter baumannii]		33.97	1510	831	37	14	1395	87	9	1480	0.0	748
ACJ56263.1		AVN05728.1 RHS repeat-associated core domain protein [Acinetobacter baumannii]		33.97	1510	831	37	14	1395	87	9	1480	0.0	748
ACJ56263.1		AVG27213.1 type IV secretion protein Rhs [Acinetobacter baumannii]		33.97	1510	831	37	14	1395	87	9	1480	0.0	748
ACJ56263.1		AVE90804.1 type IV secretion protein Rhs [Acinetobacter baumannii]		33.97	1510	831	37	14	1395	87	9	1480	0.0	748
ACJ56263.1		AVE45312.1 type IV secretion protein Rhs [Acinetobacter baumannii]		33.97	1510	831	37	14	1395	87	9	1480	0.0	748
ACJ56263.1		AUG14134.1 type IV secretion protein Rhs [Acinetobacter baumannii]		33.97	1510	831	37	14	1395	87	9	1480	0.0	748
ACJ56263.1		ATU56883.1 type IV secretion protein Rhs [Acinetobacter baumannii]		33.97	1510	831	37	14	1395	87	9	1480	0.0	748
ACJ56263.1		ATU53268.1 type IV secretion protein Rhs [Acinetobacter baumannii]		33.97	1510	831	37	14	1395	87	9	1480	0.0	748
ACJ56263.1		ATU49547.1 type IV secretion protein Rhs [Acinetobacter baumannii]		33.97	1510	831	37	14	1395	87	9	1480	0.0	748
ACJ56263.1		ATU22625.1 Rhs family protein [Acinetobacter baumannii]		33.97	1510	831	37	14	1395	87	9	1480	0.0	748
ACJ56263.1		ATR88411.1 type IV secretion protein Rhs [Acinetobacter baumannii]		33.97	1510	831	37	14	1395	87	9	1480	0.0	748
ACJ56263.1		ARG26529.1 type IV secretion protein Rhs [Acinetobacter baumannii]		33.97	1510	831	37	14	1395	87	9	1480	0.0	748
ACJ56263.1		ARG24827.1 type IV secretion protein Rhs [Acinetobacter baumannii]		33.97	1510	831	37	14	1395	87	9	1480	0.0	748
ACJ56263.1		ARG21091.1 type IV secretion protein Rhs [Acinetobacter baumannii]		33.97	1510	831	37	14	1395	87	9	1480	0.0	748
ACJ56263.1		ARG13139.1 type IV secretion protein Rhs [Acinetobacter baumannii]		33.97	1510	831	37	14	1395	87	9	1480	0.0	748
ACJ56263.1		ARG09515.1 type IV secretion protein Rhs [Acinetobacter baumannii]		33.97	1510	831	37	14	1395	87	9	1480	0.0	748
ACJ56263.1		ARG02550.1 type IV secretion protein Rhs [Acinetobacter baumannii]		33.97	1510	831	37	14	1395	87	9	1480	0.0	748
ACJ56263.1		ARF95491.1 type IV secretion protein Rhs [Acinetobacter baumannii]		33.97	1510	831	37	14	1395	87	9	1480	0.0	748
ACJ56263.1		ARF92071.1 type IV secretion protein Rhs [Acinetobacter baumannii]		33.97	1510	831	37	14	1395	87	9	1480	0.0	748
ACJ56263.1		AQU55727.1 type IV secretion protein Rhs [Acinetobacter baumannii]		33.97	1510	831	37	14	1395	87	9	1480	0.0	748
ACJ56263.1		APQ93473.1 type IV secretion protein Rhs [Acinetobacter baumannii]		33.97	1510	831	37	14	1395	87	9	1480	0.0	748
ACJ56263.1		APQ89701.1 type IV secretion protein Rhs [Acinetobacter baumannii]		33.97	1510	831	37	14	1395	87	9	1480	0.0	748
ACJ56263.1		APQ85839.1 type IV secretion protein Rhs [Acinetobacter baumannii]		33.97	1510	831	37	14	1395	87	9	1480	0.0	748
ACJ56263.1		APM49440.1 type IV secretion protein Rhs [Acinetobacter baumannii]		33.97	1510	831	37	14	1395	87	9	1480	0.0	748
ACJ56263.1		APJ23810.1 type IV secretion protein Rhs [Acinetobacter baumannii]		33.97	1510	831	37	14	1395	87	9	1480	0.0	748
ACJ56263.1		APF44252.1 type IV secretion protein Rhs [Acinetobacter baumannii]		33.97	1510	831	37	14	1395	87	9	1480	0.0	748
ACJ56263.1		AOX96369.1 RHS repeat-associated core domain protein [Acinetobacter baumannii]		33.97	1510	831	37	14	1395	87	9	1480	0.0	748
ACJ56263.1		AOX92508.1 RHS repeat-associated core domain protein [Acinetobacter baumannii]		33.97	1510	831	37	14	1395	87	9	1480	0.0	748
ACJ56263.1		AOX88672.1 RHS repeat-associated core domain protein [Acinetobacter baumannii]		33.97	1510	831	37	14	1395	87	9	1480	0.0	748
ACJ56263.1		AOX84801.1 RHS repeat-associated core domain protein [Acinetobacter baumannii]		33.97	1510	831	37	14	1395	87	9	1480	0.0	748
ACJ56263.1		AOX81932.1 RHS repeat-associated core domain protein [Acinetobacter baumannii]		33.97	1510	831	37	14	1395	87	9	1480	0.0	748
ACJ56263.1		AOX77788.1 RHS repeat-associated core domain protein [Acinetobacter baumannii]		33.97	1510	831	37	14	1395	87	9	1480	0.0	748
ACJ56263.1		AOX73098.1 Putative deoxyribonuclease RhsC [Acinetobacter baumannii]		33.97	1510	831	37	14	1395	87	9	1480	0.0	748
ACJ56263.1		AOX69303.1 RHS repeat-associated core domain protein [Acinetobacter baumannii]		33.97	1510	831	37	14	1395	87	9	1480	0.0	748
ACJ56263.1		AOP62639.1 RHS repeat-associated core domain protein [Acinetobacter baumannii DU202]		33.97	1510	831	37	14	1395	87	9	1480	0.0	748
ACJ56263.1		SBS22505.1 Rhs family protein,Cell wall-associated polypeptide CWBP200,Uncharacterized conserved protein,YD repeat (two copies),RHS Repeat [Acinetobacter baumannii]		33.97	1510	831	37	14	1395	87	9	1480	0.0	748
ACJ56263.1		ANB89252.1 type IV secretion protein Rhs [Acinetobacter baumannii]		33.97	1510	831	37	14	1395	87	9	1480	0.0	748
ACJ56263.1		AML74885.1 type IV secretion protein Rhs [Acinetobacter baumannii]		33.97	1510	831	37	14	1395	87	9	1480	0.0	748
ACJ56263.1		AML71328.1 type IV secretion protein Rhs [Acinetobacter baumannii]		33.97	1510	831	37	14	1395	87	9	1480	0.0	748
ACJ56263.1		AML66639.1 type IV secretion protein Rhs [Acinetobacter baumannii]		33.97	1510	831	37	14	1395	87	9	1480	0.0	748
ACJ56263.1		AML64159.1 type IV secretion protein Rhs [Acinetobacter baumannii]		33.97	1510	831	37	14	1395	87	9	1480	0.0	748
ACJ56263.1		AMC14962.1 type IV secretion protein Rhs [Acinetobacter baumannii]		33.97	1510	831	37	14	1395	87	9	1480	0.0	748
ACJ56263.1		ALY00045.1 Type IV secretion protein Rhs [Acinetobacter baumannii]		33.97	1510	831	37	14	1395	87	9	1480	0.0	748
ACJ56263.1		AKJ46334.1 type IV secretion protein Rhs [Acinetobacter baumannii]		33.97	1510	831	37	14	1395	87	9	1480	0.0	748
ACJ56263.1		AIA52786.1 type IV secretion protein Rhs [Acinetobacter baumannii]		33.97	1510	831	37	14	1395	87	9	1480	0.0	748
ACJ56263.1		AHX64207.1 type IV secretion protein Rhs [Acinetobacter baumannii AC30]		33.97	1510	831	37	14	1395	87	9	1480	0.0	748
ACJ56263.1		AHJ92779.1 type IV secretion protein Rhs [Acinetobacter baumannii PKAB07]		33.97	1510	831	37	14	1395	87	9	1480	0.0	748
ACJ56263.1		BAN88192.1 RHS repeat-associated core domain protein [Acinetobacter baumannii NCGM 237]		33.97	1510	831	37	14	1395	87	9	1480	0.0	748
ACJ56263.1		AGQ09926.1 Rhs family protein [Acinetobacter baumannii BJAB0868]		33.97	1510	831	37	14	1395	87	9	1480	0.0	748
ACJ56263.1		AGQ13797.1 Rhs family protein [Acinetobacter baumannii BJAB07104]		33.97	1510	831	37	14	1395	87	9	1480	0.0	748
ACJ56263.1		AFU37726.1 Rhs family protein [Acinetobacter baumannii TYTH-1]		33.97	1510	831	37	14	1395	87	9	1480	0.0	748
ACJ56263.1		AFI96044.1 RHS repeat-associated core domain protein [Acinetobacter baumannii MDR-TJ]		33.97	1510	831	37	14	1395	87	9	1480	0.0	748
ACJ56263.1		AEP05879.1 Rhs family protein [Acinetobacter baumannii MDR-ZJ06]		33.97	1510	831	37	14	1395	87	9	1480	0.0	748
ACJ56263.1		ADX91868.1 Rhs family protein [Acinetobacter baumannii TCDC-AB0715]		33.97	1510	831	37	14	1395	87	9	1480	0.0	748
ACJ56263.1		ADX03345.1 Rhs family protein [Acinetobacter baumannii 1656-2]		33.97	1510	831	37	14	1395	87	9	1480	0.0	748
ACJ56263.1		ACC56574.1 Rhs family protein [Acinetobacter baumannii ACICU]		33.97	1510	831	37	14	1395	87	9	1480	0.0	748
ACJ56263.1		SNQ29618.1 RHS repeat-associated core domain-containing protein [Acinetobacter apis]		33.97	1472	829	34	45	1397	85	34	1481	0.0	758
ACJ56263.1		AVO91841.1 type IV secretion protein Rhs [Acinetobacter baumannii]		33.87	1565	843	39	10	1413	88	10	1543	0.0	816
ACJ56263.1		AVE54836.1 type IV secretion protein Rhs [Acinetobacter baumannii]		33.87	1565	843	39	10	1413	88	10	1543	0.0	816
ACJ56263.1		ATD20691.1 type IV secretion protein Rhs [Acinetobacter baumannii]		33.87	1565	843	39	10	1413	88	10	1543	0.0	816
ACJ56263.1		APJ20107.1 type IV secretion protein Rhs [Acinetobacter baumannii]		33.87	1565	843	39	10	1413	88	10	1543	0.0	816
ACJ56263.1		AUM26779.1 type IV secretion protein Rhs [Acinetobacter pittii]		33.87	1358	761	32	152	1395	78	161	1495	0.0	701
ACJ56263.1		KMV01891.1 RHS repeat-associated core domain protein [Acinetobacter baumannii]		33.67	1565	846	40	10	1413	88	10	1543	0.0	807
ACJ56263.1		BAP67215.1 Rhs family protein [Acinetobacter baumannii]		33.67	1565	846	40	10	1413	88	10	1543	0.0	807
ACJ56263.1		BAP38339.1 putative Rhs family protein [Acinetobacter guillouiae]		32.72	1577	871	41	14	1438	90	3	1541	0.0	731
ACJ56263.1		ENU60613.1 hypothetical protein F981_00526 [Acinetobacter guillouiae CIP 63.46]		32.66	1577	872	41	14	1438	90	3	1541	0.0	729
ACJ56263.1		EOR08053.1 hypothetical protein I593_01407 [Acinetobacter tandoii DSM 14970 = CIP 107469]		32.35	1456	852	32	48	1396	85	44	1473	0.0	728
ACJ56263.1		CAP01586.1 conserved hypothetical protein; putative Rhs family protein [Acinetobacter baumannii SDF]		31.86	1133	649	25	152	1177	65	162	1278	4e-156	510
ACJ56263.1		ENV32716.1 hypothetical protein F960_03223 [Acinetobacter gerneri DSM 14967 = CIP 107464]		31.48	54	29	3	1516	1567	91	230	277	1.2	30.8
ACJ56263.1		ENV14962.1 hypothetical protein F964_04390, partial [Acinetobacter guillouiae NIPH 991]		30.90	1272	724	33	14	1156	72	3	1248	2e-159	519
ACJ56464.1_core_protein_Rhs2_nuclease_[Acinetobacter	Rhs2_nuclease_[Acinetobacter baumannii AB307-0294]	SQI56230.1 RHS family protein [Acinetobacter baumannii]	AHH domain (1506-1605)	100.00	1623	0	0	1	1623	100	1	1623	0.0	3367
ACJ56464.1_core_protein_Rhs2_nuclease_[Acinetobacter		AVN25458.1 type IV secretion protein Rhs [Acinetobacter baumannii]		100.00	1623	0	0	1	1623	100	1	1623	0.0	3367
ACJ56464.1_core_protein_Rhs2_nuclease_[Acinetobacter		AVN13895.1 type IV secretion protein Rhs [Acinetobacter baumannii]		100.00	1623	0	0	1	1623	100	1	1623	0.0	3367
ACJ56464.1_core_protein_Rhs2_nuclease_[Acinetobacter		ATY44678.1 Putative deoxyribonuclease RhsC [Acinetobacter baumannii]		100.00	1623	0	0	1	1623	100	1	1623	0.0	3367
ACJ56464.1_core_protein_Rhs2_nuclease_[Acinetobacter		ATP87721.1 Putative deoxyribonuclease RhsC [Acinetobacter baumannii]		100.00	1623	0	0	1	1623	100	1	1623	0.0	3367
ACJ56464.1_core_protein_Rhs2_nuclease_[Acinetobacter		ARG31257.1 type IV secretion protein Rhs [Acinetobacter baumannii]		100.00	1623	0	0	1	1623	100	1	1623	0.0	3367
ACJ56464.1_core_protein_Rhs2_nuclease_[Acinetobacter		ALJ88430.1 Rhs family protein [Acinetobacter baumannii]		100.00	1623	0	0	1	1623	100	1	1623	0.0	3367
ACJ56464.1_core_protein_Rhs2_nuclease_[Acinetobacter		AKA32340.1 RHS family protein [Acinetobacter baumannii]		100.00	1623	0	0	1	1623	100	1	1623	0.0	3367
ACJ56464.1_core_protein_Rhs2_nuclease_[Acinetobacter		AJF81267.1 core protein [Acinetobacter baumannii]		100.00	1623	0	0	1	1623	100	1	1623	0.0	3367
ACJ56464.1_core_protein_Rhs2_nuclease_[Acinetobacter		ACJ56464.1 core protein [Acinetobacter baumannii AB307-0294]		100.00	1623	0	0	1	1623	100	1	1623	0.0	3367
ACJ56464.1_core_protein_Rhs2_nuclease_[Acinetobacter		ACJ40461.1 type IV secretion protein Rhs [Acinetobacter baumannii AB0057]		100.00	1623	0	0	1	1623	100	1	1623	0.0	3367
ACJ56464.1_core_protein_Rhs2_nuclease_[Acinetobacter		ASF76790.1 Putative deoxyribonuclease RhsC [Acinetobacter baumannii]		99.94	1623	1	0	1	1623	100	1	1623	0.0	3365
ACJ56464.1_core_protein_Rhs2_nuclease_[Acinetobacter		CAP01586.1 conserved hypothetical protein; putative Rhs family protein [Acinetobacter baumannii SDF]		98.51	1278	19	0	1	1278	80	1	1278	0.0	2578
ACJ56464.1_core_protein_Rhs2_nuclease_[Acinetobacter		PJG65407.1 type IV secretion protein Rhs [Acinetobacter seifertii]		96.33	1497	54	1	1	1497	92	1	1496	0.0	2974
ACJ56464.1_core_protein_Rhs2_nuclease_[Acinetobacter		AUM26779.1 type IV secretion protein Rhs [Acinetobacter pittii]		92.57	1508	110	2	1	1507	93	1	1507	0.0	2883
ACJ56464.1_core_protein_Rhs2_nuclease_[Acinetobacter		AVF44788.1 type IV secretion protein Rhs [Acinetobacter nosocomialis]		89.82	1592	144	5	1	1582	97	1	1584	0.0	2932
ACJ56464.1_core_protein_Rhs2_nuclease_[Acinetobacter		ARG17515.1 type IV secretion protein Rhs [Acinetobacter nosocomialis]		89.82	1592	144	5	1	1582	97	1	1584	0.0	2932
ACJ56464.1_core_protein_Rhs2_nuclease_[Acinetobacter		AWL19753.1 type IV secretion protein Rhs [Acinetobacter nosocomialis]		89.76	1592	145	5	1	1582	97	1	1584	0.0	2929
ACJ56464.1_core_protein_Rhs2_nuclease_[Acinetobacter		ADY81214.1 hypothetical protein BDGL_000628 [Acinetobacter pittii PHEA-2]		74.64	418	104	1	1086	1503	50	1	416	0.0	672
ACJ56464.1_core_protein_Rhs2_nuclease_[Acinetobacter		AMX18957.1 Putative deoxyribonuclease RhsC [Acinetobacter pittii]		71.07	394	106	2	1130	1517	42	1	392	0.0	594
ACJ56464.1_core_protein_Rhs2_nuclease_[Acinetobacter		ENV15661.1 hypothetical protein F964_04387 [Acinetobacter guillouiae NIPH 991]		69.21	471	135	3	1147	1612	49	5	470	0.0	662
ACJ56464.1_core_protein_Rhs2_nuclease_[Acinetobacter		BAP38339.1 putative Rhs family protein [Acinetobacter guillouiae]		67.40	1506	449	10	6	1496	92	8	1486	0.0	2099
ACJ56464.1_core_protein_Rhs2_nuclease_[Acinetobacter		ENU60613.1 hypothetical protein F981_00526 [Acinetobacter guillouiae CIP 63.46]		67.33	1506	450	10	6	1496	92	8	1486	0.0	2092
ACJ56464.1_core_protein_Rhs2_nuclease_[Acinetobacter		ENV14962.1 hypothetical protein F964_04390, partial [Acinetobacter guillouiae NIPH 991]		63.29	1275	425	11	6	1264	80	8	1255	0.0	1635
ACJ56464.1_core_protein_Rhs2_nuclease_[Acinetobacter		AJB67372.1 type IV secretion protein Rhs [Acinetobacter baumannii]		62.51	1499	529	7	6	1496	92	7	1480	0.0	1922
ACJ56464.1_core_protein_Rhs2_nuclease_[Acinetobacter		AQV16110.1 type IV secretion protein Rhs [Acinetobacter pittii]		62.11	1507	537	8	3	1500	92	4	1485	0.0	1908
ACJ56464.1_core_protein_Rhs2_nuclease_[Acinetobacter		AWW81842.1 type IV secretion protein Rhs [Acinetobacter baumannii]		60.69	1590	586	11	6	1582	97	7	1570	0.0	1939
ACJ56464.1_core_protein_Rhs2_nuclease_[Acinetobacter		AWW78052.1 type IV secretion protein Rhs [Acinetobacter baumannii]		60.69	1590	586	11	6	1582	97	7	1570	0.0	1939
ACJ56464.1_core_protein_Rhs2_nuclease_[Acinetobacter		AWS03151.1 type IV secretion protein Rhs [Acinetobacter baumannii]		60.69	1590	586	11	6	1582	97	7	1570	0.0	1939
ACJ56464.1_core_protein_Rhs2_nuclease_[Acinetobacter		AVN05728.1 RHS repeat-associated core domain protein [Acinetobacter baumannii]		60.69	1590	586	11	6	1582	97	7	1570	0.0	1939
ACJ56464.1_core_protein_Rhs2_nuclease_[Acinetobacter		AVG27213.1 type IV secretion protein Rhs [Acinetobacter baumannii]		60.69	1590	586	11	6	1582	97	7	1570	0.0	1939
ACJ56464.1_core_protein_Rhs2_nuclease_[Acinetobacter		AVE90804.1 type IV secretion protein Rhs [Acinetobacter baumannii]		60.69	1590	586	11	6	1582	97	7	1570	0.0	1939
ACJ56464.1_core_protein_Rhs2_nuclease_[Acinetobacter		AVE45312.1 type IV secretion protein Rhs [Acinetobacter baumannii]		60.69	1590	586	11	6	1582	97	7	1570	0.0	1939
ACJ56464.1_core_protein_Rhs2_nuclease_[Acinetobacter		AUG14134.1 type IV secretion protein Rhs [Acinetobacter baumannii]		60.69	1590	586	11	6	1582	97	7	1570	0.0	1939
ACJ56464.1_core_protein_Rhs2_nuclease_[Acinetobacter		ATU56883.1 type IV secretion protein Rhs [Acinetobacter baumannii]		60.69	1590	586	11	6	1582	97	7	1570	0.0	1939
ACJ56464.1_core_protein_Rhs2_nuclease_[Acinetobacter		ATU53268.1 type IV secretion protein Rhs [Acinetobacter baumannii]		60.69	1590	586	11	6	1582	97	7	1570	0.0	1939
ACJ56464.1_core_protein_Rhs2_nuclease_[Acinetobacter		ATU49547.1 type IV secretion protein Rhs [Acinetobacter baumannii]		60.69	1590	586	11	6	1582	97	7	1570	0.0	1939
ACJ56464.1_core_protein_Rhs2_nuclease_[Acinetobacter		ATU22625.1 Rhs family protein [Acinetobacter baumannii]		60.69	1590	586	11	6	1582	97	7	1570	0.0	1939
ACJ56464.1_core_protein_Rhs2_nuclease_[Acinetobacter		ATR88411.1 type IV secretion protein Rhs [Acinetobacter baumannii]		60.69	1590	586	11	6	1582	97	7	1570	0.0	1939
ACJ56464.1_core_protein_Rhs2_nuclease_[Acinetobacter		ARG26529.1 type IV secretion protein Rhs [Acinetobacter baumannii]		60.69	1590	586	11	6	1582	97	7	1570	0.0	1939
ACJ56464.1_core_protein_Rhs2_nuclease_[Acinetobacter		ARG24827.1 type IV secretion protein Rhs [Acinetobacter baumannii]		60.69	1590	586	11	6	1582	97	7	1570	0.0	1939
ACJ56464.1_core_protein_Rhs2_nuclease_[Acinetobacter		ARG21091.1 type IV secretion protein Rhs [Acinetobacter baumannii]		60.69	1590	586	11	6	1582	97	7	1570	0.0	1939
ACJ56464.1_core_protein_Rhs2_nuclease_[Acinetobacter		ARG13139.1 type IV secretion protein Rhs [Acinetobacter baumannii]		60.69	1590	586	11	6	1582	97	7	1570	0.0	1939
ACJ56464.1_core_protein_Rhs2_nuclease_[Acinetobacter		ARG09515.1 type IV secretion protein Rhs [Acinetobacter baumannii]		60.69	1590	586	11	6	1582	97	7	1570	0.0	1939
ACJ56464.1_core_protein_Rhs2_nuclease_[Acinetobacter		ARG02550.1 type IV secretion protein Rhs [Acinetobacter baumannii]		60.69	1590	586	11	6	1582	97	7	1570	0.0	1939
ACJ56464.1_core_protein_Rhs2_nuclease_[Acinetobacter		ARF95491.1 type IV secretion protein Rhs [Acinetobacter baumannii]		60.69	1590	586	11	6	1582	97	7	1570	0.0	1939
ACJ56464.1_core_protein_Rhs2_nuclease_[Acinetobacter		ARF92071.1 type IV secretion protein Rhs [Acinetobacter baumannii]		60.69	1590	586	11	6	1582	97	7	1570	0.0	1939
ACJ56464.1_core_protein_Rhs2_nuclease_[Acinetobacter		AQU55727.1 type IV secretion protein Rhs [Acinetobacter baumannii]		60.69	1590	586	11	6	1582	97	7	1570	0.0	1939
ACJ56464.1_core_protein_Rhs2_nuclease_[Acinetobacter		APQ93473.1 type IV secretion protein Rhs [Acinetobacter baumannii]		60.69	1590	586	11	6	1582	97	7	1570	0.0	1939
ACJ56464.1_core_protein_Rhs2_nuclease_[Acinetobacter		APQ89701.1 type IV secretion protein Rhs [Acinetobacter baumannii]		60.69	1590	586	11	6	1582	97	7	1570	0.0	1939
ACJ56464.1_core_protein_Rhs2_nuclease_[Acinetobacter		APQ85839.1 type IV secretion protein Rhs [Acinetobacter baumannii]		60.69	1590	586	11	6	1582	97	7	1570	0.0	1939
ACJ56464.1_core_protein_Rhs2_nuclease_[Acinetobacter		APM49440.1 type IV secretion protein Rhs [Acinetobacter baumannii]		60.69	1590	586	11	6	1582	97	7	1570	0.0	1939
ACJ56464.1_core_protein_Rhs2_nuclease_[Acinetobacter		APJ23810.1 type IV secretion protein Rhs [Acinetobacter baumannii]		60.69	1590	586	11	6	1582	97	7	1570	0.0	1939
ACJ56464.1_core_protein_Rhs2_nuclease_[Acinetobacter		APF44252.1 type IV secretion protein Rhs [Acinetobacter baumannii]		60.69	1590	586	11	6	1582	97	7	1570	0.0	1939
ACJ56464.1_core_protein_Rhs2_nuclease_[Acinetobacter		AOX96369.1 RHS repeat-associated core domain protein [Acinetobacter baumannii]		60.69	1590	586	11	6	1582	97	7	1570	0.0	1939
ACJ56464.1_core_protein_Rhs2_nuclease_[Acinetobacter		AOX92508.1 RHS repeat-associated core domain protein [Acinetobacter baumannii]		60.69	1590	586	11	6	1582	97	7	1570	0.0	1939
ACJ56464.1_core_protein_Rhs2_nuclease_[Acinetobacter		AOX88672.1 RHS repeat-associated core domain protein [Acinetobacter baumannii]		60.69	1590	586	11	6	1582	97	7	1570	0.0	1939
ACJ56464.1_core_protein_Rhs2_nuclease_[Acinetobacter		AOX84801.1 RHS repeat-associated core domain protein [Acinetobacter baumannii]		60.69	1590	586	11	6	1582	97	7	1570	0.0	1939
ACJ56464.1_core_protein_Rhs2_nuclease_[Acinetobacter		AOX81932.1 RHS repeat-associated core domain protein [Acinetobacter baumannii]		60.69	1590	586	11	6	1582	97	7	1570	0.0	1939
ACJ56464.1_core_protein_Rhs2_nuclease_[Acinetobacter		AOX77788.1 RHS repeat-associated core domain protein [Acinetobacter baumannii]		60.69	1590	586	11	6	1582	97	7	1570	0.0	1939
ACJ56464.1_core_protein_Rhs2_nuclease_[Acinetobacter		AOX73098.1 Putative deoxyribonuclease RhsC [Acinetobacter baumannii]		60.69	1590	586	11	6	1582	97	7	1570	0.0	1939
ACJ56464.1_core_protein_Rhs2_nuclease_[Acinetobacter		AOX69303.1 RHS repeat-associated core domain protein [Acinetobacter baumannii]		60.69	1590	586	11	6	1582	97	7	1570	0.0	1939
ACJ56464.1_core_protein_Rhs2_nuclease_[Acinetobacter		AOP62639.1 RHS repeat-associated core domain protein [Acinetobacter baumannii DU202]		60.69	1590	586	11	6	1582	97	7	1570	0.0	1939
ACJ56464.1_core_protein_Rhs2_nuclease_[Acinetobacter		SBS22505.1 Rhs family protein,Cell wall-associated polypeptide CWBP200,Uncharacterized conserved protein,YD repeat (two copies),RHS Repeat [Acinetobacter baumannii]		60.69	1590	586	11	6	1582	97	7	1570	0.0	1939
ACJ56464.1_core_protein_Rhs2_nuclease_[Acinetobacter		ANB89252.1 type IV secretion protein Rhs [Acinetobacter baumannii]		60.69	1590	586	11	6	1582	97	7	1570	0.0	1939
ACJ56464.1_core_protein_Rhs2_nuclease_[Acinetobacter		AML74885.1 type IV secretion protein Rhs [Acinetobacter baumannii]		60.69	1590	586	11	6	1582	97	7	1570	0.0	1939
ACJ56464.1_core_protein_Rhs2_nuclease_[Acinetobacter		AML71328.1 type IV secretion protein Rhs [Acinetobacter baumannii]		60.69	1590	586	11	6	1582	97	7	1570	0.0	1939
ACJ56464.1_core_protein_Rhs2_nuclease_[Acinetobacter		AML66639.1 type IV secretion protein Rhs [Acinetobacter baumannii]		60.69	1590	586	11	6	1582	97	7	1570	0.0	1939
ACJ56464.1_core_protein_Rhs2_nuclease_[Acinetobacter		AML64159.1 type IV secretion protein Rhs [Acinetobacter baumannii]		60.69	1590	586	11	6	1582	97	7	1570	0.0	1939
ACJ56464.1_core_protein_Rhs2_nuclease_[Acinetobacter		AMC14962.1 type IV secretion protein Rhs [Acinetobacter baumannii]		60.69	1590	586	11	6	1582	97	7	1570	0.0	1939
ACJ56464.1_core_protein_Rhs2_nuclease_[Acinetobacter		ALY00045.1 Type IV secretion protein Rhs [Acinetobacter baumannii]		60.69	1590	586	11	6	1582	97	7	1570	0.0	1939
ACJ56464.1_core_protein_Rhs2_nuclease_[Acinetobacter		AKJ46334.1 type IV secretion protein Rhs [Acinetobacter baumannii]		60.69	1590	586	11	6	1582	97	7	1570	0.0	1939
ACJ56464.1_core_protein_Rhs2_nuclease_[Acinetobacter		AIA52786.1 type IV secretion protein Rhs [Acinetobacter baumannii]		60.69	1590	586	11	6	1582	97	7	1570	0.0	1939
ACJ56464.1_core_protein_Rhs2_nuclease_[Acinetobacter		AHX64207.1 type IV secretion protein Rhs [Acinetobacter baumannii AC30]		60.69	1590	586	11	6	1582	97	7	1570	0.0	1939
ACJ56464.1_core_protein_Rhs2_nuclease_[Acinetobacter		AHJ92779.1 type IV secretion protein Rhs [Acinetobacter baumannii PKAB07]		60.69	1590	586	11	6	1582	97	7	1570	0.0	1939
ACJ56464.1_core_protein_Rhs2_nuclease_[Acinetobacter		BAN88192.1 RHS repeat-associated core domain protein [Acinetobacter baumannii NCGM 237]		60.69	1590	586	11	6	1582	97	7	1570	0.0	1939
ACJ56464.1_core_protein_Rhs2_nuclease_[Acinetobacter		AGQ09926.1 Rhs family protein [Acinetobacter baumannii BJAB0868]		60.69	1590	586	11	6	1582	97	7	1570	0.0	1939
ACJ56464.1_core_protein_Rhs2_nuclease_[Acinetobacter		AGQ13797.1 Rhs family protein [Acinetobacter baumannii BJAB07104]		60.69	1590	586	11	6	1582	97	7	1570	0.0	1939
ACJ56464.1_core_protein_Rhs2_nuclease_[Acinetobacter		AFU37726.1 Rhs family protein [Acinetobacter baumannii TYTH-1]		60.69	1590	586	11	6	1582	97	7	1570	0.0	1939
ACJ56464.1_core_protein_Rhs2_nuclease_[Acinetobacter		AFI96044.1 RHS repeat-associated core domain protein [Acinetobacter baumannii MDR-TJ]		60.69	1590	586	11	6	1582	97	7	1570	0.0	1939
ACJ56464.1_core_protein_Rhs2_nuclease_[Acinetobacter		AEP05879.1 Rhs family protein [Acinetobacter baumannii MDR-ZJ06]		60.69	1590	586	11	6	1582	97	7	1570	0.0	1939
ACJ56464.1_core_protein_Rhs2_nuclease_[Acinetobacter		ADX91868.1 Rhs family protein [Acinetobacter baumannii TCDC-AB0715]		60.69	1590	586	11	6	1582	97	7	1570	0.0	1939
ACJ56464.1_core_protein_Rhs2_nuclease_[Acinetobacter		ADX03345.1 Rhs family protein [Acinetobacter baumannii 1656-2]		60.69	1590	586	11	6	1582	97	7	1570	0.0	1939
ACJ56464.1_core_protein_Rhs2_nuclease_[Acinetobacter		ACC56574.1 Rhs family protein [Acinetobacter baumannii ACICU]		60.69	1590	586	11	6	1582	97	7	1570	0.0	1939
ACJ56464.1_core_protein_Rhs2_nuclease_[Acinetobacter		PJF02600.1 type IV secretion protein Rhs [Acinetobacter seifertii]		59.26	1517	563	12	6	1496	92	25	1512	0.0	1840
ACJ56464.1_core_protein_Rhs2_nuclease_[Acinetobacter		AVO91841.1 type IV secretion protein Rhs [Acinetobacter baumannii]		58.92	1519	569	10	6	1498	92	25	1514	0.0	1831
ACJ56464.1_core_protein_Rhs2_nuclease_[Acinetobacter		AVE54836.1 type IV secretion protein Rhs [Acinetobacter baumannii]		58.92	1519	569	10	6	1498	92	25	1514	0.0	1831
ACJ56464.1_core_protein_Rhs2_nuclease_[Acinetobacter		ATD20691.1 type IV secretion protein Rhs [Acinetobacter baumannii]		58.92	1519	569	10	6	1498	92	25	1514	0.0	1831
ACJ56464.1_core_protein_Rhs2_nuclease_[Acinetobacter		APJ20107.1 type IV secretion protein Rhs [Acinetobacter baumannii]		58.92	1519	569	10	6	1498	92	25	1514	0.0	1831
ACJ56464.1_core_protein_Rhs2_nuclease_[Acinetobacter		KMV01891.1 RHS repeat-associated core domain protein [Acinetobacter baumannii]		58.85	1519	570	11	6	1498	92	25	1514	0.0	1834
ACJ56464.1_core_protein_Rhs2_nuclease_[Acinetobacter		BAP67215.1 Rhs family protein [Acinetobacter baumannii]		58.85	1519	570	11	6	1498	92	25	1514	0.0	1834
ACJ56464.1_core_protein_Rhs2_nuclease_[Acinetobacter		ENV35528.1 hypothetical protein F960_00210 [Acinetobacter gerneri DSM 14967 = CIP 107464]		58.27	532	205	5	983	1501	58	1	528	0.0	629
ACJ56464.1_core_protein_Rhs2_nuclease_[Acinetobacter		PKF31562.1 type IV secretion protein Rhs [Acinetobacter proteolyticus]		57.18	1511	596	10	6	1496	92	25	1504	0.0	1761
ACJ56464.1_core_protein_Rhs2_nuclease_[Acinetobacter		OBY76095.1 type IV secretion protein Rhs [Acinetobacter gyllenbergii]		57.11	1511	597	10	6	1496	92	25	1504	0.0	1758
ACJ56464.1_core_protein_Rhs2_nuclease_[Acinetobacter		ESK43108.1 hypothetical protein F987_01989 [Acinetobacter gyllenbergii NIPH 230]		56.93	1516	602	10	6	1501	92	25	1509	0.0	1746
ACJ56464.1_core_protein_Rhs2_nuclease_[Acinetobacter		EOR08053.1 hypothetical protein I593_01407 [Acinetobacter tandoii DSM 14970 = CIP 107469]		51.46	1508	644	21	24	1506	91	33	1477	0.0	1484
ACJ56464.1_core_protein_Rhs2_nuclease_[Acinetobacter		SNQ29618.1 RHS repeat-associated core domain-containing protein [Acinetobacter apis]		51.16	1509	687	18	5	1496	92	4	1479	0.0	1545
ACJ56464.1_core_protein_Rhs2_nuclease_[Acinetobacter		ENV32716.1 hypothetical protein F960_03223 [Acinetobacter gerneri DSM 14967 = CIP 107464]		48.29	1518	724	16	6	1496	92	17	1500	0.0	1367
ACJ56464.1_core_protein_Rhs2_nuclease_[Acinetobacter		AOA58028.1 hypothetical protein BFG52_06455 [Acinetobacter larvae]		40.24	328	182	2	561	887	45	11	325	7e-73	247
ACJ56464.1_core_protein_Rhs2_nuclease_[Acinetobacter		AOX84676.1 Rhs family protein [Acinetobacter baumannii]		39.39	914	467	17	562	1459	55	62	904	0.0	625
ACJ56464.1_core_protein_Rhs2_nuclease_[Acinetobacter		ALH95481.1 RHS protein [Acinetobacter equi]		35.71	224	112	4	1316	1507	58	1366	1589	1e-31	132
ACJ56464.1_core_protein_Rhs2_nuclease_[Acinetobacter		OBY75706.1 type IV secretion protein Rhs [Acinetobacter gyllenbergii]		34.95	1256	675	27	277	1497	75	253	1401	0.0	711
ACJ56464.1_core_protein_Rhs2_nuclease_[Acinetobacter		AWL19953.1 type IV secretion protein Rhs [Acinetobacter nosocomialis]		34.88	1247	686	28	277	1499	75	252	1396	0.0	694
ACJ56464.1_core_protein_Rhs2_nuclease_[Acinetobacter		ARG17738.1 type IV secretion protein Rhs [Acinetobacter nosocomialis]		34.88	1247	686	28	277	1499	75	252	1396	0.0	694
ACJ56464.1_core_protein_Rhs2_nuclease_[Acinetobacter		AJB67544.1 type IV secretion protein Rhs [Acinetobacter baumannii]		34.57	1377	746	32	162	1506	83	152	1405	0.0	722
ACJ56464.1_core_protein_Rhs2_nuclease_[Acinetobacter		KMV01706.1 RHS repeat-associated core domain protein [Acinetobacter baumannii]		34.57	1377	746	32	162	1506	83	152	1405	0.0	719
ACJ56464.1_core_protein_Rhs2_nuclease_[Acinetobacter		BAP67459.1 hypothetical protein IOMTU433_2683 [Acinetobacter baumannii]		34.57	1377	746	32	162	1506	83	152	1405	0.0	719
ACJ56464.1_core_protein_Rhs2_nuclease_[Acinetobacter		CAP00739.1 putative Rhs family protein [Acinetobacter baumannii SDF]		34.20	1377	751	32	162	1506	83	153	1406	0.0	715
ACJ56464.1_core_protein_Rhs2_nuclease_[Acinetobacter		AVO91662.1 type IV secretion protein Rhs [Acinetobacter baumannii]		34.18	1372	758	32	162	1506	83	152	1405	0.0	717
ACJ56464.1_core_protein_Rhs2_nuclease_[Acinetobacter		AVE54656.1 type IV secretion protein Rhs [Acinetobacter baumannii]		34.18	1372	758	32	162	1506	83	152	1405	0.0	717
ACJ56464.1_core_protein_Rhs2_nuclease_[Acinetobacter		ATD18514.1 type IV secretion protein Rhs [Acinetobacter baumannii]		34.18	1372	758	32	162	1506	83	152	1405	0.0	717
ACJ56464.1_core_protein_Rhs2_nuclease_[Acinetobacter		APJ20344.1 type IV secretion protein Rhs [Acinetobacter baumannii]		34.18	1372	758	32	162	1506	83	152	1405	0.0	717
ACJ56464.1_core_protein_Rhs2_nuclease_[Acinetobacter		AIS05825.1 type IV secretion protein Rhs [Acinetobacter baumannii]		34.18	1372	758	32	162	1506	83	152	1405	0.0	717
ACJ56464.1_core_protein_Rhs2_nuclease_[Acinetobacter		AIL78115.1 type IV secretion protein Rhs [Acinetobacter baumannii]		34.18	1372	758	32	162	1506	83	152	1405	0.0	717
ACJ56464.1_core_protein_Rhs2_nuclease_[Acinetobacter		SQI56830.1 Rhs family protein [Acinetobacter baumannii]		34.11	1375	755	32	162	1506	83	152	1405	0.0	706
ACJ56464.1_core_protein_Rhs2_nuclease_[Acinetobacter		AVN13713.1 type IV secretion protein Rhs [Acinetobacter baumannii]		34.11	1375	755	32	162	1506	83	152	1405	0.0	706
ACJ56464.1_core_protein_Rhs2_nuclease_[Acinetobacter		ATY44872.1 Putative deoxyribonuclease RhsC [Acinetobacter baumannii]		34.11	1375	755	32	162	1506	83	152	1405	0.0	706
ACJ56464.1_core_protein_Rhs2_nuclease_[Acinetobacter		ATP88006.1 Putative deoxyribonuclease RhsC [Acinetobacter baumannii]		34.11	1375	755	32	162	1506	83	152	1405	0.0	706
ACJ56464.1_core_protein_Rhs2_nuclease_[Acinetobacter		ASF76507.1 Putative deoxyribonuclease RhsC [Acinetobacter baumannii]		34.11	1375	755	32	162	1506	83	152	1405	0.0	706
ACJ56464.1_core_protein_Rhs2_nuclease_[Acinetobacter		ALJ88606.1 hypothetical protein AN415_02704 [Acinetobacter baumannii]		34.11	1375	755	32	162	1506	83	152	1405	0.0	706
ACJ56464.1_core_protein_Rhs2_nuclease_[Acinetobacter		AJF81072.1 Protein rhsD precursor [Acinetobacter baumannii]		34.11	1375	755	32	162	1506	83	152	1405	0.0	706
ACJ56464.1_core_protein_Rhs2_nuclease_[Acinetobacter		ACJ56263.1 Protein rhsD precursor [Acinetobacter baumannii AB307-0294]		34.11	1375	755	32	162	1506	83	152	1405	0.0	706
ACJ56464.1_core_protein_Rhs2_nuclease_[Acinetobacter		ACJ40183.1 type IV secretion protein Rhs [Acinetobacter baumannii AB0057]		34.11	1375	755	32	162	1506	83	152	1405	0.0	706
ACJ56464.1_core_protein_Rhs2_nuclease_[Acinetobacter		AVF07887.1 type IV secretion protein Rhs [Acinetobacter baumannii]		34.11	1375	755	32	162	1506	83	152	1405	0.0	706
ACJ56464.1_core_protein_Rhs2_nuclease_[Acinetobacter		AKA32533.1 YD repeat protein [Acinetobacter baumannii]		34.11	1375	755	32	162	1506	83	152	1405	0.0	706
ACJ56464.1_core_protein_Rhs2_nuclease_[Acinetobacter		AOA59586.1 type IV secretion protein Rhs [Acinetobacter larvae]		33.29	1487	801	41	48	1495	89	56	1390	0.0	705
ACJ56464.1_core_protein_Rhs2_nuclease_[Acinetobacter		AGQ09792.1 Rhs family protein [Acinetobacter baumannii BJAB0868]		32.87	1527	841	38	17	1509	92	32	1408	0.0	724
ACJ56464.1_core_protein_Rhs2_nuclease_[Acinetobacter		AUM27024.1 type IV secretion protein Rhs [Acinetobacter pittii]		32.74	1524	846	37	17	1509	92	32	1407	0.0	725
ACJ56464.1_core_protein_Rhs2_nuclease_[Acinetobacter		ARG26400.1 type IV secretion protein Rhs [Acinetobacter baumannii]		32.61	1524	849	37	17	1509	92	32	1408	0.0	723
ACJ56464.1_core_protein_Rhs2_nuclease_[Acinetobacter		ARG24687.1 type IV secretion protein Rhs [Acinetobacter baumannii]		32.61	1524	849	37	17	1509	92	32	1408	0.0	723
ACJ56464.1_core_protein_Rhs2_nuclease_[Acinetobacter		ARG21230.1 type IV secretion protein Rhs [Acinetobacter baumannii]		32.61	1524	849	37	17	1509	92	32	1408	0.0	723
ACJ56464.1_core_protein_Rhs2_nuclease_[Acinetobacter		BAN88308.1 RHS repeat-associated core domain protein [Acinetobacter baumannii NCGM 237]		32.61	1524	849	37	17	1509	92	33	1409	0.0	721
ACJ56464.1_core_protein_Rhs2_nuclease_[Acinetobacter		AWW81989.1 type IV secretion protein Rhs [Acinetobacter baumannii]		32.61	1524	849	37	17	1509	92	32	1408	0.0	721
ACJ56464.1_core_protein_Rhs2_nuclease_[Acinetobacter		AWS02988.1 type IV secretion protein Rhs [Acinetobacter baumannii]		32.61	1524	849	37	17	1509	92	32	1408	0.0	721
ACJ56464.1_core_protein_Rhs2_nuclease_[Acinetobacter		AWO16033.1 type IV secretion protein Rhs [Acinetobacter baumannii]		32.61	1524	849	37	17	1509	92	32	1408	0.0	721
ACJ56464.1_core_protein_Rhs2_nuclease_[Acinetobacter		AVN07103.1 RHS repeat-associated core domain protein [Acinetobacter baumannii]		32.61	1524	849	37	17	1509	92	32	1408	0.0	721
ACJ56464.1_core_protein_Rhs2_nuclease_[Acinetobacter		AVO88685.1 type IV secretion protein Rhs [Acinetobacter baumannii]		32.61	1524	849	37	17	1509	92	32	1408	0.0	721
ACJ56464.1_core_protein_Rhs2_nuclease_[Acinetobacter		AVE90961.1 type IV secretion protein Rhs [Acinetobacter baumannii]		32.61	1524	849	37	17	1509	92	32	1408	0.0	721
ACJ56464.1_core_protein_Rhs2_nuclease_[Acinetobacter		AVE45481.1 type IV secretion protein Rhs [Acinetobacter baumannii]		32.61	1524	849	37	17	1509	92	32	1408	0.0	721
ACJ56464.1_core_protein_Rhs2_nuclease_[Acinetobacter		AUG13979.1 type IV secretion protein Rhs [Acinetobacter baumannii]		32.61	1524	849	37	17	1509	92	32	1408	0.0	721
ACJ56464.1_core_protein_Rhs2_nuclease_[Acinetobacter		ATU57028.1 type IV secretion protein Rhs [Acinetobacter baumannii]		32.61	1524	849	37	17	1509	92	32	1408	0.0	721
ACJ56464.1_core_protein_Rhs2_nuclease_[Acinetobacter		ATU53427.1 type IV secretion protein Rhs [Acinetobacter baumannii]		32.61	1524	849	37	17	1509	92	32	1408	0.0	721
ACJ56464.1_core_protein_Rhs2_nuclease_[Acinetobacter		ATU49693.1 type IV secretion protein Rhs [Acinetobacter baumannii]		32.61	1524	849	37	17	1509	92	32	1408	0.0	721
ACJ56464.1_core_protein_Rhs2_nuclease_[Acinetobacter		ARF92211.1 type IV secretion protein Rhs [Acinetobacter baumannii]		32.61	1524	849	37	17	1509	92	32	1408	0.0	721
ACJ56464.1_core_protein_Rhs2_nuclease_[Acinetobacter		APM49564.1 type IV secretion protein Rhs [Acinetobacter baumannii]		32.61	1524	849	37	17	1509	92	32	1408	0.0	721
ACJ56464.1_core_protein_Rhs2_nuclease_[Acinetobacter		APF44378.1 type IV secretion protein Rhs [Acinetobacter baumannii]		32.61	1524	849	37	17	1509	92	32	1408	0.0	721
ACJ56464.1_core_protein_Rhs2_nuclease_[Acinetobacter		SBS22710.1 Rhs family protein,Cell wall-associated polypeptide CWBP200,Uncharacterized conserved protein,YD repeat (two copies),RHS Repeat [Acinetobacter baumannii]		32.61	1524	849	37	17	1509	92	32	1408	0.0	721
ACJ56464.1_core_protein_Rhs2_nuclease_[Acinetobacter		AML75039.1 type IV secretion protein Rhs [Acinetobacter baumannii]		32.61	1524	849	37	17	1509	92	32	1408	0.0	721
ACJ56464.1_core_protein_Rhs2_nuclease_[Acinetobacter		AMC14824.1 type IV secretion protein Rhs [Acinetobacter baumannii]		32.61	1524	849	37	17	1509	92	32	1408	0.0	721
ACJ56464.1_core_protein_Rhs2_nuclease_[Acinetobacter		ALY00197.1 RHS repeat-associated core domain protein [Acinetobacter baumannii]		32.61	1524	849	37	17	1509	92	32	1408	0.0	721
ACJ56464.1_core_protein_Rhs2_nuclease_[Acinetobacter		AKJ46478.1 type IV secretion protein Rhs [Acinetobacter baumannii]		32.61	1524	849	37	17	1509	92	32	1408	0.0	721
ACJ56464.1_core_protein_Rhs2_nuclease_[Acinetobacter		AGQ13669.1 Rhs family protein [Acinetobacter baumannii BJAB07104]		32.61	1524	849	37	17	1509	92	32	1408	0.0	721
ACJ56464.1_core_protein_Rhs2_nuclease_[Acinetobacter		AFU37587.1 Rhs family protein [Acinetobacter baumannii TYTH-1]		32.61	1524	849	37	17	1509	92	32	1408	0.0	721
ACJ56464.1_core_protein_Rhs2_nuclease_[Acinetobacter		AFI96201.1 RHS repeat-associated core domain protein [Acinetobacter baumannii MDR-TJ]		32.61	1524	849	37	17	1509	92	32	1408	0.0	721
ACJ56464.1_core_protein_Rhs2_nuclease_[Acinetobacter		AEP05726.1 Rhs family protein [Acinetobacter baumannii MDR-ZJ06]		32.61	1524	849	37	17	1509	92	32	1408	0.0	721
ACJ56464.1_core_protein_Rhs2_nuclease_[Acinetobacter		ADX91713.1 Rhs family protein [Acinetobacter baumannii TCDC-AB0715]		32.61	1524	849	37	17	1509	92	32	1408	0.0	721
ACJ56464.1_core_protein_Rhs2_nuclease_[Acinetobacter		ACC56430.1 Rhs family protein [Acinetobacter baumannii ACICU]		32.61	1524	849	37	17	1509	92	32	1408	0.0	721
ACJ56464.1_core_protein_Rhs2_nuclease_[Acinetobacter		AVG27357.1 type IV secretion protein Rhs [Acinetobacter baumannii]		32.55	1524	850	37	17	1509	92	32	1408	0.0	721
ACJ56464.1_core_protein_Rhs2_nuclease_[Acinetobacter		APQ93616.1 type IV secretion protein Rhs [Acinetobacter baumannii]		32.55	1524	850	37	17	1509	92	32	1408	0.0	721
ACJ56464.1_core_protein_Rhs2_nuclease_[Acinetobacter		APQ89839.1 type IV secretion protein Rhs [Acinetobacter baumannii]		32.55	1524	850	37	17	1509	92	32	1408	0.0	721
ACJ56464.1_core_protein_Rhs2_nuclease_[Acinetobacter		APQ85982.1 type IV secretion protein Rhs [Acinetobacter baumannii]		32.55	1524	850	37	17	1509	92	32	1408	0.0	721
ACJ56464.1_core_protein_Rhs2_nuclease_[Acinetobacter		APJ23952.1 type IV secretion protein Rhs [Acinetobacter baumannii]		32.55	1524	850	37	17	1509	92	32	1408	0.0	721
ACJ56464.1_core_protein_Rhs2_nuclease_[Acinetobacter		ANB89396.1 type IV secretion protein Rhs [Acinetobacter baumannii]		32.55	1524	850	37	17	1509	92	32	1408	0.0	721
ACJ56464.1_core_protein_Rhs2_nuclease_[Acinetobacter		ENV16797.1 hypothetical protein F964_02545 [Acinetobacter guillouiae NIPH 991]		32.50	1480	832	34	48	1499	89	71	1411	0.0	726
ACJ56464.1_core_protein_Rhs2_nuclease_[Acinetobacter		EPF74236.1 hypothetical protein F945_01603 [Acinetobacter rudis CIP 110305]		32.29	1499	826	35	35	1497	90	43	1388	0.0	701
ACJ56464.1_core_protein_Rhs2_nuclease_[Acinetobacter		EPF71085.1 hypothetical protein F945_02848 [Acinetobacter rudis CIP 110305]		32.10	1508	815	35	35	1496	90	43	1387	0.0	702
ACJ56464.1_core_protein_Rhs2_nuclease_[Acinetobacter		ENU58069.1 hypothetical protein F981_02357 [Acinetobacter guillouiae CIP 63.46]		32.07	1506	826	33	42	1498	90	63	1420	0.0	717
ACJ56464.1_core_protein_Rhs2_nuclease_[Acinetobacter		ATZ62854.1 type IV secretion protein Rhs [Acinetobacter bereziniae]		32.06	1516	844	32	42	1511	91	63	1438	0.0	720
ACJ56464.1_core_protein_Rhs2_nuclease_[Acinetobacter		AOX96243.1 Rhs family protein [Acinetobacter baumannii]		32.02	1474	824	37	17	1459	89	32	1358	0.0	671
ACJ56464.1_core_protein_Rhs2_nuclease_[Acinetobacter		AOX92387.1 Rhs family protein [Acinetobacter baumannii]		32.02	1474	824	37	17	1459	89	32	1358	0.0	671
ACJ56464.1_core_protein_Rhs2_nuclease_[Acinetobacter		AOX88550.1 Rhs family protein [Acinetobacter baumannii]		32.02	1474	824	37	17	1459	89	32	1358	0.0	671
ACJ56464.1_core_protein_Rhs2_nuclease_[Acinetobacter		AOX82053.1 Rhs family protein [Acinetobacter baumannii]		32.02	1474	824	37	17	1459	89	32	1358	0.0	671
ACJ56464.1_core_protein_Rhs2_nuclease_[Acinetobacter		AOX72975.1 Putative deoxyribonuclease RhsC [Acinetobacter baumannii]		32.02	1474	824	37	17	1459	89	32	1358	0.0	671
ACJ56464.1_core_protein_Rhs2_nuclease_[Acinetobacter		BAP36559.1 hypothetical protein AS4_16190 [Acinetobacter guillouiae]		31.95	1493	842	33	42	1498	90	63	1417	0.0	712
ADF61365.1		EPG42735.1 hypothetical protein F907_00159 [Acinetobacter colistiniresistens]		33.28	649	350	21	2	603	98	3	615	3e-99	317
ADM97066.1	Rhs-family protein RhsA DNAse [Dickeya dadantii 3937]	ENV33198.1 hypothetical protein F960_02564 [Acinetobacter gerneri DSM 14967 = CIP 107464]		41.46	123	54	3	1207	1313	55	1445	1565	1e-19	93.2
ADM97066.1		ADY81214.1 hypothetical protein BDGL_000628 [Acinetobacter pittii PHEA-2]		35.59	59	36	2	456	514	48	154	210	1.3	30.4
ADM97066.1		ADY81214.1 hypothetical protein BDGL_000628 [Acinetobacter pittii PHEA-2]		34.85	66	42	1	824	889	48	161	225	11	37.4
ADM97066.1		ALH95481.1 RHS protein [Acinetobacter equi]		34.18	158	86	4	1207	1347	71	1468	1624	4e-18	88.2
ADM97066.1		EOR08051.1 hypothetical protein I593_01405 [Acinetobacter tandoii DSM 14970 = CIP 107469]		33.86	127	81	3	772	896	43	4	129	9e-13	67.0
ADM97066.1		ADY81214.1 hypothetical protein BDGL_000628 [Acinetobacter pittii PHEA-2]		30.31	419	216	16	953	1305	48	4	412	5e-35	139
ADM97066.1		AOA59584.1 hypothetical protein BFG52_15350 [Acinetobacter larvae]		30.05	213	117	9	957	1158	47	43	234	6e-12	65.9
AEN64673.1		ENV75491.1 hypothetical protein F944_02596 [Acinetobacter ursingii DSM 16037 = CIP 107286]		31.44	369	180	16	58	413	44	28	336	4e-32	129
AEN64673.1		ADI91675.1 hypothetical protein AOLE_13940 [Acinetobacter oleivorans DR1]		30.08	369	182	14	58	413	44	28	333	6e-30	122
AHG23406.1	AtxH (plasmid) Phospholipase Tle4 [Pantoea ananatis PA-4]	AMW78934.1 hypothetical protein AMD27_08620 [Acinetobacter sp. TGL-Y2]		32.38	454	224	20	49	438	70	34	468	7e-43	159
AHG23406.1		ENV15135.1 hypothetical protein F964_03857 [Acinetobacter guillouiae NIPH 991]		31.47	429	234	16	50	439	70	35	442	4e-46	169
AHG23406.1		ENV34353.1 hypothetical protein F960_01420 [Acinetobacter gerneri DSM 14967 = CIP 107464]		31.28	454	217	22	61	449	70	53	476	4e-40	151
AHG23406.1		ADY80943.1 hypothetical protein BDGL_000357 [Acinetobacter pittii PHEA-2]		30.87	583	304	24	39	552	92	16	568	1e-57	202
AHG23406.1		EPF69889.1 hypothetical protein F945_03638 [Acinetobacter rudis CIP 110305]		30.81	568	296	23	49	552	91	26	560	7e-55	194
AHG23406.1		ENV55380.1 hypothetical protein F952_00660 [Acinetobacter baylyi DSM 14961 = CIP 107474]		30.65	584	304	24	39	552	92	16	568	3e-56	198
AHG23406.1		CAG70081.1 conserved hypothetical protein [Acinetobacter sp. ADP1]		30.65	584	304	24	39	552	92	16	568	3e-56	198
AHG23406.1		OBY74177.1 hypothetical protein NG55_10050 [Acinetobacter gyllenbergii]		30.60	464	248	20	34	450	75	25	461	1e-45	168
AHG23406.1		AOA59609.1 alpha/beta hydrolase [Acinetobacter larvae]		30.57	592	277	24	49	552	91	30	575	6e-53	189
AHG23406.1		APV36698.1 alpha/beta hydrolase [Acinetobacter soli]		30.53	583	305	23	39	552	92	16	567	6e-58	202
AHG23406.1		AUM27061.1 alpha/beta hydrolase [Acinetobacter pittii]		30.31	584	303	24	39	552	92	16	565	1e-53	191
AHM72170.1	Phospholipases (DUF2235), Tle1 [Yersinia enterocolitica LC20]	APX61752.1 hypothetical protein AsACE_CH00305 [Acinetobacter schindleri]		42.86	35	15	2	658	692	45	503	532	1.0	30.0
AHM72170.1		ADI91675.1 hypothetical protein AOLE_13940 [Acinetobacter oleivorans DR1]		37.84	37	18	2	656	692	49	480	511	1.3	29.6
AHM72170.1		ENV75491.1 hypothetical protein F944_02596 [Acinetobacter ursingii DSM 16037 = CIP 107286]		32.42	401	205	19	60	454	49	28	368	2e-32	130
AHM72170.1		AMO41438.1 hypothetical protein A0J50_12850 [Acinetobacter sp. DUT-2]		31.10	373	177	17	60	415	44	27	336	2e-30	124
AHM72170.1		AUT35236.1 DUF2235 domain-containing protein [Acinetobacter pittii]		31.10	373	177	17	60	415	44	27	336	2e-30	124
AHM72170.1		ADI91675.1 hypothetical protein AOLE_13940 [Acinetobacter oleivorans DR1]		31.08	370	179	17	60	415	49	28	335	3e-32	129
AHM72170.1		APX61752.1 hypothetical protein AsACE_CH00305 [Acinetobacter schindleri]		30.28	360	167	17	57	389	45	19	321	5e-30	123
AHW84487.1		ENV15135.1 hypothetical protein F964_03857 [Acinetobacter guillouiae NIPH 991]		30.68	453	227	18	25	439	70	38	441	7e-46	169
AHW93426.1	Phospholipase Tle4 [Enterobacter asburiae L1]	AUM27061.1 alpha/beta hydrolase [Acinetobacter pittii]		32.24	580	297	25	39	552	92	16	565	4e-57	200
AHW93426.1		EPF69889.1 hypothetical protein F945_03638 [Acinetobacter rudis CIP 110305]		32.24	580	272	26	49	552	91	26	560	2e-61	212
AHW93426.1		ADY80943.1 hypothetical protein BDGL_000357 [Acinetobacter pittii PHEA-2]		32.19	584	295	26	39	552	92	16	568	1e-58	204
AHW93426.1		OBY74177.1 hypothetical protein NG55_10050 [Acinetobacter gyllenbergii]		32.03	462	244	19	34	450	75	25	461	8e-52	186
AHW93426.1		AMW78934.1 hypothetical protein AMD27_08620 [Acinetobacter sp. TGL-Y2]		31.87	455	225	18	49	438	81	34	468	3e-44	164
AHW93426.1		APV36698.1 alpha/beta hydrolase [Acinetobacter soli]		31.79	582	299	25	39	552	92	16	567	3e-59	206
AHW93426.1		ENV15135.1 hypothetical protein F964_03857 [Acinetobacter guillouiae NIPH 991]		31.77	469	255	18	50	477	77	35	479	7e-48	174
AHW93426.1		ENV55380.1 hypothetical protein F952_00660 [Acinetobacter baylyi DSM 14961 = CIP 107474]		31.22	583	302	26	39	552	92	16	568	5e-57	200
AHW93426.1		CAG70081.1 conserved hypothetical protein [Acinetobacter sp. ADP1]		31.22	583	302	26	39	552	92	16	568	5e-57	200
AHW93426.1		ENV34353.1 hypothetical protein F960_01420 [Acinetobacter gerneri DSM 14967 = CIP 107464]		31.19	452	220	22	61	449	70	53	476	2e-41	155
AHW93426.1		AOA59609.1 alpha/beta hydrolase [Acinetobacter larvae]		30.51	590	280	23	49	552	91	30	575	2e-53	190
AIU87498.1	Phospholipase Tle1 [Pectobacterium carotovorum subsp. odoriferum]	ARN31844.1 hypothetical protein A4U85_14160 [Acinetobacter baumannii]		30.87	392	176	20	51	419	46	26	345	1e-26	112
AIU87498.1		AMX18511.1 hypothetical protein IEC338SC_1369 [Acinetobacter pittii]		30.83	386	184	19	51	419	46	26	345	2e-25	108
AIU87498.1		AUT35236.1 DUF2235 domain-containing protein [Acinetobacter pittii]		30.61	379	183	14	55	414	45	19	336	3e-30	124
AIU87498.1		AMO41438.1 hypothetical protein A0J50_12850 [Acinetobacter sp. DUT-2]		30.61	379	183	14	55	414	45	19	336	3e-30	124
AIU87498.1		PJG65429.1 hypothetical protein CVD09_16335, partial [Acinetobacter seifertii]		30.05	376	196	17	51	420	46	26	340	4e-26	108
AIU87498.1		APX61752.1 hypothetical protein AsACE_CH00305 [Acinetobacter schindleri]		30.00	350	172	15	55	383	41	19	316	2e-32	130
AIU89177.1		EPG42735.1 hypothetical protein F907_00159 [Acinetobacter colistiniresistens]		32.66	643	367	18	2	613	97	3	610	3e-88	288
AIW99145.1	Lysozyme_like domain [Klebsiella pneumoniae]	ENV74712.1 hypothetical protein F944_03089 [Acinetobacter ursingii DSM 16037 = CIP 107286]		41.56	154	84	4	4	154	82	5	155	8e-26	102
AIW99145.1		ENV14961.1 hypothetical protein F964_04549, partial [Acinetobacter guillouiae NIPH 991]		41.07	168	97	2	4	171	91	5	170	1e-35	124
AIW99145.1		ALV74554.1 peptidase, M23 family protein [Acinetobacter johnsonii XBB1]		40.88	159	91	3	4	161	86	5	161	2e-30	115
AIW99145.1		ANC38720.1 peptidase M23 [Acinetobacter baumannii]		40.46	173	94	5	4	170	91	5	174	8e-31	117
AIW99145.1		AMO42308.1 peptidase M23 [Acinetobacter sp. DUT-2]		39.53	172	97	4	4	170	91	5	174	7e-31	117
AIW99145.1		AJB46697.1 hypothetical protein RR32_00580 [Acinetobacter nosocomialis]		39.41	170	96	4	4	171	91	6	170	2e-18	80.9
AIW99145.1		AVE88744.1 LysM peptidoglycan-binding domain-containing protein [Acinetobacter baumannii]		39.29	84	47	2	4	84	44	5	87	2e-11	55.5
AIW99145.1		AUG12744.1 LysM peptidoglycan-binding domain-containing protein [Acinetobacter baumannii]		39.29	84	47	2	4	84	44	5	87	2e-11	55.5
AIW99145.1		ATU51155.1 LysM peptidoglycan-binding domain-containing protein [Acinetobacter baumannii]		39.29	84	47	2	4	84	44	5	87	2e-11	55.5
AIW99145.1		ARG28553.1 peptidase M23 [Acinetobacter baumannii]		39.29	84	47	2	4	84	44	5	87	2e-11	55.5
AIW99145.1		ARG23393.1 peptidase M23 [Acinetobacter baumannii]		39.29	84	47	2	4	84	44	5	87	2e-11	55.5
AIW99145.1		APQ87562.1 hypothetical protein AOT17_00575 [Acinetobacter baumannii]		39.29	84	47	2	4	84	44	5	87	2e-11	55.5
AIW99145.1		APM47344.1 hypothetical protein BS615_00600 [Acinetobacter baumannii]		39.29	84	47	2	4	84	44	5	87	2e-11	55.5
AIW99145.1		AML68752.1 hypothetical protein AYR68_17475 [Acinetobacter baumannii]		39.29	84	47	2	4	84	44	5	87	2e-11	55.5
AIW99145.1		AMC17238.1 hypothetical protein AXA63_17480 [Acinetobacter baumannii]		39.29	84	47	2	4	84	44	5	87	2e-11	55.5
AIW99145.1		ALX97693.1 hypothetical protein KBNAB1_0112 [Acinetobacter baumannii]		39.29	84	47	2	4	84	44	5	87	2e-11	55.5
AIW99145.1		AGQ12159.1 hypothetical protein BJAB0868_03612 [Acinetobacter baumannii BJAB0868]		39.29	84	47	2	4	84	44	5	87	2e-11	55.5
AIW99145.1		AGQ16025.1 hypothetical protein BJAB07104_03659 [Acinetobacter baumannii BJAB07104]		39.29	84	47	2	4	84	44	5	87	2e-11	55.5
AIW99145.1		ADX94187.1 hypothetical protein ABTW07_3770 [Acinetobacter baumannii TCDC-AB0715]		39.29	84	47	2	4	84	44	5	87	2e-11	55.5
AIW99145.1		AWW79631.1 transglycosylase [Acinetobacter baumannii]		38.96	154	88	4	4	154	82	5	155	9e-23	93.6
AIW99145.1		AWW75974.1 transglycosylase [Acinetobacter baumannii]		38.96	154	88	4	4	154	82	5	155	9e-23	93.6
AIW99145.1		AWS01761.1 transglycosylase [Acinetobacter baumannii]		38.96	154	88	4	4	154	82	5	155	9e-23	93.6
AIW99145.1		AVO86428.1 LysM peptidoglycan-binding domain-containing protein [Acinetobacter baumannii]		38.96	154	88	4	4	154	82	5	155	9e-23	93.6
AIW99145.1		AVG25140.1 LysM peptidoglycan-binding domain-containing protein [Acinetobacter baumannii]		38.96	154	88	4	4	154	82	5	155	9e-23	93.6
AIW99145.1		ATU54766.1 transglycosylase [Acinetobacter baumannii]		38.96	154	88	4	4	154	82	5	155	9e-23	93.6
AIW99145.1		ATU47480.1 transglycosylase [Acinetobacter baumannii]		38.96	154	88	4	4	154	82	5	155	9e-23	93.6
AIW99145.1		ATU24975.1 hypothetical protein AYP_003744 [Acinetobacter baumannii]		38.96	154	88	4	4	154	82	5	155	9e-23	93.6
AIW99145.1		ARG11992.1 transglycosylase [Acinetobacter baumannii]		38.96	154	88	4	4	154	82	5	155	9e-23	93.6
AIW99145.1		ARG10904.1 transglycosylase [Acinetobacter baumannii]		38.96	154	88	4	4	154	82	5	155	9e-23	93.6
AIW99145.1		ARG00388.1 transglycosylase [Acinetobacter baumannii]		38.96	154	88	4	4	154	82	5	155	9e-23	93.6
AIW99145.1		ARF96879.1 transglycosylase [Acinetobacter baumannii]		38.96	154	88	4	4	154	82	5	155	9e-23	93.6
AIW99145.1		ARF93239.1 transglycosylase [Acinetobacter baumannii]		38.96	154	88	4	4	154	82	5	155	9e-23	93.6
AIW99145.1		APQ91335.1 transglycosylase [Acinetobacter baumannii]		38.96	154	88	4	4	154	82	5	155	9e-23	93.6
AIW99145.1		APQ83699.1 transglycosylase [Acinetobacter baumannii]		38.96	154	88	4	4	154	82	5	155	9e-23	93.6
AIW99145.1		APJ21663.1 transglycosylase [Acinetobacter baumannii]		38.96	154	88	4	4	154	82	5	155	9e-23	93.6
AIW99145.1		APF42070.1 transglycosylase [Acinetobacter baumannii]		38.96	154	88	4	4	154	82	5	155	9e-23	93.6
AIW99145.1		AOX98674.1 Peptidase, M23 family [Acinetobacter baumannii]		38.96	154	88	4	4	154	82	5	155	9e-23	93.6
AIW99145.1		AOX94827.1 Peptidase, M23 family [Acinetobacter baumannii]		38.96	154	88	4	4	154	82	5	155	9e-23	93.6
AIW99145.1		AOX90969.1 Peptidase, M23 family [Acinetobacter baumannii]		38.96	154	88	4	4	154	82	5	155	9e-23	93.6
AIW99145.1		AOX87127.1 Peptidase, M23 family [Acinetobacter baumannii]		38.96	154	88	4	4	154	82	5	155	9e-23	93.6
AIW99145.1		AOX79602.1 Peptidase, M23 family [Acinetobacter baumannii]		38.96	154	88	4	4	154	82	5	155	9e-23	93.6
AIW99145.1		AOX75438.1 Peptidase, M23 family [Acinetobacter baumannii]		38.96	154	88	4	4	154	82	5	155	9e-23	93.6
AIW99145.1		SBS20257.1 metalloendopeptidase-like membrane protein, Glycyl-glycine endopeptidase ALE-1 precursor, membrane-bound lytic murein transglycosylase D, Membrane-bound metallopeptidase,Peptidase family M23 [Acinetobacter baumannii]		38.96	154	88	4	4	154	82	5	155	9e-23	93.6
AIW99145.1		AML72784.1 transglycosylase [Acinetobacter baumannii]		38.96	154	88	4	4	154	82	5	155	9e-23	93.6
AIW99145.1		AKJ44095.1 transglycosylase [Acinetobacter baumannii]		38.96	154	88	4	4	154	82	5	155	9e-23	93.6
AIW99145.1		AIA51580.1 transglycosylase [Acinetobacter baumannii]		38.96	154	88	4	4	154	82	5	155	9e-23	93.6
AIW99145.1		AHX63762.1 transglycosylase [Acinetobacter baumannii AC30]		38.96	154	88	4	4	154	82	5	155	9e-23	93.6
AIW99145.1		AHJ95158.1 transglycosylase [Acinetobacter baumannii PKAB07]		38.96	154	88	4	4	154	82	5	155	9e-23	93.6
AIW99145.1		ARD27423.1 transglycosylase [Acinetobacter lactucae]		38.31	154	89	4	4	154	82	5	155	3e-22	92.0
AIW99145.1		AQZ83519.1 hypothetical protein BUM88_19000 [Acinetobacter calcoaceticus]		38.30	47	26	1	4	50	84	108	151	24	32.3
AIW99145.1		ENV32563.1 hypothetical protein F960_03257 [Acinetobacter gerneri DSM 14967 = CIP 107464]		37.74	159	93	4	4	159	85	5	160	4e-25	100
AIW99145.1		AFI93786.1 metalloendopeptidase-like membrane protein [Acinetobacter baumannii MDR-TJ]		36.28	113	67	3	4	113	60	5	115	1e-13	62.4
AIW99145.1		APX64088.1 peptidase M23 family protein [Acinetobacter schindleri]		33.70	181	116	4	1	180	98	4	181	8e-21	87.8
AJJ02469.1		EPG42735.1 hypothetical protein F907_00159 [Acinetobacter colistiniresistens]		32.44	632	350	16	5	571	97	3	622	1e-86	282
AKL04938.1		APX61752.1 hypothetical protein AsACE_CH00305 [Acinetobacter schindleri]		30.47	338	186	14	55	383	41	19	316	1e-29	121
AKL04938.1		AMX18511.1 hypothetical protein IEC338SC_1369 [Acinetobacter pittii]		30.11	362	188	14	51	407	44	26	327	1e-24	106
AKL04938.1		ADI91675.1 hypothetical protein AOLE_13940 [Acinetobacter oleivorans DR1]		30.05	366	199	14	53	414	45	23	335	3e-31	127
AKQ25294.1	peptidase, M23 family protein Tse4 [Acinetobacter baumannii ATCC17978_mff]	AMO42308.1 peptidase M23 [Acinetobacter sp. DUT-2]	Peptidase_M23 (665-776)	97.82	824	6	1	1	812	100	1	824	0.0	1564
AKQ25294.1		ALV74554.1 peptidase, M23 family protein [Acinetobacter johnsonii XBB1]		78.60	827	161	3	1	812	100	1	826	0.0	1298
AKQ25294.1		ENV14806.1 hypothetical protein F964_04550, partial [Acinetobacter guillouiae NIPH 991]		66.83	597	190	4	218	812	73	37	627	0.0	820
AKQ25294.1		APX64088.1 peptidase M23 family protein [Acinetobacter schindleri]		47.06	136	64	3	667	798	74	536	667	1e-31	129
AKQ25294.1		ARD27423.1 transglycosylase [Acinetobacter lactucae]		39.58	192	88	6	612	799	87	499	666	6e-31	127
AKQ25294.1		ENV32563.1 hypothetical protein F960_03257 [Acinetobacter gerneri DSM 14967 = CIP 107464]		38.19	199	95	6	604	798	87	485	659	3e-31	127
AKQ25294.1		AJB46697.1 hypothetical protein RR32_00580 [Acinetobacter nosocomialis]		37.82	156	77	4	667	802	74	608	763	3e-20	93.2
AKQ25294.1		ENV74712.1 hypothetical protein F944_03089 [Acinetobacter ursingii DSM 16037 = CIP 107286]		37.37	190	92	5	614	799	84	510	676	2e-27	115
AKQ25294.1		AWW79631.1 transglycosylase [Acinetobacter baumannii]		36.36	242	115	9	562	799	95	463	669	4e-32	130
AKQ25294.1		AWW75974.1 transglycosylase [Acinetobacter baumannii]		36.36	242	115	9	562	799	95	463	669	4e-32	130
AKQ25294.1		AWS01761.1 transglycosylase [Acinetobacter baumannii]		36.36	242	115	9	562	799	95	463	669	4e-32	130
AKQ25294.1		AVO86428.1 LysM peptidoglycan-binding domain-containing protein [Acinetobacter baumannii]		36.36	242	115	9	562	799	95	463	669	4e-32	130
AKQ25294.1		AVG25140.1 LysM peptidoglycan-binding domain-containing protein [Acinetobacter baumannii]		36.36	242	115	9	562	799	95	463	669	4e-32	130
AKQ25294.1		ATU54766.1 transglycosylase [Acinetobacter baumannii]		36.36	242	115	9	562	799	95	463	669	4e-32	130
AKQ25294.1		ATU47480.1 transglycosylase [Acinetobacter baumannii]		36.36	242	115	9	562	799	95	463	669	4e-32	130
AKQ25294.1		ATU24975.1 hypothetical protein AYP_003744 [Acinetobacter baumannii]		36.36	242	115	9	562	799	95	463	669	4e-32	130
AKQ25294.1		ARG11992.1 transglycosylase [Acinetobacter baumannii]		36.36	242	115	9	562	799	95	463	669	4e-32	130
AKQ25294.1		ARG10904.1 transglycosylase [Acinetobacter baumannii]		36.36	242	115	9	562	799	95	463	669	4e-32	130
AKQ25294.1		ARG00388.1 transglycosylase [Acinetobacter baumannii]		36.36	242	115	9	562	799	95	463	669	4e-32	130
AKQ25294.1		ARF96879.1 transglycosylase [Acinetobacter baumannii]		36.36	242	115	9	562	799	95	463	669	4e-32	130
AKQ25294.1		ARF93239.1 transglycosylase [Acinetobacter baumannii]		36.36	242	115	9	562	799	95	463	669	4e-32	130
AKQ25294.1		APQ91335.1 transglycosylase [Acinetobacter baumannii]		36.36	242	115	9	562	799	95	463	669	4e-32	130
AKQ25294.1		APQ83699.1 transglycosylase [Acinetobacter baumannii]		36.36	242	115	9	562	799	95	463	669	4e-32	130
AKQ25294.1		APJ21663.1 transglycosylase [Acinetobacter baumannii]		36.36	242	115	9	562	799	95	463	669	4e-32	130
AKQ25294.1		APF42070.1 transglycosylase [Acinetobacter baumannii]		36.36	242	115	9	562	799	95	463	669	4e-32	130
AKQ25294.1		AOX98674.1 Peptidase, M23 family [Acinetobacter baumannii]		36.36	242	115	9	562	799	95	463	669	4e-32	130
AKQ25294.1		AOX94827.1 Peptidase, M23 family [Acinetobacter baumannii]		36.36	242	115	9	562	799	95	463	669	4e-32	130
AKQ25294.1		AOX90969.1 Peptidase, M23 family [Acinetobacter baumannii]		36.36	242	115	9	562	799	95	463	669	4e-32	130
AKQ25294.1		AOX87127.1 Peptidase, M23 family [Acinetobacter baumannii]		36.36	242	115	9	562	799	95	463	669	4e-32	130
AKQ25294.1		AOX79602.1 Peptidase, M23 family [Acinetobacter baumannii]		36.36	242	115	9	562	799	95	463	669	4e-32	130
AKQ25294.1		AOX75438.1 Peptidase, M23 family [Acinetobacter baumannii]		36.36	242	115	9	562	799	95	463	669	4e-32	130
AKQ25294.1		SBS20257.1 metalloendopeptidase-like membrane protein, Glycyl-glycine endopeptidase ALE-1 precursor, membrane-bound lytic murein transglycosylase D, Membrane-bound metallopeptidase,Peptidase family M23 [Acinetobacter baumannii]		36.36	242	115	9	562	799	95	463	669	4e-32	130
AKQ25294.1		AML72784.1 transglycosylase [Acinetobacter baumannii]		36.36	242	115	9	562	799	95	463	669	4e-32	130
AKQ25294.1		AKJ44095.1 transglycosylase [Acinetobacter baumannii]		36.36	242	115	9	562	799	95	463	669	4e-32	130
AKQ25294.1		AIA51580.1 transglycosylase [Acinetobacter baumannii]		36.36	242	115	9	562	799	95	463	669	4e-32	130
AKQ25294.1		AHX63762.1 transglycosylase [Acinetobacter baumannii AC30]		36.36	242	115	9	562	799	95	463	669	4e-32	130
AKQ25294.1		AHJ95158.1 transglycosylase [Acinetobacter baumannii PKAB07]		36.36	242	115	9	562	799	95	463	669	4e-32	130
AKQ25294.1		AVE88745.1 M23 family peptidase [Acinetobacter baumannii]		36.36	242	115	9	562	799	68	320	526	7e-33	131
AKQ25294.1		AUG12743.1 M23 family peptidase [Acinetobacter baumannii]		36.36	242	115	9	562	799	68	320	526	7e-33	131
AKQ25294.1		ATU51156.1 M23 family peptidase [Acinetobacter baumannii]		36.36	242	115	9	562	799	68	320	526	7e-33	131
AKQ25294.1		ARG28552.1 transglycosylase [Acinetobacter baumannii]		36.36	242	115	9	562	799	68	320	526	7e-33	131
AKQ25294.1		ARG23392.1 transglycosylase [Acinetobacter baumannii]		36.36	242	115	9	562	799	68	320	526	7e-33	131
AKQ25294.1		APQ87563.1 transglycosylase [Acinetobacter baumannii]		36.36	242	115	9	562	799	68	320	526	7e-33	131
AKQ25294.1		APM47345.1 transglycosylase [Acinetobacter baumannii]		36.36	242	115	9	562	799	68	320	526	7e-33	131
AKQ25294.1		AML68751.1 transglycosylase [Acinetobacter baumannii]		36.36	242	115	9	562	799	68	320	526	7e-33	131
AKQ25294.1		AMC17237.1 transglycosylase [Acinetobacter baumannii]		36.36	242	115	9	562	799	68	320	526	7e-33	131
AKQ25294.1		ALX97694.1 transglycosylase [Acinetobacter baumannii]		36.36	242	115	9	562	799	68	320	526	7e-33	131
AKQ25294.1		AGQ16024.1 hypothetical protein BJAB07104_03658 [Acinetobacter baumannii BJAB07104]		36.36	242	115	9	562	799	68	320	526	7e-33	131
AKQ25294.1		AFI93787.1 metalloendopeptidase-like membrane protein [Acinetobacter baumannii MDR-TJ]		36.36	242	115	9	562	799	68	320	526	7e-33	131
AKQ25294.1		ADX94186.1 hypothetical protein ABTW07_3769 [Acinetobacter baumannii TCDC-AB0715]		36.36	242	115	9	562	799	68	320	526	7e-33	131
AKQ25294.1		AGQ12158.1 hypothetical protein BJAB0868_03611 [Acinetobacter baumannii BJAB0868]		36.36	242	115	9	562	799	68	320	526	7e-33	131
AKQ25294.1		ENV32563.1 hypothetical protein F960_03257 [Acinetobacter gerneri DSM 14967 = CIP 107464]		35.76	523	287	15	1	515	87	1	482	5e-74	254
AKQ25294.1		APX64088.1 peptidase M23 family protein [Acinetobacter schindleri]		35.76	467	255	10	3	468	74	5	427	3e-69	241
AKQ25294.1		ENV74712.1 hypothetical protein F944_03089 [Acinetobacter ursingii DSM 16037 = CIP 107286]		34.13	501	294	12	1	497	84	1	469	2e-61	219
AKQ25294.1		AWW79631.1 transglycosylase [Acinetobacter baumannii]		33.09	550	292	16	1	533	95	1	491	1e-62	222
AKQ25294.1		AWW75974.1 transglycosylase [Acinetobacter baumannii]		33.09	550	292	16	1	533	95	1	491	1e-62	222
AKQ25294.1		AWS01761.1 transglycosylase [Acinetobacter baumannii]		33.09	550	292	16	1	533	95	1	491	1e-62	222
AKQ25294.1		AVO86428.1 LysM peptidoglycan-binding domain-containing protein [Acinetobacter baumannii]		33.09	550	292	16	1	533	95	1	491	1e-62	222
AKQ25294.1		AVG25140.1 LysM peptidoglycan-binding domain-containing protein [Acinetobacter baumannii]		33.09	550	292	16	1	533	95	1	491	1e-62	222
AKQ25294.1		ATU54766.1 transglycosylase [Acinetobacter baumannii]		33.09	550	292	16	1	533	95	1	491	1e-62	222
AKQ25294.1		ATU47480.1 transglycosylase [Acinetobacter baumannii]		33.09	550	292	16	1	533	95	1	491	1e-62	222
AKQ25294.1		ATU24975.1 hypothetical protein AYP_003744 [Acinetobacter baumannii]		33.09	550	292	16	1	533	95	1	491	1e-62	222
AKQ25294.1		ARG11992.1 transglycosylase [Acinetobacter baumannii]		33.09	550	292	16	1	533	95	1	491	1e-62	222
AKQ25294.1		ARG10904.1 transglycosylase [Acinetobacter baumannii]		33.09	550	292	16	1	533	95	1	491	1e-62	222
AKQ25294.1		ARG00388.1 transglycosylase [Acinetobacter baumannii]		33.09	550	292	16	1	533	95	1	491	1e-62	222
AKQ25294.1		ARF96879.1 transglycosylase [Acinetobacter baumannii]		33.09	550	292	16	1	533	95	1	491	1e-62	222
AKQ25294.1		ARF93239.1 transglycosylase [Acinetobacter baumannii]		33.09	550	292	16	1	533	95	1	491	1e-62	222
AKQ25294.1		APQ91335.1 transglycosylase [Acinetobacter baumannii]		33.09	550	292	16	1	533	95	1	491	1e-62	222
AKQ25294.1		APQ83699.1 transglycosylase [Acinetobacter baumannii]		33.09	550	292	16	1	533	95	1	491	1e-62	222
AKQ25294.1		APJ21663.1 transglycosylase [Acinetobacter baumannii]		33.09	550	292	16	1	533	95	1	491	1e-62	222
AKQ25294.1		APF42070.1 transglycosylase [Acinetobacter baumannii]		33.09	550	292	16	1	533	95	1	491	1e-62	222
AKQ25294.1		AOX98674.1 Peptidase, M23 family [Acinetobacter baumannii]		33.09	550	292	16	1	533	95	1	491	1e-62	222
AKQ25294.1		AOX94827.1 Peptidase, M23 family [Acinetobacter baumannii]		33.09	550	292	16	1	533	95	1	491	1e-62	222
AKQ25294.1		AOX90969.1 Peptidase, M23 family [Acinetobacter baumannii]		33.09	550	292	16	1	533	95	1	491	1e-62	222
AKQ25294.1		AOX87127.1 Peptidase, M23 family [Acinetobacter baumannii]		33.09	550	292	16	1	533	95	1	491	1e-62	222
AKQ25294.1		AOX79602.1 Peptidase, M23 family [Acinetobacter baumannii]		33.09	550	292	16	1	533	95	1	491	1e-62	222
AKQ25294.1		AOX75438.1 Peptidase, M23 family [Acinetobacter baumannii]		33.09	550	292	16	1	533	95	1	491	1e-62	222
AKQ25294.1		SBS20257.1 metalloendopeptidase-like membrane protein, Glycyl-glycine endopeptidase ALE-1 precursor, membrane-bound lytic murein transglycosylase D, Membrane-bound metallopeptidase,Peptidase family M23 [Acinetobacter baumannii]		33.09	550	292	16	1	533	95	1	491	1e-62	222
AKQ25294.1		AML72784.1 transglycosylase [Acinetobacter baumannii]		33.09	550	292	16	1	533	95	1	491	1e-62	222
AKQ25294.1		AKJ44095.1 transglycosylase [Acinetobacter baumannii]		33.09	550	292	16	1	533	95	1	491	1e-62	222
AKQ25294.1		AIA51580.1 transglycosylase [Acinetobacter baumannii]		33.09	550	292	16	1	533	95	1	491	1e-62	222
AKQ25294.1		AHX63762.1 transglycosylase [Acinetobacter baumannii AC30]		33.09	550	292	16	1	533	95	1	491	1e-62	222
AKQ25294.1		AHJ95158.1 transglycosylase [Acinetobacter baumannii PKAB07]		33.09	550	292	16	1	533	95	1	491	1e-62	222
AKQ25294.1		ARD27423.1 transglycosylase [Acinetobacter lactucae]		32.90	535	287	16	1	522	87	1	476	7e-61	217
AKQ25294.1		AJB46697.1 hypothetical protein RR32_00580 [Acinetobacter nosocomialis]		32.62	515	287	14	4	469	74	5	508	5e-42	162
AKQ27383.1	hypothetical protein ACX60_11695 Tse3 [Acinetobacter baumannii ATCC17978_mff]	APX50324.1 hypothetical protein AT570_13945 [Acinetobacter baumannii]	toxin domain not detected	100.00	1001	0	0	1	1001	100	1	1001	0.0	2070
AKQ27383.1		AKQ27383.1 hypothetical protein ACX60_11695 [Acinetobacter baumannii]		100.00	1001	0	0	1	1001	100	1	1001	0.0	2070
AKQ27383.1		AMX18963.1 hypothetical protein IEC338SC_1827 [Acinetobacter pittii]		92.41	1001	75	1	1	1001	100	1	1000	0.0	1893
AKQ27383.1		AUM26774.1 hypothetical protein BVD86_07575 [Acinetobacter pittii]		92.21	1001	77	1	1	1001	100	1	1000	0.0	1889
AKQ27383.1		ENV54863.1 hypothetical protein F952_00945 [Acinetobacter baylyi DSM 14961 = CIP 107474]		65.00	1000	339	5	1	994	99	1	995	0.0	1365
AKQ27383.1		CAG69806.1 hypothetical protein ACIAD3114 [Acinetobacter sp. ADP1]		65.00	1000	339	5	1	994	99	1	995	0.0	1365
AKQ27383.1		ATZ64794.1 hypothetical protein BSR55_16315 [Acinetobacter bereziniae]		52.76	1014	451	9	1	989	99	1	1011	0.0	1053
AKQ27383.1		SNQ29793.1 hypothetical protein SAMN05444584_1764 [Acinetobacter apis]		45.66	1003	484	15	6	994	99	12	967	0.0	853
AKQ27383.1		ENU56438.1 hypothetical protein F981_04627 [Acinetobacter guillouiae CIP 63.46]		30.14	899	559	25	146	998	85	113	988	3e-115	379
AKQ28071.1	nuclease Tse2 [Acinetobacter baumannii ATCC17978_mff]	APX49627.1 hypothetical protein AT570_10180 [Acinetobacter baumannii]	Ntox15 superfamily (368-525)	100.00	529	0	0	1	529	100	1	529	0.0	1101
AKQ28071.1		CUW33963.1 hypothetical protein ABR2091_0541 [Acinetobacter baumannii]		100.00	529	0	0	1	529	100	1	529	0.0	1101
AKQ28071.1		AKQ28071.1 hypothetical protein ACX60_15365 [Acinetobacter baumannii]		100.00	529	0	0	1	529	100	1	529	0.0	1101
AKQ28071.1		CRL93280.1 hypothetical protein ABCIP7010_0542 [Acinetobacter baumannii]		100.00	529	0	0	1	529	100	1	529	0.0	1101
AKQ28071.1		AQV15313.1 hypothetical protein BMU11_07000 [Acinetobacter pittii]		90.74	529	49	0	1	529	100	1	529	0.0	965
AKQ28071.1		EPG37025.1 hypothetical protein F907_02290 [Acinetobacter colistiniresistens]		75.66	530	128	1	1	529	100	1	530	0.0	822
AKQ28071.1		BAP37314.1 hypothetical protein AS4_23740 [Acinetobacter guillouiae]		58.02	343	142	1	3	345	65	5	345	2e-147	434
AKQ28071.1		AMW78309.1 hypothetical protein AMD27_05060 [Acinetobacter sp. TGL-Y2]		56.17	324	140	1	5	328	61	4	325	3e-134	400
AKQ28497.1	triacylglycerol lipase Tse1 [Acinetobacter baumannii ATCC17978_mff]	APX49003.1 triacylglycerol lipase [Acinetobacter baumannii]	toxin domain not detected	100.00	276	0	0	1	276	100	1	276	0.0	566
AKQ28497.1		AKQ28497.1 triacylglycerol lipase [Acinetobacter baumannii]		100.00	276	0	0	1	276	100	1	276	0.0	566
AKQ28497.1		AVN28049.1 triacylglycerol lipase [Acinetobacter baumannii]		99.64	276	1	0	1	276	100	1	276	0.0	566
AKQ28497.1		ARG35123.1 triacylglycerol lipase [Acinetobacter baumannii]		99.64	276	1	0	1	276	100	1	276	0.0	566
AKQ28497.1		ANC37279.1 triacylglycerol lipase [Acinetobacter baumannii]		99.64	276	1	0	1	276	100	1	276	0.0	566
AKQ28497.1		APJ21315.1 hypothetical protein BS064_20305 [Acinetobacter baumannii]		41.15	260	145	5	20	275	93	13	268	8e-57	184
AKQ28497.1		AJB49832.1 hypothetical protein RR32_17610 [Acinetobacter nosocomialis]		41.15	260	145	5	20	275	93	13	268	8e-57	184
AKQ28497.1		ENU56696.1 hypothetical protein F981_04484 [Acinetobacter guillouiae CIP 63.46]		33.19	235	122	10	43	272	83	118	322	2e-24	98.2
ALQ45569.1	Phospholipase Tle4 [Raoultella ornithinolytica]	AMW78934.1 hypothetical protein AMD27_08620 [Acinetobacter sp. TGL-Y2]		32.30	452	227	20	49	438	70	34	468	2e-41	155
ALQ45569.1		ADY80943.1 hypothetical protein BDGL_000357 [Acinetobacter pittii PHEA-2]		32.18	578	298	22	39	548	92	16	567	4e-60	209
ALQ45569.1		AUM27061.1 alpha/beta hydrolase [Acinetobacter pittii]		32.12	579	294	24	39	548	92	16	564	3e-56	198
ALQ45569.1		APV36698.1 alpha/beta hydrolase [Acinetobacter soli]		31.85	584	296	26	39	552	92	16	567	4e-58	203
ALQ45569.1		ENV15135.1 hypothetical protein F964_03857 [Acinetobacter guillouiae NIPH 991]		31.40	430	233	17	50	439	70	35	442	3e-46	169
ALQ45569.1		OBY74177.1 hypothetical protein NG55_10050 [Acinetobacter gyllenbergii]		31.28	470	237	20	34	450	75	25	461	1e-48	177
ALQ45569.1		AOA59609.1 alpha/beta hydrolase [Acinetobacter larvae]		31.26	579	285	25	49	548	90	30	574	3e-54	192
ALQ45569.1		ENV55380.1 hypothetical protein F952_00660 [Acinetobacter baylyi DSM 14961 = CIP 107474]		31.05	583	303	24	39	552	92	16	568	3e-57	201
ALQ45569.1		CAG70081.1 conserved hypothetical protein [Acinetobacter sp. ADP1]		31.05	583	303	24	39	552	92	16	568	3e-57	201
ALQ45569.1		ENV34353.1 hypothetical protein F960_01420 [Acinetobacter gerneri DSM 14967 = CIP 107464]		30.73	436	221	17	61	439	68	53	464	9e-41	153
ALQ45569.1		EPF69889.1 hypothetical protein F945_03638 [Acinetobacter rudis CIP 110305]		30.37	563	300	22	49	548	90	26	559	3e-57	200
ALR26282.1		AMW78934.1 hypothetical protein AMD27_08620 [Acinetobacter sp. TGL-Y2]		72.22	18	5	0	25	42	43	38	55	22	34.7
ALR26282.1		AMW78934.1 hypothetical protein AMD27_08620 [Acinetobacter sp. TGL-Y2]		32.58	264	139	10	212	450	43	220	469	3e-31	125
AMA27713.1	Transglycosylase LysM + Peptidase_M23 domains [Klebsiella pneumoniae subsp. pneumoniae]	ENV14806.1 hypothetical protein F964_04550, partial [Acinetobacter guillouiae NIPH 991]		37.82	193	94	9	295	466	87	427	614	2e-20	91.7
AMA27713.1		ALV74554.1 peptidase, M23 family protein [Acinetobacter johnsonii XBB1]		33.33	222	112	9	272	466	94	601	813	3e-22	97.4
AMA27713.1		ANC38720.1 peptidase M23 [Acinetobacter baumannii]		32.76	232	127	10	257	466	95	611	835	1e-24	104
AMA27713.1		AWW79631.1 transglycosylase [Acinetobacter baumannii]		32.44	487	261	16	13	471	97	227	673	6e-59	205
AMA27713.1		AWW75974.1 transglycosylase [Acinetobacter baumannii]		32.44	487	261	16	13	471	97	227	673	6e-59	205
AMA27713.1		AWS01761.1 transglycosylase [Acinetobacter baumannii]		32.44	487	261	16	13	471	97	227	673	6e-59	205
AMA27713.1		AVO86428.1 LysM peptidoglycan-binding domain-containing protein [Acinetobacter baumannii]		32.44	487	261	16	13	471	97	227	673	6e-59	205
AMA27713.1		AVG25140.1 LysM peptidoglycan-binding domain-containing protein [Acinetobacter baumannii]		32.44	487	261	16	13	471	97	227	673	6e-59	205
AMA27713.1		ATU54766.1 transglycosylase [Acinetobacter baumannii]		32.44	487	261	16	13	471	97	227	673	6e-59	205
AMA27713.1		ATU47480.1 transglycosylase [Acinetobacter baumannii]		32.44	487	261	16	13	471	97	227	673	6e-59	205
AMA27713.1		ATU24975.1 hypothetical protein AYP_003744 [Acinetobacter baumannii]		32.44	487	261	16	13	471	97	227	673	6e-59	205
AMA27713.1		ARG11992.1 transglycosylase [Acinetobacter baumannii]		32.44	487	261	16	13	471	97	227	673	6e-59	205
AMA27713.1		ARG10904.1 transglycosylase [Acinetobacter baumannii]		32.44	487	261	16	13	471	97	227	673	6e-59	205
AMA27713.1		ARG00388.1 transglycosylase [Acinetobacter baumannii]		32.44	487	261	16	13	471	97	227	673	6e-59	205
AMA27713.1		ARF96879.1 transglycosylase [Acinetobacter baumannii]		32.44	487	261	16	13	471	97	227	673	6e-59	205
AMA27713.1		ARF93239.1 transglycosylase [Acinetobacter baumannii]		32.44	487	261	16	13	471	97	227	673	6e-59	205
AMA27713.1		APQ91335.1 transglycosylase [Acinetobacter baumannii]		32.44	487	261	16	13	471	97	227	673	6e-59	205
AMA27713.1		APQ83699.1 transglycosylase [Acinetobacter baumannii]		32.44	487	261	16	13	471	97	227	673	6e-59	205
AMA27713.1		APJ21663.1 transglycosylase [Acinetobacter baumannii]		32.44	487	261	16	13	471	97	227	673	6e-59	205
AMA27713.1		APF42070.1 transglycosylase [Acinetobacter baumannii]		32.44	487	261	16	13	471	97	227	673	6e-59	205
AMA27713.1		AOX98674.1 Peptidase, M23 family [Acinetobacter baumannii]		32.44	487	261	16	13	471	97	227	673	6e-59	205
AMA27713.1		AOX94827.1 Peptidase, M23 family [Acinetobacter baumannii]		32.44	487	261	16	13	471	97	227	673	6e-59	205
AMA27713.1		AOX90969.1 Peptidase, M23 family [Acinetobacter baumannii]		32.44	487	261	16	13	471	97	227	673	6e-59	205
AMA27713.1		AOX87127.1 Peptidase, M23 family [Acinetobacter baumannii]		32.44	487	261	16	13	471	97	227	673	6e-59	205
AMA27713.1		AOX79602.1 Peptidase, M23 family [Acinetobacter baumannii]		32.44	487	261	16	13	471	97	227	673	6e-59	205
AMA27713.1		AOX75438.1 Peptidase, M23 family [Acinetobacter baumannii]		32.44	487	261	16	13	471	97	227	673	6e-59	205
AMA27713.1		SBS20257.1 metalloendopeptidase-like membrane protein, Glycyl-glycine endopeptidase ALE-1 precursor, membrane-bound lytic murein transglycosylase D, Membrane-bound metallopeptidase,Peptidase family M23 [Acinetobacter baumannii]		32.44	487	261	16	13	471	97	227	673	6e-59	205
AMA27713.1		AML72784.1 transglycosylase [Acinetobacter baumannii]		32.44	487	261	16	13	471	97	227	673	6e-59	205
AMA27713.1		AKJ44095.1 transglycosylase [Acinetobacter baumannii]		32.44	487	261	16	13	471	97	227	673	6e-59	205
AMA27713.1		AIA51580.1 transglycosylase [Acinetobacter baumannii]		32.44	487	261	16	13	471	97	227	673	6e-59	205
AMA27713.1		AHX63762.1 transglycosylase [Acinetobacter baumannii AC30]		32.44	487	261	16	13	471	97	227	673	6e-59	205
AMA27713.1		AHJ95158.1 transglycosylase [Acinetobacter baumannii PKAB07]		32.44	487	261	16	13	471	97	227	673	6e-59	205
AMA27713.1		AGQ12158.1 hypothetical protein BJAB0868_03611 [Acinetobacter baumannii BJAB0868]		32.37	482	259	15	13	466	96	84	526	6e-60	205
AMA27713.1		AVE88745.1 M23 family peptidase [Acinetobacter baumannii]		32.37	482	259	15	13	466	96	84	526	8e-60	205
AMA27713.1		AUG12743.1 M23 family peptidase [Acinetobacter baumannii]		32.37	482	259	15	13	466	96	84	526	8e-60	205
AMA27713.1		ATU51156.1 M23 family peptidase [Acinetobacter baumannii]		32.37	482	259	15	13	466	96	84	526	8e-60	205
AMA27713.1		ARG28552.1 transglycosylase [Acinetobacter baumannii]		32.37	482	259	15	13	466	96	84	526	8e-60	205
AMA27713.1		ARG23392.1 transglycosylase [Acinetobacter baumannii]		32.37	482	259	15	13	466	96	84	526	8e-60	205
AMA27713.1		APQ87563.1 transglycosylase [Acinetobacter baumannii]		32.37	482	259	15	13	466	96	84	526	8e-60	205
AMA27713.1		APM47345.1 transglycosylase [Acinetobacter baumannii]		32.37	482	259	15	13	466	96	84	526	8e-60	205
AMA27713.1		AML68751.1 transglycosylase [Acinetobacter baumannii]		32.37	482	259	15	13	466	96	84	526	8e-60	205
AMA27713.1		AMC17237.1 transglycosylase [Acinetobacter baumannii]		32.37	482	259	15	13	466	96	84	526	8e-60	205
AMA27713.1		ALX97694.1 transglycosylase [Acinetobacter baumannii]		32.37	482	259	15	13	466	96	84	526	8e-60	205
AMA27713.1		AGQ16024.1 hypothetical protein BJAB07104_03658 [Acinetobacter baumannii BJAB07104]		32.37	482	259	15	13	466	96	84	526	8e-60	205
AMA27713.1		AFI93787.1 metalloendopeptidase-like membrane protein [Acinetobacter baumannii MDR-TJ]		32.37	482	259	15	13	466	96	84	526	8e-60	205
AMA27713.1		ADX94186.1 hypothetical protein ABTW07_3769 [Acinetobacter baumannii TCDC-AB0715]		32.37	482	259	15	13	466	96	84	526	8e-60	205
AMA27713.1		AMO42308.1 peptidase M23 [Acinetobacter sp. DUT-2]		32.33	232	128	10	257	466	95	587	811	9e-25	105
AMA27713.1		ENV32563.1 hypothetical protein F960_03257 [Acinetobacter gerneri DSM 14967 = CIP 107464]		32.20	472	258	13	13	465	96	231	659	3e-63	217
AMA27713.1		APX64088.1 peptidase M23 family protein [Acinetobacter schindleri]		32.10	486	263	15	9	464	97	218	666	3e-53	189
AMA27713.1		ARD27423.1 transglycosylase [Acinetobacter lactucae]		31.62	487	265	15	13	471	97	224	670	2e-58	203
AMA27713.1		ENV74712.1 hypothetical protein F944_03089 [Acinetobacter ursingii DSM 16037 = CIP 107286]		31.20	484	269	15	13	471	97	236	680	7e-52	185
BAH63084.1	NlpC/P60	ENV34391.1 hypothetical protein F960_01458 [Acinetobacter gerneri DSM 14967 = CIP 107464]		51.28	39	19	0	322	360	42	111	149	3	37.7
BAH63084.1		EPG42735.1 hypothetical protein F907_00159 [Acinetobacter colistiniresistens]		36.07	646	347	21	2	619	97	3	610	5e-97	311
CAU99379.1	Tle1	OUY08934.1 hypothetical protein CAP51_04795 [Acinetobacter populi]		30.99	313	135	16	38	321	51	38	298	9e-19	86.3
CAU99379.1		EPF74387.1 hypothetical protein F945_01600 [Acinetobacter rudis CIP 110305]		30.72	293	121	12	36	318	51	32	252	2e-21	94.4
CAX57944.1	Phospholipase Tle4 [Erwinia billingiae Eb661]	ADY80943.1 hypothetical protein BDGL_000357 [Acinetobacter pittii PHEA-2]		32.34	569	285	23	53	552	90	31	568	4e-63	217
CAX57944.1		AUM27061.1 alpha/beta hydrolase [Acinetobacter pittii]		32.04	568	285	22	53	552	90	31	565	2e-61	213
CAX57944.1		ENV55380.1 hypothetical protein F952_00660 [Acinetobacter baylyi DSM 14961 = CIP 107474]		31.51	568	291	22	53	552	90	31	568	9e-60	207
CAX57944.1		CAG70081.1 conserved hypothetical protein [Acinetobacter sp. ADP1]		31.51	568	291	22	53	552	90	31	568	9e-60	207
CAX57944.1		ENV15135.1 hypothetical protein F964_03857 [Acinetobacter guillouiae NIPH 991]		31.47	464	263	18	50	477	77	35	479	3e-51	184
CAX57944.1		APV36698.1 alpha/beta hydrolase [Acinetobacter soli]		30.51	567	297	20	53	552	90	31	567	7e-63	216
CAX57944.1		AMW78934.1 hypothetical protein AMD27_08620 [Acinetobacter sp. TGL-Y2]		30.43	470	237	19	49	452	73	34	479	3e-40	151
CAX57944.1		EPF69889.1 hypothetical protein F945_03638 [Acinetobacter rudis CIP 110305]		30.37	563	297	14	53	552	90	30	560	2e-64	220
WP_004923555.1	alpha/beta hydrolase Tle1 [Acinetobacter baylyi ADP1]	ENV55380.1 hypothetical protein F952_00660 [Acinetobacter baylyi DSM 14961 = CIP 107474]		100.00	576	0	0	1	576	100	1	576	0.0	1192
WP_004923555.1		CAG70081.1 conserved hypothetical protein [Acinetobacter sp. ADP1]		100.00	576	0	0	1	576	100	1	576	0.0	1192
WP_004923555.1		ADY80943.1 hypothetical protein BDGL_000357 [Acinetobacter pittii PHEA-2]		93.06	576	40	0	1	576	100	1	576	0.0	1123
WP_004923555.1		AUM27061.1 alpha/beta hydrolase [Acinetobacter pittii]		91.32	576	47	1	1	576	100	1	573	0.0	1081
WP_004923555.1		APV36698.1 alpha/beta hydrolase [Acinetobacter soli]		87.91	579	63	3	1	576	100	1	575	0.0	1045
WP_004923555.1		EPF69889.1 hypothetical protein F945_03638 [Acinetobacter rudis CIP 110305]		71.70	576	155	6	1	576	100	1	568	0.0	832
WP_004923555.1		AOA59609.1 alpha/beta hydrolase [Acinetobacter larvae]		58.53	586	223	6	3	576	99	6	583	0.0	677
WP_004923555.1		ATZ63497.1 hypothetical protein BSR55_09150 [Acinetobacter bereziniae]		49.83	586	263	9	8	576	99	9	580	0.0	541
WP_004923555.1		ENV15135.1 hypothetical protein F964_03857 [Acinetobacter guillouiae NIPH 991]		35.60	573	315	21	32	566	93	39	595	2e-89	289
WP_004923555.1		ENX33068.1 hypothetical protein F889_03000 [Acinetobacter colistiniresistens]		35.17	634	312	24	11	568	97	18	628	2e-90	292
WP_004923555.1		AMW78934.1 hypothetical protein AMD27_08620 [Acinetobacter sp. TGL-Y2]		34.60	630	320	24	11	567	97	18	628	2e-89	290
WP_004923555.1		ENV34353.1 hypothetical protein F960_01420 [Acinetobacter gerneri DSM 14967 = CIP 107464]		33.66	606	335	19	11	565	96	25	614	5e-82	270
WP_004923555.1		OBY74177.1 hypothetical protein NG55_10050 [Acinetobacter gyllenbergii]		33.07	632	328	25	2	566	98	10	613	6e-89	288
WP_004923555.1		ATZ63747.1 hypothetical protein BSR55_10470 [Acinetobacter bereziniae]		32.32	622	325	23	11	566	97	24	615	5e-81	267
WP_004923555.1		BAP37137.1 hypothetical protein AS4_21970 [Acinetobacter guillouiae]		31.52	625	327	24	11	566	97	24	616	3e-79	262
WP_004924379.1	hypothetical protein ACIAD3114 Tse2 [Acinetobacter baylyi ADP1]	ENV54863.1 hypothetical protein F952_00945 [Acinetobacter baylyi DSM 14961 = CIP 107474]		100.00	1001	0	0	1	1001	100	1	1001	0.0	2078
WP_004924379.1		CAG69806.1 hypothetical protein ACIAD3114 [Acinetobacter sp. ADP1]		100.00	1001	0	0	1	1001	100	1	1001	0.0	2078
WP_004924379.1		AUM26774.1 hypothetical protein BVD86_07575 [Acinetobacter pittii]		65.57	999	334	4	1	995	99	1	993	0.0	1358
WP_004924379.1		AMX18963.1 hypothetical protein IEC338SC_1827 [Acinetobacter pittii]		65.37	999	336	4	1	995	99	1	993	0.0	1356
WP_004924379.1		APX50324.1 hypothetical protein AT570_13945 [Acinetobacter baumannii]		64.30	1000	346	5	1	995	99	1	994	0.0	1335
WP_004924379.1		AKQ27383.1 hypothetical protein ACX60_11695 [Acinetobacter baumannii]		64.30	1000	346	5	1	995	99	1	994	0.0	1335
WP_004924379.1		ATZ64794.1 hypothetical protein BSR55_16315 [Acinetobacter bereziniae]		52.22	1015	456	9	1	990	99	1	1011	0.0	1041
WP_004924379.1		SNQ29793.1 hypothetical protein SAMN05444584_1764 [Acinetobacter apis]		47.51	1004	466	13	1	989	99	3	960	0.0	893
WP_004924379.1		ENU56438.1 hypothetical protein F981_04627 [Acinetobacter guillouiae CIP 63.46]		30.81	860	531	22	153	968	82	120	959	4e-117	384
WP_004926873.1	hypothetical protein ACIAD1789 Tap1 chaperone [Acinetobacter baylyi ADP1]	ENV54312.1 hypothetical protein F952_01618 [Acinetobacter baylyi DSM 14961 = CIP 107474]		100.00	227	0	0	1	227	100	1	227	5e-164	454
WP_004926873.1		CAG68626.1 hypothetical protein ACIAD1789 [Acinetobacter sp. ADP1]		100.00	227	0	0	1	227	100	1	227	5e-164	454
WP_004926873.1		EPG37510.1 hypothetical protein F907_01479 [Acinetobacter colistiniresistens]		83.57	140	23	0	88	227	62	1	140	4e-81	240
WP_004926873.1		EPF74531.1 hypothetical protein F945_01570 [Acinetobacter rudis CIP 110305]		44.16	197	107	2	6	199	85	6	202	3e-51	167
WP_004930578.1	LysM peptidoglycan-binding domain-containing protein Tae1 [Acinetobacter baylyi ADP1]	ENV52988.1 hypothetical protein F952_02815 [Acinetobacter baylyi DSM 14961 = CIP 107474]		100.00	727	0	0	1	727	100	1	727	0.0	1505
WP_004930578.1		CAG67141.1 hypothetical protein ACIAD0168 [Acinetobacter sp. ADP1]		100.00	727	0	0	1	727	100	1	727	0.0	1505
WP_004930578.1		ENW07222.1 hypothetical protein F933_01690 [Acinetobacter beijerinckii CIP 110307]		95.46	727	31	1	1	727	100	1	725	0.0	1436
WP_004930578.1		KMV04234.1 lysM domain protein [Acinetobacter baumannii]		78.88	729	138	5	1	727	100	1	715	0.0	1182
WP_004930578.1		AVF06731.1 peptidoglycan-binding protein [Acinetobacter baumannii]		78.05	729	144	5	1	727	100	1	715	0.0	1173
WP_004930578.1		ESK37969.1 hypothetical protein F987_03300 [Acinetobacter gyllenbergii NIPH 230]		71.33	579	146	5	1	564	78	1	574	0.0	794
WP_004930578.1		AWV85121.1 peptidoglycan-binding protein [Acinetobacter radioresistens]		68.95	554	132	12	1	535	74	1	533	0.0	731
WP_004930578.1		PJG66053.1 LysM peptidoglycan-binding domain-containing protein [Acinetobacter seifertii]		65.98	726	227	9	1	718	99	1	714	0.0	944
WP_004930578.1		SCD17668.1 transcriptional regulator [Acinetobacter calcoaceticus]		64.34	558	159	10	1	535	74	1	541	0.0	699
WP_004930578.1		AFU36206.1 transcriptional regulator [Acinetobacter baumannii TYTH-1]		62.59	556	168	9	1	535	74	1	537	0.0	651
WP_004930578.1		AVN31396.1 LysM peptidoglycan-binding domain-containing protein [Acinetobacter baumannii]		61.15	556	176	9	1	535	74	1	537	0.0	636
WP_004930578.1		ARG34923.1 peptidoglycan-binding protein [Acinetobacter baumannii]		61.15	556	176	9	1	535	74	1	537	0.0	636
WP_004930578.1		CUW36929.1 hypothetical protein ABR2091_3572 [Acinetobacter baumannii]		61.15	556	176	9	1	535	74	1	537	0.0	636
WP_004930578.1		CRL96238.1 hypothetical protein ABCIP7010_3563 [Acinetobacter baumannii]		61.15	556	176	9	1	535	74	1	537	0.0	636
WP_004930578.1		KYQ71183.1 peptidoglycan-binding protein [Acinetobacter pragensis]		45.82	550	266	8	1	535	74	1	533	3e-159	480
WP_004930578.1		SNQ29693.1 Predicted chitinase [Acinetobacter apis]		42.47	664	320	14	1	646	89	1	620	7e-151	459
WP_004930578.1		ENV80726.1 hypothetical protein F942_00548 [Acinetobacter ursingii ANC 3649]		34.01	297	167	9	1	290	40	1	275	8e-34	135
WP_004930875.1	Metallopeptidase Tpe1 [Acinetobacter baylyi ADP1]	AMW79973.1 hypothetical protein AMD27_14400 [Acinetobacter sp. TGL-Y2]		31.29	147	77	5	30	173	69	107	232	2e-15	70.9
